# Supplementary material for: Antivirals for influenza-Like Illness? A randomised Controlled trial of Clinical and Cost effectiveness in primary CarE (ALIC4 E): the ALIC4 E protocol
Source: PubMed Central journal article supplement — BMJ Open. 2018 Jul 12;8(7):e021032. doi: 10.1136/bmjopen-2017-021032 (PMC6089276; doi:10.1136/bmjopen-2017-021032), 2018-07-12
Supplement: bmjopen-2017-021032.draft_revisions.pdf [file bmjopen-2017-021032.draft_revisions.pdf]

# BMJ Open

BMJ Open is committed to open peer review. As part of this commitment we make the peer review history of every article we publish publicly available.

When an article is published we post the peer reviewers' comments and the authors' responses online. We also post the versions of the paper that were used during peer review. These are the versions that the peer review comments apply to.

The versions of the paper that follow are the versions that were submitted during the peer review process. They are not the versions of record or the final published versions. They should not be cited or distributed as the published version of this manuscript.

BMJ Open is an open access journal and the full, final, typeset and author-corrected version of record of the manuscript is available on our site with no access controls, subscription charges or pay-per-view fees (<http://bmjopen.bmj.com>).

If you have any questions on BMJ Open's open peer review process please email [info.bmjopen@bmj.com](mailto:info.bmjopen@bmj.com)

# BMJ Open

## Antivirals for influenza-like illness? Protocol for a randomized controlled trial of clinical and cost effectiveness in primary care (ALIC4E)

|                               |                                                                                                                                                                                                                                                                                                                                                                                                                                                                                                                                                                                                                                                                                                                                                                                                                                                                                                                                                                                                                                                                                                                                                                                                                                                                                                                                                                                                                                                                                                                                                                                                                                                                                                                                                                                                                                                                                                                                                                                                                                                                                                                                                                                                                                                                                                                                               |
|-------------------------------|-----------------------------------------------------------------------------------------------------------------------------------------------------------------------------------------------------------------------------------------------------------------------------------------------------------------------------------------------------------------------------------------------------------------------------------------------------------------------------------------------------------------------------------------------------------------------------------------------------------------------------------------------------------------------------------------------------------------------------------------------------------------------------------------------------------------------------------------------------------------------------------------------------------------------------------------------------------------------------------------------------------------------------------------------------------------------------------------------------------------------------------------------------------------------------------------------------------------------------------------------------------------------------------------------------------------------------------------------------------------------------------------------------------------------------------------------------------------------------------------------------------------------------------------------------------------------------------------------------------------------------------------------------------------------------------------------------------------------------------------------------------------------------------------------------------------------------------------------------------------------------------------------------------------------------------------------------------------------------------------------------------------------------------------------------------------------------------------------------------------------------------------------------------------------------------------------------------------------------------------------------------------------------------------------------------------------------------------------|
| Journal:                      | <i>BMJ Open</i>                                                                                                                                                                                                                                                                                                                                                                                                                                                                                                                                                                                                                                                                                                                                                                                                                                                                                                                                                                                                                                                                                                                                                                                                                                                                                                                                                                                                                                                                                                                                                                                                                                                                                                                                                                                                                                                                                                                                                                                                                                                                                                                                                                                                                                                                                                                               |
| Manuscript ID                 | bmjopen-2017-021032                                                                                                                                                                                                                                                                                                                                                                                                                                                                                                                                                                                                                                                                                                                                                                                                                                                                                                                                                                                                                                                                                                                                                                                                                                                                                                                                                                                                                                                                                                                                                                                                                                                                                                                                                                                                                                                                                                                                                                                                                                                                                                                                                                                                                                                                                                                           |
| Article Type:                 | Protocol                                                                                                                                                                                                                                                                                                                                                                                                                                                                                                                                                                                                                                                                                                                                                                                                                                                                                                                                                                                                                                                                                                                                                                                                                                                                                                                                                                                                                                                                                                                                                                                                                                                                                                                                                                                                                                                                                                                                                                                                                                                                                                                                                                                                                                                                                                                                      |
| Date Submitted by the Author: | 08-Dec-2017                                                                                                                                                                                                                                                                                                                                                                                                                                                                                                                                                                                                                                                                                                                                                                                                                                                                                                                                                                                                                                                                                                                                                                                                                                                                                                                                                                                                                                                                                                                                                                                                                                                                                                                                                                                                                                                                                                                                                                                                                                                                                                                                                                                                                                                                                                                                   |
| Complete List of Authors:     | <p>Bongard, Emily; University of Oxford, Nuffield Department of Primary Care Health Sciences<br/> van der Velden, AW; University Medical Center Utrecht<br/> Cook, Johanna; University of Oxford, Nuffield Department of Primary Care Health Sciences<br/> Saville, Ben; Berry Consultants; Vanderbilt University School of Medicine, Department of Biostatistics<br/> Beutels, Philippe; University of Antwerp, Centre for Health Economics Research and Modelling Infectious Diseases (CHERMID), Vaccine &amp; Infectious Disease Institute (WHO collaborating centre)<br/> Munck Aabenhus, Rune; University of Copenhagen, Institute for Public Health<br/> Brugman, Curt; University Medical Center Utrecht<br/> Chlabicz, Slawomir; Medical University of Bialystok, Department of Family Medicine and Community Nursing<br/> Coenen, Samuel; University of Antwerp, Centre for General Practice, Department of Primary and Interdisciplinary Care (ELIZA); University of Antwerp, Laboratory of Medical Microbiology, Vaccine and Infectious Disease Institute (VAXINFECTIO)<br/> Colliers, Annelies; University Of Antwerp, Centre for General Practice, Department of Primary and Interdisciplinary Care (ELIZA)<br/> Davies, Melanie; Ely Bridge Surgery<br/> De Paor, Muireann; Royal College of Surgeons in Ireland School of Medicine, Department of General Practice<br/> De Sutter, An; Ghent University, Department of Family Medicine and Primary Health Care<br/> Francis, Nick A.; Cardiff University School of Medicine, Department of Population Medicine<br/> Glinz, Dominik; University of Basel; University Hospital Basel, Basel Institute for Clinical Epidemiology and Biostatistics<br/> Godycki-Cwirko, Maciek; Medical University of Lodz, Department of Family and Community Medicine<br/> Goossens, Herman; University of Antwerp, Laboratory of Medical Microbiology, Vaccine &amp; Infectious Disease Institute (VAXINFECTIO)<br/> Holmes, Jane; University of Oxford, Centre for Statistics in Medicine, Nuffield Department of Orthopaedics, Rheumatology and Musculoskeletal Sciences<br/> Ieven, Margareta; University of Antwerp, Laboratory of Medical Microbiology, Vaccine &amp; Infectious Diseases Institute (VAXINFECTIO)<br/> de Jong, Menno; Academic Medical Center, Department of Medical</p> |

|           |                                                                                                                                                                                                                                                                                                                                                                                                                                                                                                                                                                                                                                                                                                                                                                                                                                                                                                                                                                                                                                                                                                                                                                                                                                                                                                                                                                                                                                                                                                                                                              |
|-----------|--------------------------------------------------------------------------------------------------------------------------------------------------------------------------------------------------------------------------------------------------------------------------------------------------------------------------------------------------------------------------------------------------------------------------------------------------------------------------------------------------------------------------------------------------------------------------------------------------------------------------------------------------------------------------------------------------------------------------------------------------------------------------------------------------------------------------------------------------------------------------------------------------------------------------------------------------------------------------------------------------------------------------------------------------------------------------------------------------------------------------------------------------------------------------------------------------------------------------------------------------------------------------------------------------------------------------------------------------------------------------------------------------------------------------------------------------------------------------------------------------------------------------------------------------------------|
|           | <p>Microbiology<br/> Lindbaek, Morten; University of Oslo, Department of General Practice, Institute of Health and Society<br/> Little, Paul; University of Southampton, Primary Care and Population Science<br/> Martinon Torres, Frederico; Hospital Clinico Universitario de Santiago de Compostela, SERGAS<br/> Moragas, Ana; Universitat Rovira i Virgili, Primary Healthcare Centre Jaume I<br/> Pauer, József; Drug Research Centre LLC<br/> Pfeiferová, Markéta; Charles University, Institute of General Practice, First Faculty of Medicine<br/> Radzeviciene-Jurgute, Ruta; JSC Mano Seimos Gydytojas<br/> Sundvall, Pär-Daniel; Research and Development Center Södra Älvsborg, Närhälsan, Research and Development Primary Health Care, Region Västra Götaland; Sahlgrenska Academy at the University of Gothenburg, Department of Public Health and Community Medicine<br/> Thomas, Tammy; University of Southampton, Primary Care and Population Science<br/> Torres, Antoni; Universitat de Barcelona and IDIBAPS, Department of Pulmonology, Hospital Clínic de Barcelona<br/> Touboul, Pia; University Hospital of Nice, Department of Public Health; University of Côte d'Azur, Department of Teaching and Research in General Practice<br/> Varthalis, Dionyssios; University of Crete, Clinic of Social and Family Medicine<br/> Verheij, Theo; University Medical Center Utrecht, Julius Center for Health Sciences and Primary Care<br/> Butler, C; University of Oxford, The Nuffield Department of Primary Care Health Sciences</p> |
| Keywords: | Influenza, Oseltamivir, Primary Health Care, Cost-Benefit Analysis, Adaptive Clinical Trial                                                                                                                                                                                                                                                                                                                                                                                                                                                                                                                                                                                                                                                                                                                                                                                                                                                                                                                                                                                                                                                                                                                                                                                                                                                                                                                                                                                                                                                                  |

SCHOLARONE™  
Manuscripts

1  
2  
3 **Antivirals for influenza-like illness? Protocol for a randomized controlled trial of**  
4 **clinical and cost effectiveness in primary care (ALIC<sup>4</sup>E)**  
5  
6

7 Emily Bongard<sup>1\*</sup>, Alike van der Velden<sup>\*</sup>, Johanna Cook, Ben Saville, Philippe Beutels, Rune  
8 Munck Aabenhus, Curt Brugman, Slawomir Chlabicz, Samuel Coenen, Annelies Colliers,  
9 Melanie Davies, Muireann De Paor, An De Sutter, Nick Francis, Dominik Glinz, Maciek  
10 Godycki-ćwirko, Herman Goossens, Jane Holmes, Margareta Ieven, Menno de Jong, Morten  
11 Lindbæk, Paul Little, Federico Martínón-Torres, Ana Moragas, József Pauer, Markéta  
12 Pfeiferová, Ruta Radzeviciene-Jurgute, Pär-Daniel Sundvall, Tammy Thomas, Antoni Torres,  
13 Pia Touboul, Dionyssios Varthalis, Theo Verheij, Christopher Butler.  
14  
15

16 <sup>1</sup>Corresponding author

17  
18 \*These authors contributed equally as first authors

19 Emily Bongard<sup>1\*</sup>, The Nuffield Department of Primary Care Health Sciences, University of  
20 Oxford, Radcliffe Observatory Quarter, Woodstock Road, Oxford, OX2 6GG, UK. Email:  
21 [emily.bongard@phc.ox.ac.uk](mailto:emily.bongard@phc.ox.ac.uk). Tel: +44 (0)1865 289296. Fax: +44 (0)1865 289412.  
22

23 Alike van der Velden<sup>\*</sup>, University Medical Center Utrecht, Utrecht, Netherlands.  
24

25 Johanna Cook, The Nuffield Department of Primary Care Health Sciences, University of  
26 Oxford, Oxford, UK.  
27

28 Ben Saville, Berry Consultants, Austin, Texas, USA; Department of Biostatistics, Vanderbilt  
29 University School of Medicine, Nashville, Tennessee, USA.  
30

31 Philippe Beutels, Centre for Health Economics Research and Modelling Infectious Diseases  
32 (CHERMID), Vaccine and Infectious Disease Institute (VAXINFECTIO), University of  
33 Antwerp, Antwerp, Belgium.  
34

35 Rune Munck Aabenhus, Institute for Public Health, University of Copenhagen, Copenhagen,  
36 Denmark.  
37

38 Curt Brugman, University Medical Center Utrecht, Utrecht, Netherlands.  
39

40 Slawomir Chlabicz, Department of Family Medicine and Community Nursing, Medical  
41 University of Bialystok, Bialystok, Poland.  
42

43 Samuel Coenen, Centre for General Practice, Department of Primary and Interdisciplinary  
44 Care (ELIZA), University of Antwerp, Antwerp, Belgium; Laboratory of Medical  
45 Microbiology, Vaccine & Infectious Disease Institute (VAXINFECTIO), University of  
46 Antwerp, Antwerp, Belgium.  
47

48 Annelies Colliers, Centre for General Practice, Department of Primary and Interdisciplinary  
49 Care (ELIZA), University of Antwerp, Antwerp, Belgium.  
50

51 Melanie Davies, Ely Bridge Surgery, Ely, Cardiff, UK.  
52

53 Muireann De Paor, Royal College of Surgeons in Ireland, School of Medicine, Department of  
54 General Practice, Dublin, Ireland.  
55  
56  
57  
58  
59  
60

1  
2  
3 An De Sutter, Department of Family Medicine and Primary Health Care, Ghent University,  
4 Ghent, Belgium.

5  
6 Nick A. Francis, Department of Population Medicine, Cardiff University School of Medicine,  
7 Cardiff, UK.

8  
9 Dominik Glinz, University of Basel, Basel, Switzerland; Basel Institute for Clinical  
10 Epidemiology and Biostatistics, University Hospital Basel, Basel, Switzerland.

11  
12 Maciek Godycki-Cwirko, Department of Family and Community Medicine, Medical  
13 University of Lodz, Lodz, Poland.

14  
15 Herman Goossens, Laboratory of Medical Microbiology, Vaccine & Infectious Disease  
16 Institute (VAXINFECTIO), University of Antwerp, Antwerp, Belgium.

17  
18 Jane Holmes, Centre for Statistics in Medicine, Nuffield Department of Orthopaedics,  
19 Rheumatology and Musculoskeletal Sciences, University of Oxford, Oxford, UK.

20  
21 Margareta Ieven, Laboratory of Medical Microbiology, Vaccine & Infectious Diseases  
22 Institute (VAXINFECTIO), University of Antwerp, Antwerp, Belgium.

23  
24 Menno de Jong, Department of Medical Microbiology, Academic Medical Center,  
25 Amsterdam, Netherlands.

26  
27 Morten Lindbæk, Department of General Practice, Institute of Health and Society, University  
28 of Oslo, Oslo, Norway.

29  
30 Paul Little, Primary Care and Population Science, University of Southampton, Southampton,  
31 UK.

32  
33 Federico Martinon-Torres, Hospital Clínico Universitario de Santiago de Compostela,  
34 SERGAS, Santiago de Compostela, Spain.

35  
36 Ana Moragas, Universitat Rovira i Virgili, Primary Healthcare Centre Jaume I, Tarragona,  
37 Catalonia, Spain.

38  
39 József Pauer, Drug Research Centre LLC, Balatonfüred, Hungary.

40  
41 Markéta Pfeiferová, Institute of General Practice, First Faculty of Medicine, Charles  
42 University, Prague, Czech Republic.

43  
44 Ruta Radzeviciene-Jurgute, JSC Mano Seimos Gydytojas, Klaipėda, Lithuania.

45  
46 Pär-Daniel Sundvall, Närhälsan, Research and Development Primary Health Care, Region  
47 Västra Götaland, Research and Development Center Södra Älvsborg Sweden, Borås,  
48 Sweden; Department of Public Health and Community Medicine/Primary Health Care,  
49 Sahlgrenska Academy at the University of Gothenburg, Gothenburg, Sweden.

50  
51 Tammy Thomas, Primary Care and Population Science, University of Southampton,  
52 Southampton, UK.

53  
54 Antoni Torres, Department of Pulmonology, Hospital Clínic de Barcelona, Universitat de  
55 Barcelona and IDIBAPS, CIBERES, Barcelona, Spain.

1  
2  
3 Pia Touboul Lundgren, Department of Public Health, University Hospital of Nice, Nice,  
4 France; Department of Teaching and Research in General Practice, University of Côte  
5 d'Azur, Nice, France.

6  
7 Dionyssios Varthalis, Clinic of Social and Family Medicine, University of Crete, Heraklion,  
8 Greece.

9  
10 Theo Verheij, Julius Center for Health Sciences and Primary Care, University Medical  
11 Center, Utrecht, Netherlands

12  
13 Christopher Butler, The Nuffield Department of Primary Care Health Sciences, University of  
14 Oxford, Oxford, UK.

15  
16  
17 Word Count 4802

## 18 19 20 Abstract

### 21 22 23 Introduction

24  
25  
26 Effective management of seasonal and pandemic influenza is a high priority internationally.  
27 Guidelines in many countries recommend antiviral treatment for older people and individuals  
28 with co-morbidity at increased risk of complications. However, antivirals are not often  
29 prescribed in primary care in Europe, because its clinical benefit has been insufficiently  
30 demonstrated by non-industry funded and pragmatic studies.

### 31 32 33 34 35 36 37 Methods and analysis

38  
39 ALIC<sup>4</sup>E is a European multi-national, multi-centre, phase IV, open-labelled, non-industry  
40 funded, pragmatic, adaptive-platform, randomised controlled trial (RCT). Initial trial arms  
41 will be best usual primary care, and best usual primary care plus treatment with oseltamivir  
42 for five days. We aim to recruit at least 2500 participants  $\geq 1$  year old presenting with  
43 influenza-like illness (ILI), with symptom duration  $\leq 72$  hours in primary care over three  
44 consecutive periods of confirmed high influenza incidence. Participant outcomes will be  
45 followed-up to 28 days by diary and telephone. The primary objective is to determine  
46 whether adding antiviral treatment to best usual primary care is effective in reducing time to  
47 return to usual daily activity with fever, head- and muscle-ache reduced to minor severity or  
48 less. Secondary objectives include determining cost-effectiveness, benefits in subgroups of  
49 participants according to age (<12, 12-64, >64 years), severity of symptoms (low, medium,  
50 high), comorbidity (yes/no), and duration of symptoms ( $\leq 48$ hours/ $>48-72$  hours), decrease in  
51  
52  
53  
54  
55  
56  
57  
58  
59  
60

1  
2  
3 complications (hospital admission and pneumonia), reduction in the use of additional  
4 prescribed medication, including antibiotics, and effects on the use of over-the-counter  
5 medicines and self-management of ILI symptoms.  
6  
7

## 8 9 Ethics and dissemination

10  
11 Research ethics committee (REC) approval was granted by the NRES Committee South  
12 Central (Oxford B) and Clinical Trial Authority (CTA) approval by The Medicines and  
13 Healthcare products Regulatory Agency. All participating countries gained national REC and  
14 CTA approval as required. Dissemination of results will be through peer reviewed scientific  
15 journals and conference presentations.  
16  
17  
18  
19

## 20 21 Trial Registration

22  
23  
24 ISRCTN27908921  
25

## 26 27 Strengths and limitations of this study

- 28  
29
- 30 • ALIC<sup>4</sup>E will be the first publically funded, multi-country, pragmatic study  
31 determining whether antivirals should be routinely prescribed for influenza like illness  
32 (ILI) in primary care.  
33
  - 34 • ALIC<sup>4</sup>E aims to go beyond determining the average treatment effect in a population to  
35 determining effects in patients with combinations of pre-specified characteristics (age,  
36 symptom duration, illness severity, and co-morbidities).  
37
  - 38 • The platform design allows the study to remain relevant to evolving circumstances,  
39 with the ability to add treatments arms.  
40
  - 41 • Response adaptation allows the proportion of participants with key characteristics  
42 allocated to study arms to be altered during the course of the trial according to  
43 emerging outcome data, so that participants' information will be most useful, and  
44 increasing their chances of receiving the intervention that will be most effective for  
45 them.  
46
  - 47 • Because the possibility of taking a placebo influences participant expectations about  
48 their treatment, and determining effects of the interventions on patient behaviour in  
49 real-world care is critical to estimates of cost effectiveness, ALIC<sup>4</sup>E is an open-  
50 labelled trial.  
51  
52  
53  
54  
55  
56  
57  
58  
59  
60

## Keywords

Influenza, Oseltamivir, Primary Health Care, Cost-Benefit Analysis, Adaptive Clinical Trial

## Background

The influenza virus is highly contagious and represents a common cause of respiratory infection with local and systemic symptoms. Annual influenza epidemics account for considerable morbidity and mortality<sup>1</sup> and influenza outbreaks have the potential to become pandemics<sup>2</sup>. Effective control and management of seasonal and pandemic influenza is a high priority for national governments. Routine use of antiviral agents is rare in European primary care<sup>3</sup>. General practitioners (GPs) in Europe usually advise patients who consult with influenza-like illness (ILI) to take paracetamol or non-steroidal anti-inflammatory agents (NSAIDs), either as required or at regular intervals. They may also provide advice about other over-the-counter (OTC) medicines and self-management of ILI symptoms, e.g. maintaining fluids, bed rest and taking time off work or school. This broad approach is currently considered best usual care for the empirical management of ILI in Europe<sup>4-6</sup>.

Currently, the most suitable antiviral agent available for pragmatic evaluation in ALIC<sup>4E</sup> is oseltamivir (Tamiflu®), a neuraminidase inhibitor (NI). The US Food and Drug Administration (FDA) approved oseltamivir in 1999. Oseltamivir was classified by the WHO as an essential medicine until 2017<sup>7,8</sup>, and many countries have stockpiles of the drug to ensure it is readily available to treat seasonal and pandemic influenza<sup>3</sup>.

Oseltamivir phosphate is an oral pro-drug which undergoes hydrolysis by hepatic esterase to form active oseltamivir carboxylate. Oseltamivir carboxylate acts by selective inhibition of influenza A and B viral neuraminidase. This enzyme normally promotes release of the virus from infected cells by cleaving terminal sialic acid residues on the surface of host cells and influenza virus envelopes, and facilitates viral movement within the respiratory tract. By blocking the activity of the enzyme, oseltamivir prevents new viral particles from being released<sup>9,10</sup>. Oseltamivir might also modify the immune response to influenza infection by reducing levels of pro-inflammatory cytokines which might, in turn, modulate symptoms of influenza<sup>11</sup>.



1  
2  
3 Industry-sponsored trials (or studies), efficacy studies and clinical study reports of NIs, most  
4 often oseltamivir, have been the subject of many systematic reviews and meta-analyses,  
5 including individual patient meta-analyses<sup>12-14</sup>. In two meta-analyses differing in  
6 methodology and primary outcome measures but based on almost the same set of trials,  
7 Jefferson *et al.* found that oseltamivir improved the mean time to first alleviation of  
8 symptoms over the placebo by 16.8 hours<sup>11</sup> and Dobson *et al.* found oseltamivir improved  
9 the median time to alleviation of all symptoms over the placebo by 17.8 hours<sup>13</sup>. The  
10 reviewers also found that oseltamivir reduced the risk of self-reported, non-verified  
11 pneumonia but not for clinically diagnosed pneumonia<sup>11 13</sup>. Dobson *et al.* furthermore  
12 indicated that treatment with oseltamivir might reduce the risk of lower respiratory tract  
13 infection complications and hospitalization in patients testing positive for influenza<sup>13</sup>.  
14 However, increased nausea and vomiting were found to be likely associated with oseltamivir  
15 use<sup>11 13</sup>. Even with a possible reduction in symptomatic period (compared to a placebo) the  
16 value of oseltamivir treatment of previously healthy individuals with non-severe seasonal  
17 influenza is questionable. Conversely, circumstances of some individuals, for example those  
18 needing to return to work and parents and other carers, may mean that a reduction in  
19 function-limiting symptoms of a day may be hugely beneficial. The UK Academy of Medical  
20 Sciences recently reviewed current evidence and advise that cost-effectiveness analyses  
21 related to the virulence and severity of symptoms of the circulating strain considering a  
22 societal perspective are needed to further inform such judgements<sup>15</sup>.

23  
24  
25  
26  
27  
28  
29  
30  
31  
32  
33  
34  
35  
36 Since 1999, oseltamivir has generated sales in excess of \$18bn (£11bn; €13bn). The United  
37 States stockpiled 65 million treatments at a cost of \$1.3bn. The United Kingdom spent £424m  
38 on a stockpile of 40 million doses. By 2009, 96 countries possessed enough oseltamivir for  
39 350 million people [4]. In 2017 the WHO downgraded oseltamivir in the list of essential  
40 medicines from a “core” drug to one that is “complimentary”—a category of drugs  
41 considered less cost-effective<sup>7 8</sup>. However, there has never been a large-scale, international,  
42 publically funded, pragmatic RCT of its cost-effectiveness in primary care, and so the  
43 evidence base either to support or not support the routine use of this agent in primary care is  
44 inadequate and raises the question: does the effect found in previous efficacy studies translate  
45 into a meaningful benefit in every day primary care? Specifically, what are the overall costs  
46 and benefits of this possible shortened symptom duration from the perspective of the  
47 individual sufferer, the health services, and for society? Do patients considered to be at higher  
48 risk for complications of influenza (for example due to age, duration and severity of  
49  
50  
51  
52  
53  
54  
55  
56  
57  
58  
59  
60

1  
2  
3 symptoms, or relevant co-morbidity) benefit more from antiviral treatment in primary care?  
4 Answering these questions will reduce important clinical uncertainty for primary care  
5 clinicians about whether to prescribe antiviral agents for ILI, and whether or not to prioritise  
6 antiviral treatment for subgroups of primary care patients.  
7  
8

9  
10 The ALIC<sup>4</sup>E trial will be delivered as work package (WP) 4 of the Platform for European  
11 Preparedness Against (Re-) emerging Epidemics (PREPARE: [www.prepare-europe.org](http://www.prepare-europe.org))  
12 consortium grant. PREPARE is a European Commission funded network for the rapid and  
13 efficient delivery of harmonised, large-scale clinical research studies on infectious diseases  
14 (ID) <sup>16</sup>. ALIC<sup>4</sup>E will be a randomised controlled trial of investigational medicinal products  
15 (CTIMP) in primary care that will determine the clinical- and cost-effectiveness of adding  
16 antiviral agents to best usual primary care for patients with specific characteristics suffering  
17 from ILI, and thus enable clinicians to better individualise prescribing decisions.  
18  
19

20  
21 The primary objective of ALIC<sup>4</sup>E is therefore to determine whether adding antiviral treatment  
22 to best usual primary care is effective in reducing time taken to return to usual daily activity.  
23 Secondary objectives will be to determine whether antiviral treatment is cost-effective;  
24 benefits pre-specified subgroups of participants; decreases hospital admissions; decreases  
25 complications related to ILI, especially pneumonia; improves the health-related quality of  
26 life, decreases (repeat) attendance at the GP, or other health services; decreases time to first  
27 reduction, time to alleviation, and new/worsening of ILI symptoms; reduces the use of over  
28 the counter (OTC) and prescribed medication, including antibiotics, and; affects the self-  
29 management of ILI symptoms.  
30  
31  
32  
33  
34  
35  
36  
37  
38

## 39 40 41 Methods/Design

42  
43 The protocol for ALIC<sup>4</sup>E, is reported according to the Standard Protocol Items  
44 Recommendations for Interventional Trials (SPIRIT) guidelines.  
45  
46

47 ALIC<sup>4</sup>E is a European multi-national, multi-centre, phase IV, open-labelled, pragmatic,  
48 adaptive-platform, randomised controlled trial (RCT). The trial was granted research ethics  
49 committee (REC) approval by the NRES Committee South Central (Oxford B) and Clinical  
50 Trial Authority (CTA) approval by The Medicines and Healthcare products Regulatory  
51 Agency, i.e. the competent authority in the UK. All participating countries gained national  
52 REC and CTA approval as required and when needed. All participants will provide written  
53  
54  
55  
56  
57  
58  
59  
60

1  
2  
3 informed consent before participation. The study will be conducted (using Good Clinical  
4 practice guidelines) according to the principles of the Declaration of Helsinki and in  
5 accordance with other relevant national guidelines, regulations, and acts. An independent  
6 Data Monitoring Committee (DMC) will review efficacy and safety data by treatment  
7 allocation, and a Trial Steering Committee will provide oversight of the trial.  
8  
9  
10

## 11 Networks and participants

12  
13  
14  
15 21 primary care clinical research networks in 15 European countries will recruit participants  
16 (Figure 1), and each network will co-ordinate the recruiting sites within their network.  
17  
18

19 Recruitment will be over three consecutive flu seasons, Q4 2015 to Q1/2 2018. Each season's  
20 start and end of recruitment will be based on local influenza-like illness incidence rising  
21 above (or falling below) pre-specified thresholds, using information supplied by the European  
22 Centre of Disease Prevention and Control (ECDC) <sup>17</sup>, local and regional sources for each  
23 network.  
24  
25  
26  
27

28 We aim to recruit a minimum of 2500 participants through recruiting sites (GP Practice,  
29 primary care Out of Hours (OOH) service or Paediatric Centres within primary care).  
30 Potential participants will be identified when they present to the recruiting sites with  
31 symptoms of ILI, or when they telephone for an appointment or advice about their symptoms.  
32 Participants must meet the inclusion criteria (including symptom onset of 72 hours or less)  
33 and have none of the exclusion criteria (Table 1). If eligible and willing to participate, the  
34 participant will complete the rest of the initial trial procedures either within the same visit, or  
35 at a second appointment with a recruiter at the recruiting site, or at home.  
36  
37  
38  
39  
40  
41

42 Table 1. Eligibility criteria

| Inclusion | Exclusion |
|-----------|-----------|
|-----------|-----------|

- 
- Male or Female, aged at least one year
  - Presenting with ILI\* in primary care during a period of increased influenza activity.
- \* ILI=sudden onset of self-reported fever, with at least one respiratory symptom (cough, sore throat, running or congested nose) and one systemic symptom (headache, muscle ache, sweats or chills or tiredness), symptom duration of 72 hours or less
- Is able and willing to comply with all trial requirements
  - Participant or legal guardian(s) of a child is willing and able to give informed consent
  - Agrees not to take antiviral agents apart from study antiviral agents according to patient randomisation
- Chronic renal failure e.g. known or estimated creatinine glomerular filtration rate <60 ml/min (known = recorded in participant's clinical records)
  - Condition or treatment associated with significant impaired immunity (e.g. long-term oral steroids, chemotherapy, or immune disorder) (known=recorded in participant's clinical records)
  - Those who in the opinion of the responsible clinician should be prescribed immediate antiviral treatment
  - Allergic to oseltamivir or any other trial medication
  - Scheduled elective surgery or other procedures requiring general anaesthesia during the subsequent two weeks
  - Participant with life expectancy estimate by a clinician to be less than 6 months
  - Patient with severe hepatic impairment
  - Responsible clinician considers urgent hospital admission is required
  - Any other significant disease or disorder which, in the opinion of the responsible clinician, may either put the participants at risk because of participation in the trial, or may influence the result of the trial, or may affect the participant's ability to participate in the trial
  - Involvement, including completion of any follow up procedures, in another clinical trial of an investigational medicinal product in the last 90 days
  - Previous ALIC<sup>4</sup>E trial participation
  - Patients unable to be randomised within 72 hours after onset of symptoms
  - Requirement for any live viral vaccine in the next 7 days
  - *Optional according to specific country legislation:*
    - Pregnant, lactating or breastfeeding women
- 

The local implementation of the trial has built-in flexibility and local network recruitment processes vary. For example, medical students may assist with recruitment tasks in certain practices, while others will incorporate triage systems or additional trial specific clinics and/or research support staff in their recruitment processes.

## Randomization and blinding

After obtaining consent, participants will be randomised at the point of care using a remote online electronic data capture (EDC) system (Research Online 2). Emergency randomisation procedures will be available should this web-based facility be temporarily unavailable. Randomisation will initially be a 1:1 ratio between the two arms, with stratification by subgroup according to ECDC definitions of those at higher risk of complications from influenza, namely their age (<12, 12-64, >64 years), severity of symptoms (low, medium, high), any relevant comorbidity<sup>i</sup> (yes/no), and duration of symptoms since onset ( $\leq 48$  hours/ $> 48$ -72 hours). The proportions randomised to study arms may be altered during the course of the trial following a pre-specified Bayesian, response adaptive approach<sup>18</sup>.

ALIC<sup>4</sup>E is an open trial. The participant, the recruiting clinician and the study personnel will be aware of the participant's allocation. An open pragmatic trial was chosen because this design is better for determining effects in routine care when patients are much less tightly supervised. Estimates of effect from efficacy trials may not translate into similar effect sizes when interventions are taken up into routine clinical care. Knowledge of what medication one is taking influences help-seeking behaviour, and decisions to re-consult may substantially affect cost-effectiveness. In addition, efficacy estimates have already been repeatedly determined in efficacy trials with tightly controlled inclusion criteria, in which children, the elderly and people with co-morbidities have been under represented<sup>19</sup>. Clinicians do not prescribe placebos, and so the credible comparator is current best practice<sup>20</sup>. Therefore, no un-blinding or code breaking is required in the event of a relevant emergency. However, the trial team will be blind to treatment allocation at the aggregate level. The recruiter will create equipoise for the participant about the two arms which will be carefully covered in trial specific training, and each arm of the trial will be supported as in routine practice; previous open pragmatic trials have been able to minimise placebo effects using this approach<sup>21 22</sup>.

## Intervention

Participants randomised to best usual primary care plus oseltamivir arm will be given a dose of 75 mg oseltamivir twice a day for five days by the oral route (capsules) for those  $\geq 13$  years. For those who are  $\geq 1$  year but  $< 13$  years the doses will be twice daily for 5 days in suspension, administered orally, according to weight: 10-15 kg = 30 mg; >15-23 kg = 45 mg; >23-40 kg = 60 mg; >40 kg = 75 mg. Children weighing >40 kg and who are able to swallow

1  
2  
3 capsules may receive treatment with the adult dosage of 75 mg capsules twice daily for five  
4 days as an alternative to the same dose of oseltamivir suspension. Weight will be measured in  
5 children  $\leq 12$  years of age during the recruitment visit for medication dosing. All other  
6 participants will be asked about their weight at the baseline assessment and measured in case  
7 of uncertainty.  
8  
9  
10

## 11 Endpoints

12  
13  
14  
15 The primary outcome is patient reported time to having both returned to usual daily activity,  
16 and 'fever', 'headache' and 'muscle-ache' symptoms all rated as  $\leq$  minor problem. For non-  
17 verbal children, 'clinginess' will replace 'headache' and 'muscle ache', when both are  
18 unanswered.  
19  
20  
21

22 Secondary outcomes will include (collected up to day 28):  
23

- 24  
25 • Cost-effectiveness measures through health care resource use and health-related  
26 quality of life
- 27  
28 • Effectiveness in subgroups of participants (based on age bands, initial illness  
29 severity, relevant co-morbidity, duration of symptoms, and laboratory confirmed  
30 influenza A/B positivity)
- 31  
32 • Hospital admissions (overnight stay)
- 33  
34 • (Re-) attendance at GP Practice, hospital emergency care, primary care OOH  
35 services or Paediatric Centres
- 36  
37 • Complications related to ILI and/or potential relevant complications such as  
38 pneumonia
- 39  
40 • Time to first reduction, time to alleviation of, and new/worsening ILI symptoms
- 41  
42 • Use of prescription medications, including antibiotics
- 43  
44 • Use of over-the-counter medications
- 45  
46 • Participant reported self-management and usual daily activities  
47  
48  
49

## 50 Procedures and assessments

51  
52 Table 2 outlines the ALIC<sup>4</sup>E Schedule of Procedures according to the SPIRIT guidelines.  
53  
54

55 Table 2. ALIC<sup>4</sup>E Schedule of Procedures  
56  
57  
58  
59

|                                        | Screening | Baseline Day 1 | Day 1-14 | Day 14 - 28 | Post day 28 |
|----------------------------------------|-----------|----------------|----------|-------------|-------------|
| Eligibility assessment <sup>1</sup>    | ✓         |                |          |             |             |
| Informed consent <sup>1+2</sup>        |           | ✓              |          |             |             |
| Baseline CRF <sup>1</sup>              |           | ✓              |          |             |             |
| Physical examination <sup>1</sup>      |           | ✓              |          |             |             |
| Swab(s) <sup>1</sup>                   |           | ✓              |          |             |             |
| Randomisation <sup>1</sup>             |           | ✓              |          |             |             |
| Dispensing of trial drugs <sup>1</sup> |           | ✓              |          |             |             |
| Symptom Diary <sup>2</sup>             |           |                | ✓        |             |             |
| Day 2-4 Phone Call <sup>3</sup>        |           |                | ✓        |             |             |
| Day 14 -28 Phone Call <sup>3</sup>     |           |                |          | ✓           |             |
| After day 28 Phone Call <sup>3</sup>   |           |                |          |             | ✓           |
| Clinical notes Review* <sup>3</sup>    |           |                |          |             | ✓           |
| Adverse event assessments <sup>3</sup> |           |                | ✓        |             | ✓           |
| SAE Follow-up <sup>3</sup>             |           |                | ✓        |             | ✓           |

\*Country dependent

<sup>1</sup>Completed by recruiter

<sup>2</sup>Completed by participant, includes standardised written health-related quality of life assessment and documents resource use

<sup>3</sup>Completed by trial team (CI/PI/coordinator), Day 28 call includes standardised verbal health-related quality of life assessment

### Baseline Assessment (Day 1)

After obtaining written, informed consent, recruiters will complete a baseline Case Report Form (CRF). This will include the required information for randomisation: age; relevant comorbidities; duration of symptoms; clinician's rating of severity of ILI as mild, moderate or severe. In addition, the CRF will ascertain participant's/parent's severity grading for: fever, running or congested nose, sore throat, headache, cough, shortness of breath, muscle ache and pains, sweats/chills, diarrhoea, nausea and/or vomiting, abdominal pain, low energy/tired, not sleeping well, dizziness, feeling generally unwell (grading = no, minor, moderate, major problem); information about any usual care advice given to the participant; and type of health care coverage (e.g. public, private or mixed). The symptom questions will

1  
2  
3 be supplemented with child-specific questions so that the Canadian Acute Respiratory Illness  
4 Flu Scale will be completed for children  $\leq 12$  years of age<sup>23</sup>.  
5  
6

7 Additionally, clinical examination findings will be recorded including: temperature and the  
8 way it was measured (oral, ear or axilla); use of antipyretics in the last 4 hours; pulse rate;  
9 weight ( $\leq 12$  years of age or in cases of uncertainty); height; smoking status; gender; and  
10 whether they have had flu vaccination within six months and pneumococcal vaccination  
11 within five years.  
12  
13  
14  
15

16 The recruiter will provide antiviral medication according to the participant's group allocation  
17 and standardised instructions on how to take the medication. The recruiter will also take an  
18 oropharyngeal and a nasal swab (COPAN®) from those  $< 16$  years of age and a  
19 nasopharyngeal swab (COPAN®) from those  $\geq 16$  years of age. All swabs will be placed in  
20 3mL universal transport media (UTM) and transported to a local laboratory for storage.  
21 Finally, they will instruct participants how to complete the Symptom Diary and give  
22 information about telephone follow-up assessments.  
23  
24  
25  
26  
27

### 28 **Diary (Day 1 – 14) and Follow-up**

29 There is no requirement for participants to attend a face-to-face follow-up visit as part of their  
30 study participation, as all subsequent measurements will be ascertained by self-completed  
31 diary-based questionnaires and through telephone calls from the local trial team.  
32  
33  
34  
35  
36

37 Participants (or their legal guardian or their carer) will be asked to complete a Symptom  
38 Diary from day 1 (baseline) through to day 14 after randomisation. The following data points  
39 are collected once: expectations of treatment benefit; ethnicity; employment status;  
40 cohabitation; pregnancy and stage; and current long-term medication. The following data  
41 points are collected daily in the diary: severity of selected ILI symptom; quality of life (EQ  
42 Visual Analogue Scale (VAS)); return to usual daily activity; prescription medication use  
43 (including antibiotics); use of OTC medication or remedies; adherence to trial medication and  
44 potential side-effects (up to day 7). The following data points are collected weekly: quality of  
45 life (using EQ 5D 5L index (respondents  $> 12$  years) or EQ 5D 3Y (respondents  $\leq 12$  years));  
46 effect of the participants' symptoms on usual daily activities; health care resource use; out-of-  
47 pocket expenditure; and ILI state of people in the same household.  
48  
49  
50  
51  
52  
53  
54  
55  
56  
57  
58  
59  
60



1  
2  
3 Participants and legal guardians will be telephoned on day three (+/- one day) (with day one  
4 defined as the day they were recruited into the study) to offer support with Symptom Diary  
5 completion and to check for any urgent issues. They will also be telephoned on day 14 (up to  
6 day 28) and asked on what day they returned to their usual daily activity, if and when their  
7 fever, head- and muscle-ache symptoms reduced to minor severity or less to ensure the  
8 primary end point is collected for all participants, and to ascertain any Serious Adverse  
9 Events (SAEs) in the preceding two weeks. Participants will receive a final telephone call on  
10 or after day 28 to complete a verbal EQ-5D-5L/3Y and VAS, to answer remaining questions  
11 about symptom resolution if needed, and about their trial participation and consent process as  
12 part of a process evaluation (see below). The trial team will ask whether participants have had  
13 a recurrence of their symptoms during this time and whether they have been admitted into  
14 hospital as a result of their symptoms.  
15  
16  
17  
18  
19  
20  
21  
22

23 Participants who have visited the hospital with complications possibly related to ILI and who  
24 have had a chest X-ray will have their primary care clinical records examined by the trial  
25 team for confirmation of relevant diagnoses of complications, including pneumonia.  
26  
27  
28

### 29 **Laboratory testing and point of care test (POCT)**

30  
31 Once the swabs have been received at local laboratories, samples will be frozen and stored at  
32 -70°C (-20°C is acceptable if there is no deep-freezer). After each flu season, samples will be  
33 transported to the Laboratory of Medical Microbiology, University of Antwerp, Belgium for  
34 analysis. Each participant's swab(s) will be analysed using a Multiplex RT-PCR for detection  
35 of pathogen genes by TaqMan® technology to identify whether or not the participant is  
36 infected with influenza A or B, with other respiratory viruses<sup>ii</sup>, or with bacteria<sup>iii</sup>.  
37  
38  
39  
40  
41  
42

### 43 **Interviews and Qualitative assessment**

44 As part of the day 28 telephone call to the participants or legal guardians or carers, questions  
45 will be asked about motivation for participating in the ALIC<sup>4</sup>E study, what influenced that  
46 decision, and questions related to research participation during a pandemic.  
47  
48  
49

50 All participating clinicians will be asked to complete a brief questionnaire, and a sub-sample  
51 of approximately 50 will be interviewed using a semi-structured topic guide to obtain their  
52 perspectives on the trial process, their views of influenza management in primary care, and  
53 participation in pandemic research.  
54  
55  
56  
57  
58  
59  
60

## Response Adaptive-Platform Trial Design

An “adaptive platform trial” enables multiple interventions for the same indication to be tested simultaneously within a master protocol, and often includes the capacity to add, or drop, study arms while the study is in progress<sup>24 25</sup>. Platform trials provide an effective framework to study patient heterogeneity in outcomes, with the goal of determining the best treatment for various subgroups of patients. In addition, platform trial designs can incorporate response adaptive randomization in order to randomize more participants to the best performing interventions during the course of the trial. This can increase statistical power and efficiency of the trial, as well as lead to better patient outcomes over the course of the study<sup>26</sup>.

We chose an adaptive platform trial design because it provided flexibility to evaluate additional interventions in the trial, should interventions emerge that are suitable to pragmatic evaluation in primary care. Additionally, the design provides the ability to prospectively identify particular subgroups of interest that may receive benefit from antiviral agents, as opposed to estimating a single overall effect. This is done by incorporating a Bayesian modelling approach, combined with response adaptive randomization based on pre-specified participant characteristics. There will be multiple interim analyses during recruitment; planned every 750 patients and between flu seasons.

In ALIC<sup>4E</sup>, participants will be initially randomised in a 1:1 ratio to the two arms, with stratification by subgroup and random blocks. Each arm will maintain at least a 10% probability of randomisation within each subgroup throughout the course of the trial. Arm superiority will be assessed by subgroup and may be declared superior in some subgroups, but not within others. If, at an interim analysis, an arm meets the superiority criterion for one of the treatments, randomization probabilities may be modified for those subgroups such that a minimum of 10% of participants are allocated to the inferior arm, with the remaining allocation to the superior arm (a maximum of 90%, if two arms). In this event, stratification and blocking will no longer occur within these subgroups. This will ensure the majority of participants receive the best-known therapy, yet the trial design will still allow the assessment of seasonal variation and population changes in the study population over time. In addition, we will still be able to collect data about costs and health related behaviours (including health care seeking) associated with a poorly performing arm.

1  
2  
3 New comparator arms may enter the trial as determined by the Trial Steering Committee.  
4 Eligible therapies will include newly approved treatments for ILI or therapies recommended  
5 by public health agencies during an influenza pandemic. If an arm is added to the trial, there  
6 is a pre-specified algorithm determining randomization ratios, and for activating response  
7 adaptive randomization within subgroups to the respective treatment arms. The operating  
8 characteristics of the trial will be updated via simulation; however the general structure of the  
9 trial does not change. Response adaptive randomization may be activated in subgroups  
10 without satisfying superiority criterion only if the number of interventions is greater than two.  
11  
12  
13  
14  
15

### 16 **Justification of sample size**

17  
18  
19 A sample size calculation for the planned design is not available using traditional formulas.  
20 Instead, simulations must be used to estimate the operating characteristics of the adaptive  
21 algorithm, including estimates of how many participants with particular characteristics are  
22 required in order to detect differences in treatments. In these simulations, the pre-specified  
23 algorithm will be applied such that the randomization of participants with particular pre-  
24 specified characteristics will depend on the number of arms and the collected outcome data.  
25 In addition, the algorithm will determine when arms are dropped for futility, when an  
26 intervention is declared superior, and will have a process for adding a new intervention to the  
27 platform trial.  
28  
29  
30  
31  
32  
33

34  
35 Between 2500 and 4500 participants will be recruited during three consecutive winters. This  
36 range of numbers has been chosen to ensure sufficient power for comparisons in the overall  
37 population, as well as within the pre-specified subgroups. Given the nature of the study's  
38 adaptive design and the desire to ensure sufficient power for multiple hypotheses across  
39 several subgroups, the number of participants needed to be recruited is a complex multi-  
40 dimensional calculation. Hence, numerous simulations were conducted to calculate power  
41 under various plausible scenarios. The maximum target of 4500 participants was chosen from  
42 these simulations because it gave over 80% power for many of the subgroup analyses with a  
43 one day benefit in terms of symptoms relief from oseltamivir. 2500 participants will provide  
44 over 99% power for comparing the primary end point in the overall study population where  
45 there is at least one day benefit of oseltamivir for participants with confirmed influenza. This  
46 number will also provide >80% power for all subgroups if there is a 2-day benefit of  
47 oseltamivir in participants with confirmed influenza. We based these simulations on the  
48  
49  
50  
51  
52  
53  
54  
55  
56  
57  
58  
59  
60

1  
2  
3 assumption that 50% of patients will have confirmed influenza and 50% of patients will have  
4 ILI originating from another viral infection.  
5

### 6 7 **Statistical Analysis** 8

9  
10 The primary analysis will be intention to treat (ITT) and will include all randomised  
11 participants in the treatment arm they were assigned regardless of treatment taken. Secondary  
12 analyses will include the subset of the ITT population with confirmed influenza. As accrual  
13 to the trial is on-going, there will be frequent interim analyses that may update the  
14 randomization probabilities depending on interim results and the number of arms in the study.  
15  
16

17  
18 The composite primary endpoint of return to usual activities with resolution of any fever,  
19 muscle- and headache to a minor problem or less will be modelled according to a Bayesian  
20 piece-wise exponential model. This is a survival time model that allows the baseline hazard  
21 to vary across follow-up. The hazard for reaching the primary endpoint will be modelled  
22 during four time intervals – 0-2 day, 3-5 days, 6-10 days, and 11 or more days. Participants  
23 not reaching the primary endpoint by 28 days (including participants that die) will be  
24 considered censored at 28 days. Participants who withdraw, are lost to follow-up, or not  
25 evaluated for the primary endpoint for any reason will be considered censored at their last  
26 contact date or 28 days, whichever is earlier.  
27  
28  
29  
30  
31  
32  
33

### 34 **Cost-Effectiveness Analysis** 35

36  
37 Cost-effectiveness analysis (CEA) will compare the direct medical costs and health outcomes  
38 (in terms of number of days where ILI limits usual activities and in terms of Quality Adjusted  
39 Life Years gained) between the different arms. The analysis will use data from the trial  
40 (resource use, EQ-5D-5L, EQ-5D-3Y and VAS scores), and other relevant data from the  
41 countries in which the trial is set (e.g., unit costs, and type of health care provided within  
42 each country). Potential differences in repeated measures (EQ-5D-5L, EQ-5D-3Y and VAS)  
43 between arms will be investigated on a per-participant basis using mixed effects models.  
44 Valuation of quality of life (using a standardized instrument for measuring generic health  
45 status) will be done in accordance with the guidelines of the Euroqol group<sup>27</sup>, using the 'EQ-  
46 5D-5L Crosswalk Index Value Calculator'.  
47  
48  
49  
50  
51  
52  
53

54 Uncertainty will be explored using bootstrapping to represent clouds of Incremental Cost-  
55 effectiveness Ratios (ICERs) on the cost-effectiveness plane, as well as cost-effectiveness  
56  
57  
58  
59  
60

1  
2  
3 acceptability curves. Subgroup analyses will be performed to acknowledge heterogeneity  
4 within each arm of the trial (e.g., age, severity, country). Value of perfect information  
5 analysis may also be performed to identify which sources of uncertainty should be reduced  
6 through additional research to efficiently improve decision making.  
7  
8

## 9 10 Discussion

11  
12 The ALIC<sup>4</sup>E Trial will be the first large-scale, international, non-industry sponsored,  
13 pragmatic, randomised trial of (cost-)effectiveness of adding oseltamivir to best usual  
14 primary care for people suffering from ILI. It will be an open trial in order to approximate  
15 effects in conditions close to those of usual care in order to determine real-world estimates of  
16 (cost-) effectiveness.  
17  
18

19  
20  
21  
22 The lack of cost-effectiveness analyses alongside clinical trials, and given that children, older  
23 people and people with co-morbidities are underrepresented in studies that have been done,  
24 has once again been highlighted after the WHO's decision to downgrade the status of  
25 oseltamivir <sup>7 28</sup>. Despite the lack of trial evidence, the 2017 WHO Model List of Essential  
26 Medicines states that the use of oseltamivir should be restricted to severe illness due to  
27 confirmed, or suspected influenza virus infection in critically ill hospitalised patients <sup>8</sup>.  
28 Another report quoting the WHO states: "unless new information supporting the use in  
29 seasonal and pandemic outbreaks is provided, the next Expert Committee might consider  
30 oseltamivir for deletion" <sup>7</sup>. The current UK and US guidelines recommend treatment of  
31 defined subgroups of frail patients and patients with increased risk for complications <sup>4 29</sup>.  
32 Because the evidence base for these recommendations is incomplete, withholding treatment  
33 from these or other patients may possibly deny them benefit. By including a 'best usual  
34 primary care' arm, our study will determine the added benefit of antiviral agents over and  
35 above current practice for seasonal and potentially pandemic influenza. This information will  
36 be of great importance to the delivery of primary care for ILI, as well as enhance the evidence  
37 base around advocating self-care. In many EU countries, patients with ILI symptoms are  
38 advised not to consult but to self-manage, and patients with additional risk factors are seldom  
39 routinely treated with an antiviral agent. This is largely because of an absence of evidence  
40 about the cost-effectiveness overall and in sub-groups of interest.  
41  
42  
43  
44  
45  
46  
47  
48  
49  
50  
51  
52

53  
54 The virulence, spread and type of circulating influenza strains varies from season to season.  
55 ALIC<sup>4</sup>E aims to recruit over three winter/influenza seasons in 15 countries, thereby obtaining  
56  
57  
58  
59

1  
2  
3 widely applicable data. Furthermore, the aim is to include a wide age-range of participants, as  
4 well as those with co-morbidities. Additionally, in the event of an influenza pandemic, or  
5 should additional intervention arms be included, a decision could be made to increase the  
6 maximum sample size.  
7  
8

9  
10  
11 The adaptive design offers several advantages over a traditional study design. Recruitment  
12 into a particular arm can be stopped once a pre-determined level of certainty about the  
13 effectiveness or non-effectiveness of treatment in that arm has reached a pre-defined  
14 estimated precision. Adaptive randomisation will increase the chances of participants being  
15 allocated to arms where their information will be most useful and to the intervention that is  
16 most effective for them. This can lead to better patient care and better patient outcomes as the  
17 trial progresses. Secondly, the platform design allows new intervention arms to be added to  
18 the trial, benefiting from comparisons with existing treatment arms in a head to head way.  
19 This flexibility extends to a potential pandemic situation where additional or alternative  
20 interventions may be added according to governmental or public health recommendations. In  
21 this way, the study will remain current and relevant to clinical practice and evolving  
22 circumstances throughout.  
23  
24  
25  
26  
27  
28  
29

30  
31  
32 ALIC<sup>4</sup>E will be novel in many ways. It will provide critical information about the clinical and  
33 cost-effectiveness of adding oseltamivir to best known ILI management in conditions that  
34 approximate usual care both overall and in important, pre-specified subgroups. ALIC<sup>4</sup>E will  
35 directly impact current practice, either it will confirm best usual primary care, or it will lead  
36 to adaptations.  
37  
38  
39  
40  
41  
42  
43

44 Figure 1. ALIC<sup>4</sup>E European Networks. Coordinating centres are in Oxford, UK and Utrecht,  
45 The Netherlands. A number of the primary care research networks had already established  
46 collaborations through the GRACE (Genomics to combat Resistance against Antibiotics in  
47 Community-acquired LRTI in Europe; [www.grace-lrti.org](http://www.grace-lrti.org)) Network of Excellence.<sup>30 31</sup> They  
48 were sustained through TRACE (Translational Research on Antimicrobial resistance and  
49 Community-acquired infections in Europe; [www.esf.org/trace](http://www.esf.org/trace)) and were complemented by  
50 PREPARE for ALIC<sup>4</sup>E with six additional primary care research networks. The ALIC<sup>4</sup>E  
51 networks include: Belgium (Antwerp, Ghent); Czech Republic; Denmark; France; Greece;  
52  
53  
54  
55  
56  
57  
58  
59  
60

1  
2  
3 Hungary; Ireland; Lithuania; Netherlands, Norway; Poland (Bialystok, Lodz); Spain  
4 (Barcelona, Catalonia, Santiago de Compostela); Sweden; Switzerland; and the UK (Oxford,  
5 Southampton and Cardiff).  
6  
7

## 8 9 **Declarations**

### 10 11 **Competing interests**

12  
13  
14 The authors declare that they have no competing interests.  
15  
16

### 17 **Funding**

18  
19 This work was supported by the European Commission FP7 Programme grant number  
20 HEALTH-F3-2013-602525.  
21  
22

### 23 24 **Authors' contributions**

25  
26 CB and TV are co-chief investigators of this trial and act as guarantors of the study in its  
27 entirety. CB and TV led the development of the research question, study design and obtaining  
28 the funding along with AV, JC, PB, HG, MJ and PL. EB, JC and AV manage the trial and  
29 coordinate the operational delivery of the study protocol to the networks co-ordinating  
30 centres. BS and JH are the trial statisticians. PB provides health economics input. MI  
31 provides support with sampling and analysis. RMA, CBr, SCh, SC, AC, MD, MDP, ADS,  
32 NF, DG, MGC, ML, FMT, AM, JP, MP, RRJ, PDS, TT, AT, PTL, DV are representatives of  
33 the collaborating co-ordinating centres responsible for their networks participation in the trial.  
34 EB and AV wrote the manuscript, supervised by CB. All other authors provided critical  
35 review and final approval of the manuscript.  
36  
37  
38  
39  
40  
41  
42  
43

### 44 **Acknowledgements**

45  
46 In addition to the authors, we would like to acknowledge the contribution of the other  
47 members of the 21 ALIC<sup>4</sup>E co-ordinating centres: Bohumil Seifert, Lars Bjerrum, Mike  
48 Moore, Christos Lionis, Katalin Bezzegh, Tom Fahey, Florian Nicula, Carl Llor, Heiner  
49 Bucher, Sabine de Weirdt, Jane Barnett, Nicola Blakey, Pascale Bruno, Christine Pintaric,  
50 Bernadett Kovács, Réka Pauer, Dovile Narvilaite, Nicolay Jonassen Harbin, Anna Gryko,  
51 Basia Pytel, Ania Kowalczyk, Anca Balan, Monica Groza, Patricia Fernandez-Vandellos,  
52 Carmen Rodriguez-tenreiro Sanchez, Rosa Morros, Helena Pera, Anna Garcia Sangenis,  
53  
54  
55  
56  
57  
58  
59  
60

1  
2  
3 Sofia Sundvall, Filothei Voltyraki, Irene Vasilaki, Antonios Bertsias and Ioanna Tsiligianni.  
4 We also acknowledge and thank the hard work and dedication of all the networks recruitment  
5 teams, practices and local laboratories.  
6  
7

8  
9 The authors would like to acknowledge the contribution of the Trial Steering Committee  
10 members, namely Patrick Bindels, Gordon Taylor, Åke Örtqvist and Keith Shankland  
11 (patient/public representative). Also, the Independent Data Monitoring Committee members  
12 Deborah Ashby, Sonia Saxena and Simon Gates.  
13  
14  
15

16 The authors would also like to acknowledge the other members of the collaborative  
17 PREPARE work packages, in particular: Nina Gobat and Micaela Gal (WP1); Mandy  
18 Kuijstermans, Pieter Moons and Veronique Nussenblatt (WP7); and Frank Leus, Joost  
19 Schotsman, and Susan van Hemert (WP8). Finally we acknowledge the help and support  
20 from the Nuffield Department of Primary Care Health Sciences and Primary Care Clinical  
21 Trials Unit, University of Oxford in particular Sonya Beecher and Julie Allen for their  
22 respective administrative and trial management support.  
23  
24  
25  
26  
27

## 28 **Trial Status**

29  
30 Recruitment started in January 2016 and is expected to be completed by May 2018. The first  
31 two seasons assessed only oseltamivir as an antiviral. There are currently no other antivirals  
32 available to evaluate within this trial. The current protocol is version 4.1 02-DEC-2017.  
33  
34  
35  
36

## 37 **References**

- 38  
39  
40  
41 1. Antonova EN, Rycroft CE, Ambrose CS, et al. Burden of paediatric influenza in Western Europe: a  
42 systematic review. *BMC Public Health* 2012;12:968. doi: 10.1186/1471-2458-12-968  
43 <https://doi.org/10.1186/1471-2458-12-968>  
44 2. World Health Organisation. Factsheet. <http://www.who.int/mediacentre/factsheets/fs211/en/>  
45 (accessed 10 Aug 2017).  
46 3. Adriaenssens N, Coenen S, Kroes AC, et al. European Surveillance of Antimicrobial Consumption  
47 (ESAC): systemic antiviral use in Europe. *J Antimicrob Chemother* 2011;66(8):1897-905. doi:  
48 10.1093/jac/dkr190 [published Online First: 2011/05/31]  
49 4. NICE. Amantadine, oseltamivir and zanamivir for the treatment of influenza. Technology appraisal  
50 guidance 168. 2009. <http://nice.org.uk/guidance/ta168> (accessed 10 Aug 2017).  
51  
52 5. Kramarz P, Monnet D, Nicoll A, et al. Use of oseltamivir in 12 European countries between 2002  
53 and 2007 – lack of association with the appearance of oseltamivir-resistant influenza  
54 A(H1N1) viruses. *Eurosurveillance* 2009;14(5):19112.  
55 doi:<https://doi.org/10.2807/es.e.14.05.19112-en>  
56  
57  
58  
59



- 1
- 2
- 3 6. Stephenson I, Clark TW, Pareek M. Antiviral treatment and prevention of seasonal influenza: A
- 4 comparative review of recommendations in the European Union. *Journal of Clinical Virology*
- 5 2008;42(3):244-48. doi: <https://doi.org/10.1016/j.jcv.2008.04.001>
- 6 7. Kmietowicz Z. WHO downgrades oseltamivir on drugs list after reviewing evidence. *BMJ* 2017;357
- 7 <http://www.bmj.com/content/bmj/357/bmj.j2841.full.pdf> doi: 10.1136/bmj.j2841
- 8 8. World Health Organization. WHO model list of essential medicines 20th list, 2017.
- 9 [http://www.who.int/medicines/publications/essentialmedicines/20th\\_EML2017\\_FINAL\\_ame](http://www.who.int/medicines/publications/essentialmedicines/20th_EML2017_FINAL_amedAug2017.pdf?ua=1)
- 10 [ndedAug2017.pdf?ua=1](http://www.who.int/medicines/publications/essentialmedicines/20th_EML2017_FINAL_amedAug2017.pdf?ua=1) (accessed 08 Dec 2017).
- 11 9. McNicholl IR, McNicholl JJ. Neuraminidase inhibitors: zanamivir and oseltamivir. *Ann*
- 12 *Pharmacother* 2001;35(1):57-70. doi: 10.1345/aph.10118 [published Online First:
- 13 2001/02/24]
- 14 10. Roche Products Limited. SPC Tamiflu 30 mg, 45 mg and 75 mg Hard Capsules, 2017.
- 15 <https://www.medicines.org.uk/emc/medicine/20294> (accessed 10 Aug 2017).
- 16 11. Jefferson T, Jones MA, Doshi P, et al. Neuraminidase inhibitors for preventing and treating
- 17 influenza in healthy adults and children. *Cochrane Database Syst Rev* 2014(4):Cd008965. doi:
- 18 10.1002/14651858.CD008965.pub4 [published Online First: 2014/04/11]
- 19 12. Jefferson T, Jones M, Doshi P, et al. Oseltamivir for influenza in adults and children: systematic
- 20 review of clinical study reports and summary of regulatory comments. *Bmj* 2014;348:g2545.
- 21 doi: 10.1136/bmj.g2545 [published Online First: 2014/05/09]
- 22 13. Dobson J, Whitley RJ, Pocock S, et al. Oseltamivir treatment for influenza in adults: a meta-
- 23 analysis of randomised controlled trials. *Lancet* 2015;385(9979):1729-37. doi:
- 24 10.1016/s0140-6736(14)62449-1 [published Online First: 2015/02/03]
- 25 14. Okoli GN, Otete HE, Beck CR, et al. Use of neuraminidase inhibitors for rapid containment of
- 26 influenza: a systematic review and meta-analysis of individual and household transmission
- 27 studies. *PLoS One* 2014;9(12):e113633. doi: 10.1371/journal.pone.0113633 [published
- 28 Online First: 2014/12/10]
- 29 15. The Academy of Medical Sciences and Wellcome Trust. Use of neuraminidase inhibitors in
- 30 influenza. October 2015. <https://acmedsci.ac.uk/file-download/38069-561595082cd83.pdf>
- 31 (accessed 10 Aug 2017).
- 32 16. PREPARE Consortium. Platform for European Preparedness Against (Re-) emerging Epidemics
- 33 [Available from: <https://www.prepare-europe.eu/> (accessed 10 Aug 2017).
- 34 17. European Centre for Disease Prevention and Control. Seasonal Influenza Surveillance Reports
- 35 <https://ecdc.europa.eu/en/seasonal-influenza/surveillance-reports-and-disease-data>
- 36 (accessed 08 Dec 2017).
- 37 18. Berry DA. Bayesian clinical trials. *Nat Rev Drug Discov* 2006;5(1):27-36. doi: 10.1038/nrd1927
- 38 [published Online First: 2006/02/18]
- 39 19. Krumholz HM. Neuraminidase inhibitors for influenza. *BMJ : British Medical Journal* 2014;348
- 40 doi: 10.1136/bmj.g2548
- 41 20. Thorpe KE, Zwarenstein M, Oxman AD, et al. A pragmatic-explanatory continuum indicator
- 42 summary (PRECIS): a tool to help trial designers. *J Clin Epidemiol* 2009;62(5):464-75. doi:
- 43 10.1016/j.jclinepi.2008.12.011 [published Online First: 2009/04/08]
- 44 21. Little P, Williamson I, Warner G, et al. Open randomised trial of prescribing strategies in
- 45 managing sore throat. *Bmj* 1997;314(7082):722-7. [published Online First: 1997/03/08]
- 46 22. Little P, Rumsby K, Kelly J, et al. Information leaflet and antibiotic prescribing strategies for acute
- 47 lower respiratory tract infection: a randomized controlled trial. *Jama* 2005;293(24):3029-35.
- 48 doi: 10.1001/jama.293.24.3029 [published Online First: 2005/06/24]
- 49 23. Jacobs B, Young NL, Dick PT, et al. Canadian Acute Respiratory Illness and Flu Scale (CARIFS):
- 50 development of a valid measure for childhood respiratory infections. *J Clin Epidemiol*
- 51 2000;53(8):793-9. [published Online First: 2000/08/16]
- 52
- 53
- 54
- 55
- 56
- 57
- 58
- 59

- 1  
2  
3 24. Berry SM, Connor JT, Lewis RJ. The platform trial: an efficient strategy for evaluating multiple  
4 treatments. *Jama* 2015;313(16):1619-20. doi: 10.1001/jama.2015.2316 [published Online  
5 First: 2015/03/24]
- 6 25. Woodcock J, LaVange LM. Master Protocols to Study Multiple Therapies, Multiple Diseases, or  
7 Both. *New England Journal of Medicine* 2017;377(1):62-70. doi: 10.1056/NEJMra1510062
- 8 26. Saville BR, Berry SM. Efficiencies of platform clinical trials: A vision of the future. *Clin Trials*  
9 2016;13(3):358-66. doi: 10.1177/1740774515626362 [published Online First: 2016/02/26]
- 10 27. EuroQol Research Foundation. EuroQol EQ-5D. <https://euroqol.org/euroqol/2017> (accessed 27  
11 Nov 2017).
- 12 28. Ebell MH. WHO downgrades status of oseltamivir. *Bmj* 2017;358:j3266. doi: 10.1136/bmj.j3266  
13 [published Online First: 2017/07/14]
- 14 29. Fiore AE, Fry A, Shay D, et al. Antiviral agents for the treatment and chemoprophylaxis of  
15 influenza --- recommendations of the Advisory Committee on Immunization Practices (ACIP).  
16 *MMWR Recomm Rep* 2011;60(1):1-24. [published Online First: 2011/01/21]
- 17  
18 30. GRACE-LRTI Consortium. Genomics to combat Resistance against Antibiotics in Community-  
19 acquired LRTI in Europe. <http://www.grace-lrti.org> (accessed 10 Aug 2017).
- 20  
21 31. Nuttall J, Hood K, Verheij TJ, et al. Building an international network for a primary care research  
22 program: reflections on challenges and solutions in the set-up and delivery of a prospective  
23 observational study of acute cough in 13 European countries. *BMC Family Practice*  
24 2011;12(1):78. doi: 10.1186/1471-2296-12-78
- 25  
26  
27

## 28 Endnotes

29  
30  
31 <sup>i</sup> Heart Disease/ Diabetes/Chronic respiratory condition (e.g. asthma, COPD)/Hepatic, hematologic, neurologic  
32 or neurodevelopmental condition/Stroke or Transient Ischemic Attack/Overnight hospital admission in the last  
33 year.

34 <sup>ii</sup> Rhinovirus, Coronavirus (NL63/229E/OC43/HKU1), Parainfluenza (1, 2, 3, 4), Human Metapneumovirus A/B,  
35 Bocavirus, Respiratory Syncytial Viruses A/B, Adenovirus, Enterovirus, Parechovirus.

36 <sup>iii</sup> *Mycoplasma pneumoniae*, *Chlamydia pneumoniae*, *Streptococcus pneumoniae*, *Haemophilus influenzae* type  
37 B, *Staphylococcus aureus*.

38  
39  
40  
41  
42  
43  
44  
45  
46  
47  
48  
49  
50  
51  
52  
53  
54  
55  
56  
57  
58  
59  
60

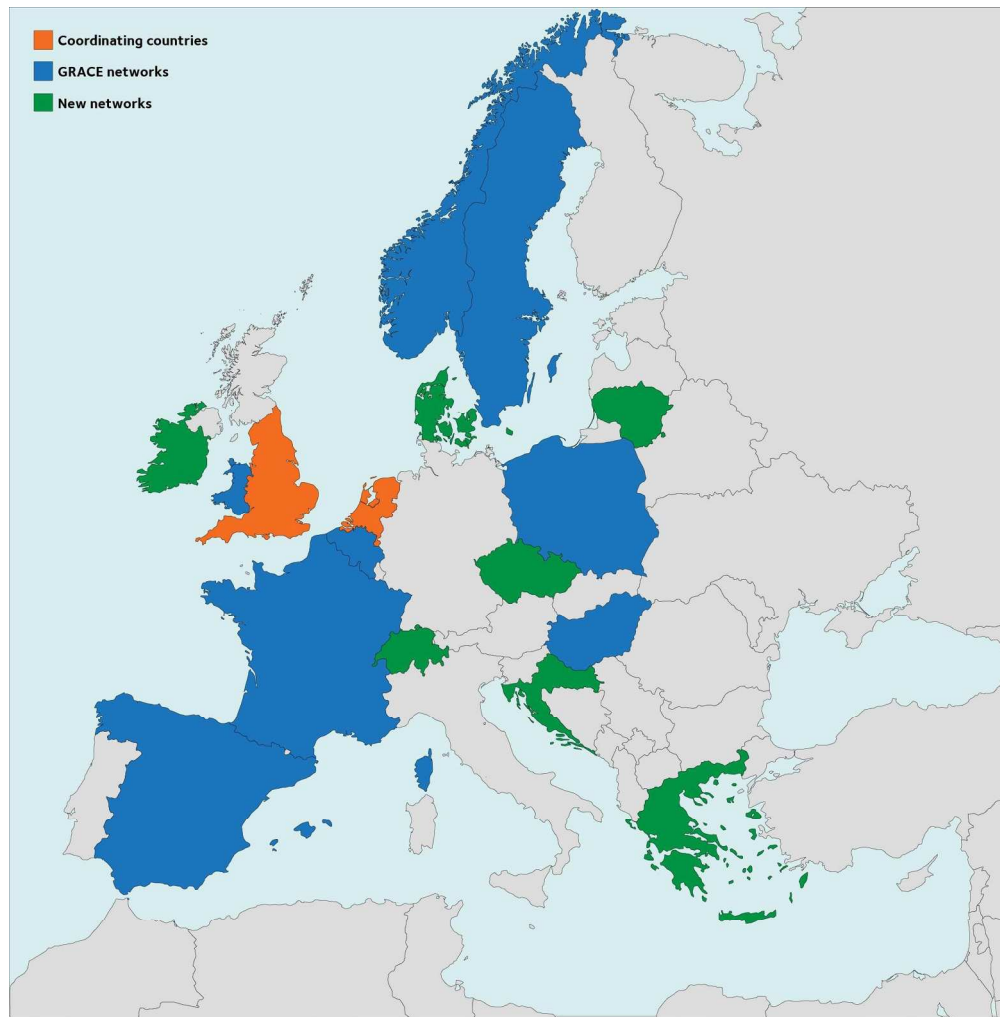

Figure 1. ALIC4E European Networks. Coordinating centres are in Oxford, UK and Utrecht, The Netherlands. A number of the primary care research networks had already established collaborations through the GRACE (Genomics to combat Resistance against Antibiotics in Community-acquired LRTI in Europe; [www.grace-lrti.org](http://www.grace-lrti.org)) Network of Excellence. 30 31 They were sustained through TRACE (Translational Research on Antimicrobial resistance and Community-acquired infections in Europe; [www.esf.org/trace](http://www.esf.org/trace)) and were complemented by PREPARE for ALIC4E with six additional primary care research networks. The ALIC4E networks include: Belgium (Antwerp, Ghent); Czech Republic; Denmark; France; Greece; Hungary; Ireland; Lithuania; Netherlands, Norway; Poland (Bialystok, Lodz); Spain (Barcelona, Catalonia, Santiago de Compostela); Sweden; Switzerland; and the UK (Oxford, Southampton and Cardiff).

171x173mm (300 x 300 DPI)

# BMJ Open

## Antivirals for influenza-Like Illness? A randomized Controlled trial of Clinical and Cost effectiveness in primary Care (ALIC4E): The ALIC4E Protocol

|                               |                                                                                                                                                                                                                                                                                                                                                                                                                                                                                                                                                                                                                                                                                                                                                                                                                                                                                                                                                                                                                                                                                                                                                                                                                                                                                                                                                                                                                                                                                                                                                                                                                                                                                                                                                                                                                                                                                                                                                                                                                                                                                                                                                                                                                                                                                                                                               |
|-------------------------------|-----------------------------------------------------------------------------------------------------------------------------------------------------------------------------------------------------------------------------------------------------------------------------------------------------------------------------------------------------------------------------------------------------------------------------------------------------------------------------------------------------------------------------------------------------------------------------------------------------------------------------------------------------------------------------------------------------------------------------------------------------------------------------------------------------------------------------------------------------------------------------------------------------------------------------------------------------------------------------------------------------------------------------------------------------------------------------------------------------------------------------------------------------------------------------------------------------------------------------------------------------------------------------------------------------------------------------------------------------------------------------------------------------------------------------------------------------------------------------------------------------------------------------------------------------------------------------------------------------------------------------------------------------------------------------------------------------------------------------------------------------------------------------------------------------------------------------------------------------------------------------------------------------------------------------------------------------------------------------------------------------------------------------------------------------------------------------------------------------------------------------------------------------------------------------------------------------------------------------------------------------------------------------------------------------------------------------------------------|
| Journal:                      | <i>BMJ Open</i>                                                                                                                                                                                                                                                                                                                                                                                                                                                                                                                                                                                                                                                                                                                                                                                                                                                                                                                                                                                                                                                                                                                                                                                                                                                                                                                                                                                                                                                                                                                                                                                                                                                                                                                                                                                                                                                                                                                                                                                                                                                                                                                                                                                                                                                                                                                               |
| Manuscript ID                 | bmjopen-2017-021032.R1                                                                                                                                                                                                                                                                                                                                                                                                                                                                                                                                                                                                                                                                                                                                                                                                                                                                                                                                                                                                                                                                                                                                                                                                                                                                                                                                                                                                                                                                                                                                                                                                                                                                                                                                                                                                                                                                                                                                                                                                                                                                                                                                                                                                                                                                                                                        |
| Article Type:                 | Protocol                                                                                                                                                                                                                                                                                                                                                                                                                                                                                                                                                                                                                                                                                                                                                                                                                                                                                                                                                                                                                                                                                                                                                                                                                                                                                                                                                                                                                                                                                                                                                                                                                                                                                                                                                                                                                                                                                                                                                                                                                                                                                                                                                                                                                                                                                                                                      |
| Date Submitted by the Author: | 22-Feb-2018                                                                                                                                                                                                                                                                                                                                                                                                                                                                                                                                                                                                                                                                                                                                                                                                                                                                                                                                                                                                                                                                                                                                                                                                                                                                                                                                                                                                                                                                                                                                                                                                                                                                                                                                                                                                                                                                                                                                                                                                                                                                                                                                                                                                                                                                                                                                   |
| Complete List of Authors:     | <p>Bongard, Emily; University of Oxford, Nuffield Department of Primary Care Health Sciences<br/> van der Velden, AW; University Medical Center Utrecht<br/> Cook, Johanna; University of Oxford, Nuffield Department of Primary Care Health Sciences<br/> Saville, Ben; Berry Consultants; Vanderbilt University School of Medicine, Department of Biostatistics<br/> Beutels, Philippe; University of Antwerp, Centre for Health Economics Research and Modelling Infectious Diseases (CHERMID), Vaccine &amp; Infectious Disease Institute (WHO collaborating centre)<br/> Munck Aabenhus, Rune; University of Copenhagen, Institute for Public Health<br/> Brugman, Curt; University Medical Center Utrecht<br/> Chlabicz, Slawomir; Medical University of Bialystok, Department of Family Medicine and Community Nursing<br/> Coenen, Samuel; University of Antwerp, Centre for General Practice, Department of Primary and Interdisciplinary Care (ELIZA); University of Antwerp, Laboratory of Medical Microbiology, Vaccine and Infectious Disease Institute (VAXINFECTIO)<br/> Colliers, Annelies; University Of Antwerp, Centre for General Practice, Department of Primary and Interdisciplinary Care (ELIZA)<br/> Davies, Melanie; Ely Bridge Surgery<br/> De Paor, Muireann; Royal College of Surgeons in Ireland School of Medicine, Department of General Practice<br/> De Sutter, An; Ghent University, Department of Family Medicine and Primary Health Care<br/> Francis, Nick A.; Cardiff University School of Medicine, Department of Population Medicine<br/> Glinz, Dominik; University of Basel; University Hospital Basel, Basel Institute for Clinical Epidemiology and Biostatistics<br/> Godycki-Cwirko, Maciek; Medical University of Lodz, Department of Family and Community Medicine<br/> Goossens, Herman; University of Antwerp, Laboratory of Medical Microbiology, Vaccine &amp; Infectious Disease Institute (VAXINFECTIO)<br/> Holmes, Jane; University of Oxford, Centre for Statistics in Medicine, Nuffield Department of Orthopaedics, Rheumatology and Musculoskeletal Sciences<br/> Ieven, Margareta; University of Antwerp, Laboratory of Medical Microbiology, Vaccine &amp; Infectious Diseases Institute (VAXINFECTIO)<br/> de Jong, Menno; Academic Medical Center, Department of Medical</p> |

|                                 |                                                                                                                                                                                                                                                                                                                                                                                                                                                                                                                                                                                                                                                                                                                                                                                                                                                                                                                                                                                                                                                                                                                                                                                                                                                                                                                                                                                                                                                                           |
|---------------------------------|---------------------------------------------------------------------------------------------------------------------------------------------------------------------------------------------------------------------------------------------------------------------------------------------------------------------------------------------------------------------------------------------------------------------------------------------------------------------------------------------------------------------------------------------------------------------------------------------------------------------------------------------------------------------------------------------------------------------------------------------------------------------------------------------------------------------------------------------------------------------------------------------------------------------------------------------------------------------------------------------------------------------------------------------------------------------------------------------------------------------------------------------------------------------------------------------------------------------------------------------------------------------------------------------------------------------------------------------------------------------------------------------------------------------------------------------------------------------------|
|                                 | <p>Microbiology<br/> Lindbaek, Morten; University of Oslo, Department of General Practice, Institute of Health and Society<br/> Little, Paul; University of Southampton, Primary Care and Population Science<br/> Martinon Torres, Frederico; Hospital Clinico Universitario de Santiago de Compostela, SERGAS<br/> Moragas, Ana; Universitat Rovira i Virgili, Primary Healthcare Centre Jaume I<br/> Pauer, József; Drug Research Centre LLC<br/> Pfeiferová, Markéta; Charles University, Institute of General Practice, First Faculty of Medicine<br/> Radzeviciene-Jurgute, Ruta; JSC Mano Seimos Gydytojas<br/> Sundvall, Pär-Daniel; Research and Development Center Södra Älvsborg, Närhälsan, Research and Development Primary Health Care, Region Västra Götaland; Sahlgrenska Academy at the University of Gothenburg, Department of Public Health and Community Medicine<br/> Torres, Antoni; Universitat de Barcelona and IDIBAPS, Department of Pulmonology, Hospital Clínic de Barcelona<br/> Touboul, Pia; University Hospital of Nice, Department of Public Health; University of Côte d'Azur, Department of Teaching and Research in General Practice<br/> Varthalis, Dionyssios; University of Crete, Clinic of Social and Family Medicine<br/> Verheij, Theo; University Medical Center Utrecht, Julius Center for Health Sciences and Primary Care<br/> Butler, C; University of Oxford, The Nuffield Department of Primary Care Health Sciences</p> |
| <b>Primary Subject Heading</b>: | General practice / Family practice                                                                                                                                                                                                                                                                                                                                                                                                                                                                                                                                                                                                                                                                                                                                                                                                                                                                                                                                                                                                                                                                                                                                                                                                                                                                                                                                                                                                                                        |
| Secondary Subject Heading:      | Health economics, Evidence based practice, Public health, Research methods, Infectious diseases                                                                                                                                                                                                                                                                                                                                                                                                                                                                                                                                                                                                                                                                                                                                                                                                                                                                                                                                                                                                                                                                                                                                                                                                                                                                                                                                                                           |
| Keywords:                       | Influenza, Oseltamivir, Primary Health Care, Cost-Benefit Analysis, Adaptive Clinical Trial                                                                                                                                                                                                                                                                                                                                                                                                                                                                                                                                                                                                                                                                                                                                                                                                                                                                                                                                                                                                                                                                                                                                                                                                                                                                                                                                                                               |
|                                 |                                                                                                                                                                                                                                                                                                                                                                                                                                                                                                                                                                                                                                                                                                                                                                                                                                                                                                                                                                                                                                                                                                                                                                                                                                                                                                                                                                                                                                                                           |

SCHOLARONE™  
Manuscripts

only

1  
2  
3 **Antivirals for influenza-Like Illness? A randomized Controlled trial of Clinical and**  
4 **Cost effectiveness in primary Care (ALIC<sup>4</sup>E): The ALIC<sup>4</sup>E Protocol**  
5  
6

7 Emily Bongard<sup>1\*</sup>, Alike van der Velden<sup>\*</sup>, Johanna Cook, Ben Saville, Philippe Beutels, Rune  
8 Munck Aabenhus, Curt Brugman, Slawomir Chlabicz, Samuel Coenen, Annelies Colliers,  
9 Melanie Davies, Muireann De Paor, An De Sutter, Nick Francis, Dominik Glinz, Maciek  
10 Godycki- wirko, Herman Goossens, Jane Holmes, Margareta Ieven, Menno de Jong, Morten  
11 Lindb k, Paul Little, Federico Martin n-Torres, Ana Moragas, J zsef Pauer, Mark ta  
12 Pfeiferov , Ruta Radzeviciene-Jurgute, P r-Daniel Sundvall, Antoni Torres, Pia Touboul,  
13 Dionyssios Varthalis, Theo Verheij, Christopher C. Butler.  
14  
15

16 <sup>1</sup>Corresponding author

17  
18 \*These authors contributed equally as first authors

19 Emily Bongard<sup>1\*</sup>, The Nuffield Department of Primary Care Health Sciences, University of  
20 Oxford, Radcliffe Observatory Quarter, Woodstock Road, Oxford, OX2 6GG, UK. Email:  
21 [emily.bongard@phc.ox.ac.uk](mailto:emily.bongard@phc.ox.ac.uk). Tel: +44 (0)1865 289296. Fax: +44 (0)1865 289412.  
22  
23

24 Alike van der Velden<sup>\*</sup>, University Medical Center Utrecht, Utrecht, Netherlands.

25 Johanna Cook, The Nuffield Department of Primary Care Health Sciences, University of  
26 Oxford, Oxford, UK.  
27

28 Ben Saville, Berry Consultants, Austin, Texas, USA; Department of Biostatistics, Vanderbilt  
29 University School of Medicine, Nashville, Tennessee, USA.  
30

31 Philippe Beutels, Centre for Health Economics Research and Modelling Infectious Diseases  
32 (CHERMID), Vaccine and Infectious Disease Institute (VAXINFECTIO), University of  
33 Antwerp, Antwerp, Belgium.  
34

35 Rune Munck Aabenhus, Institute for Public Health, University of Copenhagen, Copenhagen,  
36 Denmark.  
37

38 Curt Brugman, University Medical Center Utrecht, Utrecht, Netherlands.  
39

40 Slawomir Chlabicz, Department of Family Medicine and Community Nursing, Medical  
41 University of Bialystok, Bialystok, Poland.  
42

43 Samuel Coenen, Centre for General Practice, Department of Primary and Interdisciplinary  
44 Care (ELIZA), University of Antwerp, Antwerp, Belgium; Laboratory of Medical  
45 Microbiology, Vaccine & Infectious Disease Institute (VAXINFECTIO), University of  
46 Antwerp, Antwerp, Belgium.  
47

48 Annelies Colliers, Centre for General Practice, Department of Primary and Interdisciplinary  
49 Care (ELIZA), University of Antwerp, Antwerp, Belgium.  
50

51 Melanie Davies, Ely Bridge Surgery, Ely, Cardiff, UK.  
52

53 Muireann De Paor, Royal College of Surgeons in Ireland, School of Medicine, Department of  
54 General Practice, Dublin, Ireland.  
55  
56  
57  
58  
59  
60



1  
2  
3 An De Sutter, Department of Family Medicine and Primary Health Care, Ghent University,  
4 Ghent, Belgium.

5  
6 Nick A. Francis, Department of Population Medicine, Cardiff University School of Medicine,  
7 Cardiff, UK.

8  
9 Dominik Glinz, University of Basel, Basel, Switzerland; Basel Institute for Clinical  
10 Epidemiology and Biostatistics, University Hospital Basel, Basel, Switzerland.

11  
12 Maciek Godycki-Cwirko, Department of Family and Community Medicine, Medical  
13 University of Lodz, Lodz, Poland.

14  
15 Herman Goossens, Laboratory of Medical Microbiology, Vaccine & Infectious Disease  
16 Institute (VAXINFECTIO), University of Antwerp, Antwerp, Belgium.

17  
18 Jane Holmes, Centre for Statistics in Medicine, Nuffield Department of Orthopaedics,  
19 Rheumatology and Musculoskeletal Sciences, University of Oxford, Oxford, UK.

20  
21 Margareta Ieven, Laboratory of Medical Microbiology, Vaccine & Infectious Diseases  
22 Institute (VAXINFECTIO), University of Antwerp, Antwerp, Belgium.

23  
24 Menno de Jong, Department of Medical Microbiology, Academic Medical Center,  
25 Amsterdam, Netherlands.

26  
27 Morten Lindbæk, Department of General Practice, Institute of Health and Society, University  
28 of Oslo, Oslo, Norway.

29  
30 Paul Little, Primary Care and Population Science, University of Southampton, Southampton,  
31 UK.

32  
33 Federico Martinon-Torres, Hospital Clínico Universitario de Santiago de Compostela,  
34 SERGAS, Santiago de Compostela, Spain.

35  
36 Ana Moragas, Universitat Rovira i Virgili, Primary Healthcare Centre Jaume I, Tarragona,  
37 Catalonia, Spain.

38  
39 József Pauer, Drug Research Centre LLC, Balatonfüred, Hungary.

40  
41 Markéta Pfeiferová, Institute of General Practice, First Faculty of Medicine, Charles  
42 University, Prague, Czech Republic.

43  
44 Ruta Radzeviciene-Jurgute, JSC Mano Seimos Gydytojas, Klaipėda, Lithuania.

45  
46 Pär-Daniel Sundvall, Närhälsan, Research and Development Primary Health Care, Region  
47 Västra Götaland, Research and Development Center Södra Älvsborg Sweden, Borås,  
48 Sweden; Department of Public Health and Community Medicine/Primary Health Care,  
49 Sahlgrenska Academy at the University of Gothenburg, Gothenburg, Sweden.

50  
51 Antoni Torres, Department of Pulmonology, Hospital Clínic de Barcelona, Universitat de  
52 Barcelona and IDIBAPS, CIBERES, Barcelona, Spain.

53  
54 Pia Touboul Lundgren, Department of Public Health, University Hospital of Nice, Nice,  
55 France; Department of Teaching and Research in General Practice, University of Côte  
56 d'Azur, Nice, France.

1  
2  
3 Dionyssios Varthalis, Clinic of Social and Family Medicine, University of Crete, Heraklion,  
4 Greece.

5  
6 Theo Verheij, Julius Center for Health Sciences and Primary Care, University Medical  
7 Center, Utrecht, Netherlands

8  
9 Christopher C. Butler, The Nuffield Department of Primary Care Health Sciences, University  
10 of Oxford, Oxford, UK.

11  
12  
13 Word Count 5612

## 14 15 16 Abstract

### 17 18 19 Introduction

20  
21  
22 Effective management of seasonal and pandemic influenza is a high priority internationally.  
23 Guidelines in many countries recommend antiviral treatment for older people and individuals  
24 with co-morbidity at increased risk of complications. However, antivirals are not often  
25 prescribed in primary care in Europe, because its clinical and cost effectiveness has been  
26 insufficiently demonstrated by non-industry funded and pragmatic studies.  
27  
28  
29

### 30 31 32 Methods and analysis

33  
34 ALIC<sup>4</sup>E is a European multi-national, multi-centre, open-labelled, non-industry funded,  
35 pragmatic, adaptive-platform, randomised controlled trial (RCT). Initial trial arms will be  
36 best usual primary care, and best usual primary care plus treatment with oseltamivir for five  
37 days. We aim to recruit at least 2500 participants  $\geq 1$  year old presenting with influenza-like  
38 illness (ILI), with symptom duration  $\leq 72$  hours in primary care over three consecutive  
39 periods of confirmed high influenza incidence. Participant outcomes will be followed-up to  
40 28 days by diary and telephone. The primary objective is to determine whether adding  
41 antiviral treatment to best usual primary care is effective in reducing time to return to usual  
42 daily activity with fever, head- and muscle-ache reduced to minor severity or less. Secondary  
43 objectives include estimating cost-effectiveness, benefits in subgroups according to age (<12,  
44 12-64, >64 years), severity of symptoms (low, medium, high), comorbidity (yes/no), and  
45 duration of symptoms ( $\leq 48$  hours/ $> 48-72$  hours), complications (hospital admission and  
46 pneumonia), use of additional prescribed medication including antibiotics, and use of over-  
47 the-counter medicines and self-management of ILI symptoms.  
48  
49  
50  
51  
52  
53  
54  
55  
56  
57  
58  
59  
60



## Ethics and dissemination

Research ethics committee (REC) approval was granted by the NRES Committee South Central (Oxford B) and Clinical Trial Authority (CTA) approval by The Medicines and Healthcare products Regulatory Agency. All participating countries gained national REC and CTA approval as required. Dissemination of results will be through peer reviewed scientific journals and conference presentations.

## Trial Registration

ISRCTN27908921

## Strengths and limitations of this study

- ALIC<sup>4</sup>E will be the first publically funded, multi-country, pragmatic study determining whether antivirals should be routinely prescribed for influenza like illness (ILI) in primary care.
- ALIC<sup>4</sup>E aims to go beyond determining the average treatment effect in a population to determining effects in patients with combinations of pre-specified characteristics (age, symptom duration, illness severity, and co-morbidities).
- The platform design allows the study to remain relevant to evolving circumstances, with the ability to add treatments arms.
- Response adaptation allows the proportion of participants with key characteristics allocated to study arms to be altered during the course of the trial according to emerging outcome data, so that participants' information will be most useful, and increasing their chances of receiving the intervention that will be most effective for them.
- Because the possibility of taking a placebo influences participant expectation about their treatment, and determining effects of the interventions on patient behaviour in real-world care is critical to estimates of cost effectiveness, ALIC<sup>4</sup>E is designed as an open-labelled trial.

## Keywords

Influenza, Oseltamivir, Primary Health Care, Cost-Benefit Analysis, Adaptive Clinical Trial

## Background

The influenza virus is highly contagious and represents a common cause of respiratory infection with local and systemic symptoms. Annual influenza epidemics account for considerable morbidity and mortality<sup>1-4</sup> and influenza outbreaks have the potential to become pandemics<sup>2</sup>. Effective control and management of seasonal and pandemic influenza is a high priority for national governments. Routine use of antiviral agents is rare in European primary care<sup>5</sup>. General practitioners (GPs) in Europe generally advise patients who consult with influenza-like illness (ILI) to take paracetamol or non-steroidal anti-inflammatory agents (NSAIDs), either as required or at regular intervals. They may also provide advice about other over-the-counter (OTC) medicines and self-management of ILI symptoms, e.g. maintaining fluids, bed rest and taking time off work or school. This broad approach is currently considered best usual care for the empirical management of ILI in Europe<sup>6-8</sup>.

Currently, the most suitable antiviral agent available for pragmatic evaluation in ALIC<sup>4</sup>E is oseltamivir (Tamiflu®), a neuraminidase inhibitor (NI). The US Food and Drug Administration (FDA) approved oseltamivir in 1999. Oseltamivir was classified by the WHO as an essential medicine until 2017<sup>9,10</sup>, and many countries have stockpiles of the drug to ensure it is readily available to treat seasonal and pandemic influenza<sup>5</sup>. Oseltamivir could therefore be used for the management of ILI on assumption that many cases of ILI may be caused by influenza, the probability of this being higher during confirmed periods of heightened influenza based on national reports of ILI consultations and laboratory confirmed influenza cases.

Oseltamivir phosphate is an oral pro-drug which undergoes hydrolysis by hepatic esterase to form active oseltamivir carboxylate. Oseltamivir carboxylate acts by selective inhibition of influenza A and B viral neuraminidase. This enzyme normally promotes release of the virus from infected cells by cleaving terminal sialic acid residues on the surface of host cells and influenza virus envelopes, and facilitates viral movement within the respiratory tract. By blocking the activity of the enzyme, oseltamivir prevents new viral particles from being released<sup>11,12</sup>. Oseltamivir might also modify the immune response to influenza infection by reducing levels of pro-inflammatory cytokines which might, in turn, modulate symptoms of influenza<sup>13</sup>.

1  
2  
3 Industry-sponsored trials (or studies), efficacy studies and clinical study reports of NIs, most  
4 often oseltamivir, have been the subject of many systematic reviews and meta-analyses,  
5 including individual patient meta-analyses<sup>14-16</sup>. In two recent meta-analyses that differed in  
6 their methods and the primary outcome measures used, but that included almost the same set  
7 of trials, Jefferson *et al.* found that oseltamivir improved the mean time to first alleviation of  
8 symptoms over the placebo by 16.8 hours<sup>13</sup> and Dobson *et al.* found oseltamivir improved the  
9 median time to alleviation of all symptoms over the placebo by 17.8 hours<sup>15</sup>. The reviewers  
10 also found that oseltamivir reduced the risk of self-reported, non-verified pneumonia but not  
11 for clinically diagnosed pneumonia<sup>13,15</sup>. Dobson *et al.* furthermore indicated that treatment  
12 with oseltamivir might reduce the risk of lower respiratory tract infection complications and  
13 hospitalization in patients testing positive for influenza<sup>15</sup>. However, increased nausea and  
14 vomiting were found to be associated with oseltamivir use<sup>13,15</sup>. Even with a possible  
15 reduction in symptom duration (compared to a placebo) the value of oseltamivir treatment of  
16 previously healthy individuals with non-severe seasonal influenza is questionable.  
17 Conversely, circumstances of some individuals, for example those urgently needing to return  
18 to work and parents and other carers, may mean that a reduction in function-limiting  
19 symptoms of a day may be considered very worthwhile. The UK Academy of Medical  
20 Sciences recently reviewed current evidence, and they advised that cost-effectiveness  
21 analyses that take virulence and severity of the circulating strain into account from a societal  
22 perspective are required to further inform such judgements<sup>17</sup>.

23  
24  
25  
26  
27  
28  
29  
30  
31  
32  
33  
34  
35  
36 Since 1999, oseltamivir has generated sales in excess of \$18bn (£11bn; €13bn). The United  
37 States stockpiled 65 million treatments at a cost of \$1.3bn. The United Kingdom spent £424m  
38 on a stockpile of 40 million doses. By 2009, 96 countries possessed enough oseltamivir for  
39 350 million people<sup>18</sup>. In 2017 the WHO downgraded oseltamivir in the list of essential  
40 medicines from a “core” drug to one that is “complimentary”—a category of drugs  
41 considered less cost-effective<sup>9,10</sup>. However, there has never been a large-scale, international,  
42 publically funded, pragmatic RCT of its cost-effectiveness in primary care, and so the  
43 evidence base either to support or not support the routine use of this agent in primary care is  
44 inadequate and raises the question: does the effect found in previous efficacy studies translate  
45 into a meaningful benefit in every day primary care? Specifically, what are the overall costs  
46 and benefits of this possible shortened symptom duration from the perspective of the  
47 individual sufferer, the health services, and for society? Do patients considered to be at higher  
48 risk for complications of influenza (for example due to age, duration and severity of  
49  
50  
51  
52  
53  
54  
55  
56  
57  
58  
59  
60

1  
2  
3 symptoms, or relevant co-morbidity) benefit more from antiviral treatment in primary care?  
4 Answering these questions will reduce important clinical uncertainty for primary care  
5 clinicians about whether to prescribe antiviral agents for ILI, and whether or not to prioritise  
6 antiviral treatment for subgroups of primary care patients.  
7  
8

9  
10 The ALIC<sup>4</sup>E trial will be delivered as work package (WP) 4 of the Platform for European  
11 Preparedness Against (Re-) emerging Epidemics (PREPARE: [www.prepare-europe.eu/](http://www.prepare-europe.eu/))  
12 consortium grant. PREPARE is a European Commission funded network for the rapid and  
13 efficient delivery of harmonised, large-scale clinical research studies on infectious diseases  
14 (ID)<sup>19</sup>. ALIC<sup>4</sup>E will be a randomised controlled trial of investigational medicinal products  
15 (CTIMP) in primary care that will determine the clinical- and cost-effectiveness of adding  
16 antiviral agents to best usual primary care for patients with specific characteristics suffering  
17 from ILI, and thus enable clinicians to better individualise prescribing decisions.  
18  
19

20  
21 The primary objective of ALIC<sup>4</sup>E is therefore to determine whether adding antiviral treatment  
22 to best usual primary care is effective in reducing time taken to return to usual daily activity.  
23 Secondary objectives will be to determine whether antiviral treatment is cost-effective;  
24 benefits pre-specified subgroups of participants; decreases hospital admissions; decreases  
25 complications related to ILI, especially pneumonia; improves the health-related quality of  
26 life, decreases (repeat) attendance at the GP, or other health services; decreases time to first  
27 reduction, time to alleviation, and new/worsening of ILI symptoms; reduces the use of over  
28 the counter (OTC) and prescribed medication, including antibiotics, and; affects the self-  
29 management of ILI symptoms.  
30  
31

## 32 33 34 35 36 37 38 39 40 41 42 43 44 45 46 47 48 49 50 51 52 53 54 55 56 57 58 59 60

### Methods/Design

The protocol for ALIC<sup>4</sup>E, is reported according to the Standard Protocol Items  
Recommendations for Interventional Trials (SPIRIT) guidelines.

### Ethics and dissemination

The trial was granted research ethics committee (REC) approval by the NRES Committee  
South Central (Oxford B) and Clinical Trial Authority (CTA) approval by The Medicines and  
Healthcare products Regulatory Agency, i.e. the competent authority in the UK. All  
participating countries gained national REC and CTA approval as required and when needed.

1  
2  
3 All participants will provide written informed consent before participation. The study will be  
4 conducted (using Good Clinical practice guidelines) according to the principles of the  
5 Declaration of Helsinki and in accordance with other relevant national guidelines,  
6 regulations, and acts. An independent Data Monitoring Committee (DMC) will review  
7 efficacy and safety data by treatment allocation, and a Trial Steering Committee will provide  
8 oversight of the trial.  
9  
10  
11

12  
13 A manuscript with the results of the primary outcome will be published in a peer-reviewed  
14 journal. Additional manuscripts will be report secondary outcomes, and be submitted for  
15 publication in peer-reviewed journals.  
16  
17  
18

### 19 Patient and public involvement

20  
21  
22 The relevance and necessity of the research question, study design and development of  
23 patient facing documents including the Consent Forms, Participant Information Sheets,  
24 Symptom Diary, all follow up forms and promotional materials have been reviewed by  
25 members of the public. The patient and public involvement (PPI) group included a mixture of  
26 research experienced and inexperienced people, parents and elderly members of the public.  
27  
28  
29

30  
31 As part of the Trial Steering Committee (TSC) a representative of the relevant patient group  
32 is involved in the continued review of the recruitment to and conduct of the study. A TSC  
33 meeting is held at least once per year before each recruiting season.  
34  
35  
36

37  
38 The intervention arm in ALIC<sup>4</sup>E is the use of an antiviral in addition to best usual primary  
39 care. The burden to participants was assessed by the TSC and considered minimal as the only  
40 antiviral currently being assessed in ALIC<sup>4</sup>E, oseltamivir, is a licensed medication with  
41 marketing authorisation globally. In the context of the ALIC<sup>4</sup>E Trial a standard dose of  
42 oseltamivir has been shown to be well tolerated. The study itself is only using the standard  
43 does of oseltamivir and is being used according to the marketing authorisation it has been  
44 granted.  
45  
46  
47  
48

49  
50 Trial participants will not be informed of the trial results directly. However, the results will  
51 be published on the PREPARE Consortium website (<http://www.prepare-europe.eu/>) and on  
52 the Nuffield Department of Primary Care website (<https://www.phc.ox.ac.uk/phctrials>), both  
53 can be accessed freely.  
54  
55  
56  
57  
58  
59

## Networks and participants

ALIC<sup>4</sup>E is a European multi-national, multi-centre, open-labelled, pragmatic, adaptive-platform, randomised controlled trial (RCT). 21 primary care clinical research networks in 15 European countries will recruit participants (Figure 1), and each network will co-ordinate the recruiting sites within their network. A number of the primary care research networks had already established collaborations through the GRACE (Genomics to combat Resistance against Antibiotics in Community-acquired LRTI in Europe; [www.grace-lrti.org](http://www.grace-lrti.org)) Network of Excellence<sup>20,21</sup>. They were sustained through TRACE (Translational Research on Antimicrobial resistance and Community-acquired infections in Europe; [www.esf.org/trace](http://www.esf.org/trace)) and were complemented by PREPARE for ALIC<sup>4</sup>E with six additional primary care research networks.

Recruitment will be over three consecutive flu seasons, Q4 2015 to Q1/2 2018. Each season's start and end of recruitment will be based on reports of local influenza-like illness incidence rising above (or falling below) pre-specified thresholds, using information supplied by the European Centre of Disease Prevention and Control (ECDC)<sup>22</sup>, and local and regional sources for each network.

We aim to recruit a minimum of 2500 participants through recruiting sites (GP Practice, primary care Out of Hours (OOH) service or Paediatric Centres within primary care). Potential participants will be identified when they present to the recruiting sites with symptoms of ILI, or when they telephone for an appointment or advice about their symptoms. Participants must meet the inclusion criteria (including symptom onset of 72 hours or less) and have none of the exclusion criteria (Table 1). The definition of ILI used in ALIC<sup>4</sup>E was based on the European Centre for Disease Prevention and Control (ECDC) definition<sup>23</sup> with flexibility to maximise recruitment of children and the elderly<sup>24,25</sup>. If eligible and willing to participate, the participant will complete the rest of the initial trial procedures either within the same visit, or at a second appointment with a recruiter at the recruiting site, or at home.

Table 1. Eligibility criteria

| Inclusion | Exclusion |
|-----------|-----------|
|-----------|-----------|

- 
- Male or Female, aged at least one year
  - Presenting with ILI\* in primary care during a period of increased influenza activity.
- \* ILI=sudden onset of self-reported fever, with at least one respiratory symptom (cough, sore throat, running or congested nose) and one systemic symptom (headache, muscle ache, sweats or chills or tiredness), with symptom duration of 72 hours or less
- Is able and willing to comply with all trial requirements
  - Participant or legal guardian(s) of a child is willing and able to give informed consent
  - Agrees not to take antiviral agents apart from study antiviral agents according to patient randomisation
- Chronic renal failure e.g. known or estimated creatinine glomerular filtration rate <60 ml/min (known = recorded in participant's clinical records)
  - Condition or treatment associated with significant impaired immunity (e.g. long-term oral steroids, chemotherapy, or immune disorder) (known=recorded in participant's clinical records)
  - Those who in the opinion of the responsible clinician should be prescribed immediate antiviral treatment
  - Allergic to oseltamivir or any other trial medication
  - Scheduled elective surgery or other procedures requiring general anaesthesia during the subsequent two weeks
  - Participant with life expectancy estimate by a clinician to be less than 6 months
  - Patient with severe hepatic impairment
  - Responsible clinician considers urgent hospital admission is required
  - Any other significant disease or disorder which, in the opinion of the responsible clinician, may either put the participants at risk because of participation in the trial, or may influence the result of the trial, or may affect the participant's ability to participate in the trial
  - Involvement, including completion of any follow up procedures, in another clinical trial of an investigational medicinal product in the last 90 days
  - Previous ALIC<sup>4</sup>E trial participation
  - Patients unable to be randomised within 72 hours after onset of symptoms
  - Requirement for any live viral vaccine in the next 7 days
  - *Optional according to specific country legislation:*
    - Pregnant, lactating or breastfeeding women
- 

The local implementation of the trial has built-in flexibility and local network recruitment processes vary. For example, medical students may assist with recruitment tasks in certain practices, while others will incorporate triage systems or additional trial specific clinics and/or research support staff in their recruitment processes.

## Randomization and blinding

After obtaining informed, written consent, participants will be randomised at the point of care using a remote online electronic data capture (EDC) system (Research Online 2). Emergency randomisation procedures will be available should this web-based facility be temporarily unavailable. Randomisation will initially be a 1:1 ratio between the two arms, with stratification by subgroup according to ECDC definitions of those at higher risk of complications from influenza, namely their age (<12, 12-64, >64 years), severity of symptoms (low, medium, high), any relevant comorbidity<sup>i</sup> (yes/no), and duration of symptoms since onset ( $\leq 48$ hours/ $>48-72$ hours). The proportions randomised to study arms may be altered during the course of the trial following a pre-specified Bayesian, response adaptive approach<sup>26</sup>.

ALIC<sup>4</sup>E is an open trial. The participant, the recruiting clinician and the study personnel will be aware of the participant's allocation. An open pragmatic trial was chosen because this design is better for determining effects in routine care when patients are much less tightly supervised. Estimates of effect from placebo-controlled efficacy trials may not translate into similar effect sizes when interventions are taken up into routine clinical care. Knowledge of what medication one is taking influences help-seeking behaviour, and decisions to re-consult may substantially affect cost-effectiveness. In addition, efficacy estimates have already been repeatedly determined in efficacy trials with tightly controlled inclusion criteria, in which children, the elderly and people with co-morbidities have been under represented<sup>27</sup>. Clinicians do not prescribe placebos in routine care, and so the credible comparator is current best practice<sup>28</sup>. Therefore, no un-blinding or code breaking is required in the event of a relevant emergency. However, the trial team will be blind to treatment allocation at the aggregate level. The recruiter will promote equipoise for the participant about the two arms which will be carefully covered in trial specific training, and each arm of the trial will be supported as in routine practice; previous open pragmatic trials have been able to minimise placebo effects using this approach<sup>29,30</sup>.

## Intervention

Participants randomised to best usual primary care plus oseltamivir arm will be given a dose of 75 mg oseltamivir twice a day for five days by the oral route (capsules) for those  $\geq 13$  years. For those who are  $\geq 1$  year but  $< 13$  years the doses will be twice daily for 5 days in



suspension, administered orally, according to weight: 10-15 kg = 30 mg; >15-23 kg = 45 mg; >23-40 kg = 60 mg; >40 kg = 75 mg. Children weighing >40 kg and who are able to swallow capsules may receive treatment with the adult dosage of 75 mg capsules twice daily for five days as an alternative to the same dose of oseltamivir suspension. Route of administration, dosage and treatment periods follow the manufacturers Summary of Product Characteristics (SPC)<sup>12</sup>. Weight will be measured in children  $\leq 12$  years of age during the recruitment visit for medication dosing. All other participants will be asked about their weight at the baseline assessment and measured in case of uncertainty. A daily Symptom Diary and subsequent day 14-28 telephone call will be used to monitor intervention compliance, and together with a telephone call after day 28, will also ascertain a minimal data set for some other outcomes.

## Endpoints

The primary outcome is patient reported time to having both returned to usual daily activity, and 'fever', 'headache' and 'muscle-ache' symptoms all rated as ' $\leq$ minor problem'. For non-verbal children, 'clinginess' will replace 'headache' and 'muscle ache', when both are unanswered.

Secondary outcomes will include (collected up to day 28):

- Cost-effectiveness measures through health care resource use and health-related quality of life
- Effectiveness in subgroups of participants (based on age bands, initial illness severity, relevant co-morbidity, duration of symptoms, and laboratory confirmed influenza A/B positivity)
- Hospital admissions (overnight stay)
- (Re-) attendance at GP Practice, hospital emergency care, primary care OOH services or Paediatric Centres
- Complications related to ILI and/or potential relevant complications such as pneumonia
- Time to first reduction, time to alleviation of, and new/worsening ILI symptoms
- Use of prescription medications, including antibiotics
- Use of over-the-counter medications
- Participant reported self-management and usual daily activities

## Procedures and assessments

Table 2 outlines the ALIC<sup>4</sup>E Schedule of Procedures according to the SPIRIT guidelines.

Table 2. ALIC<sup>4</sup>E Schedule of Procedures

|                                        | Screening | Baseline<br>Day 1 | Day 1-14 | Day 14 - 28 | Post day 28 |
|----------------------------------------|-----------|-------------------|----------|-------------|-------------|
| Eligibility assessment <sup>1</sup>    | ✓         |                   |          |             |             |
| Informed consent <sup>1+2</sup>        |           | ✓                 |          |             |             |
| Baseline CRF <sup>1</sup>              |           | ✓                 |          |             |             |
| Physical examination <sup>1</sup>      |           | ✓                 |          |             |             |
| Swab(s) <sup>1</sup>                   |           | ✓                 |          |             |             |
| Randomisation <sup>1</sup>             |           | ✓                 |          |             |             |
| Dispensing of trial drugs <sup>1</sup> |           | ✓                 |          |             |             |
| Symptom Diary <sup>2</sup>             |           |                   | ✓        |             |             |
| Day 2-4 Phone Call <sup>3</sup>        |           |                   | ✓        |             |             |
| Day 14 -28 Phone Call <sup>3</sup>     |           |                   |          | ✓           |             |
| After day 28 Phone Call <sup>3</sup>   |           |                   |          |             | ✓           |
| Clinical notes Review* <sup>3</sup>    |           |                   |          |             | ✓           |
| Adverse event assessments <sup>3</sup> |           |                   | ✓        |             | ✓           |
| SAE Follow-up <sup>3</sup>             |           |                   | ✓        |             | ✓           |

\*Country dependent

<sup>1</sup>Completed by recruiter

<sup>2</sup>Completed by participant, includes standardised written health-related quality of life assessment and documents resource use

<sup>3</sup>Completed by trial team (CI/PI/coordinator), Day 28 call includes standardised verbal health-related quality of life assessment

### Baseline Assessment (Day 1)

After obtaining written, informed consent, recruiters will complete a baseline Case Report Form (CRF). This will include the required information for randomisation: age; relevant comorbidities; duration of symptoms; clinician's rating of severity of ILI as mild, moderate or severe. In addition, the CRF will ascertain participant's/parent's severity grading for:

1  
2  
3 fever, running or congested nose, sore throat, headache, cough, shortness of breath, muscle  
4 ache and pains, sweats/chills, diarrhoea, nausea and/or vomiting, abdominal pain, low  
5 energy/tired, not sleeping well, dizziness, feeling generally unwell (grading = no, minor,  
6 moderate, major problem); information about any usual care advice given to the participant;  
7 and type of health care coverage (e.g. public, private or mixed). The symptom questions will  
8 be supplemented with child-specific questions so that the Canadian Acute Respiratory Illness  
9 Flu Scale will be completed for children  $\leq 12$  years of age<sup>31</sup>.

10  
11  
12  
13  
14  
15 Additionally, clinical examination findings will be recorded including: temperature and the  
16 way it was measured (oral, ear or axilla); use of antipyretics in the last 4 hours; pulse rate;  
17 weight ( $\leq 12$  years of age or in cases of uncertainty); height; smoking status; gender; and  
18 whether they have had flu vaccination within six months and pneumococcal vaccination  
19 within five years.

20  
21  
22  
23  
24 The recruiter will provide antiviral medication according to the participant's group allocation  
25 and standardised instructions on how to take the medication. The recruiter will also take an  
26 oropharyngeal and a nasal swab (COPAN®) from those  $< 16$  years of age and a  
27 nasopharyngeal swab (COPAN®) from those  $\geq 16$  years of age. All swabs will be placed in  
28 3mL universal transport media (UTM) and transported to a local laboratory for storage.  
29 Finally, they will instruct participants how to complete the Symptom Diary and give  
30 information about telephone follow-up assessments.

### 31 32 33 34 35 36 37 **Diary (Day 1 – 14) and Follow-up**

38  
39 There is no requirement for participants to attend a face-to-face follow-up visit as part of their  
40 study participation, as all subsequent measurements will be ascertained by self-completed  
41 diary-based questionnaires and through telephone calls from the local trial team.

42  
43  
44  
45 Participants (or their legal guardian or their carer) will be asked to complete a Symptom  
46 Diary from day 1 (baseline) through to day 14 after randomisation. The following data points  
47 will be collected once: expectations of treatment benefit; ethnicity; employment status;  
48 cohabitation; pregnancy and stage; and current long-term medication. The following data  
49 points are collected daily in the diary: severity of selected ILI symptom; quality of life (EQ  
50 Visual Analogue Scale (VAS)); return to usual daily activity; prescription medication use  
51 (including antibiotics); use of OTC medication or remedies; adherence to trial medication and  
52  
53  
54  
55  
56  
57  
58  
59  
60

1  
2  
3 potential side-effects (up to day 7). The following data points will be collected weekly:  
4 quality of life (using EQ 5D 5L index (respondents >12 years) or EQ 5D 3Y (respondents  
5 ≤12 years)); effect of the participants' symptoms on usual daily activities; health care  
6 resource use; out-of-pocket expenditure; and ILI state of people in the same household.  
7  
8  
9

10 Participants and legal guardians will be telephoned on day three (+/- one day) (with day one  
11 defined as the day they were recruited into the study) to offer support with Symptom Diary  
12 completion and to check for any urgent issues. They will also be telephoned on day 14 (up to  
13 day 28) and asked on what day they returned to their usual daily activity, if and when their  
14 fever, head- and muscle-ache symptoms reduced to minor severity or less to ensure the  
15 primary end point is collected for all participants, and to ascertain any Serious Adverse  
16 Events (SAEs) in the preceding two weeks. Participants will receive a final telephone call on  
17 or after day 28 to complete a verbal EQ-5D-5L/3Y and VAS, to answer remaining questions  
18 about symptom resolution if needed, and about their trial participation and consent process as  
19 part of a process evaluation (see below). The trial team will ask whether participants have had  
20 a recurrence of their symptoms during this time and whether they have been admitted into  
21 hospital as a result of their symptoms.  
22  
23  
24  
25  
26  
27  
28  
29  
30

31 Participants who have visited the hospital with complications possibly related to ILI and who  
32 have had a chest X-ray will have their primary care clinical records examined by the trial  
33 team for confirmation of relevant diagnoses of complications, including pneumonia.  
34  
35  
36

### 37 **Laboratory testing and point of care test (POCT)**

38  
39 Once the swabs have been received at local laboratories, samples will be frozen and stored at  
40 -70°C (-20°C is acceptable if there is no deep-freezer). After each flu season, samples will be  
41 transported to the Laboratory of Medical Microbiology, University of Antwerp, Belgium for  
42 analysis. Each participant's swab(s) will be analysed using a Multiplex RT-PCR for detection  
43 of pathogen genes by TaqMan® technology to identify whether or not the participant is  
44 infected with influenza A or B, with other respiratory viruses<sup>ii</sup>, or with bacteria<sup>iii</sup>.  
45  
46  
47  
48  
49

### 50 **Interviews and Qualitative assessment**

51  
52 As part of the day 28 telephone call to the participants or legal guardians or carers, questions  
53 will be asked about motivation for participating in the ALIC<sup>4</sup>E study, what influenced that  
54 decision, and questions related to research participation during a pandemic.  
55  
56  
57  
58  
59  
60

1  
2  
3 All participating clinicians will be asked to complete a brief questionnaire, and a sub-sample  
4 will be asked their perspectives on the trial process, their views of influenza management in  
5 primary care, and participation in pandemic research.  
6  
7

### 8 **Safety and discontinuation or withdrawal of participants from trial treatment**

9  
10 Oseltamivir has a well-documented safety profile and is a commonly used medication in a  
11 primary care setting. As a result, no non-serious adverse events will be recorded in this study.  
12 All Serious Adverse Events (SAEs) occurring during the 28 days participants are enrolled on  
13 the trial will be recorded. It will be left to the Investigator's clinical judgment to decide  
14 whether or not a symptom or side effect is of sufficient severity to require the participant's  
15 removal from treatment. If the participant is withdrawn due to an adverse event (AE), the  
16 investigator will arrange for follow-up visits or telephone calls until the adverse event has  
17 resolved or stabilised or until the end of their trial participation, whichever is later. If the  
18 participant is withdrawn due to an AE, follow up data will continue to be collected and their  
19 information will be included for the purpose of the intention to treat analysis. Participants  
20 have the right to withdraw from the study at any time without any prejudice to current and  
21 future health care.  
22  
23  
24  
25  
26  
27  
28  
29  
30

### 31 **Response Adaptive-Platform Trial Design**

32  
33  
34 An "adaptive platform trial" enables multiple interventions for the same indication to be  
35 tested simultaneously within a master protocol, and often includes the capacity to add, or  
36 drop, study arms while the study is in progress<sup>32,33</sup>. Platform trials provide an effective  
37 framework to study patient heterogeneity in outcomes, with the goal of determining the best  
38 treatment for various subgroups of patients. In addition, platform trial designs can incorporate  
39 response adaptive randomization in order to randomize more participants to the best  
40 performing interventions during the course of the trial. This can increase statistical power and  
41 efficiency of the trial, as well as lead to better patient outcomes over the course of the study<sup>34</sup>.  
42  
43  
44  
45  
46  
47

48 We chose an adaptive platform trial design because it provided flexibility to evaluate  
49 additional interventions in the trial, should interventions emerge that are suitable to pragmatic  
50 evaluation in primary care. Additionally, the design provides the ability to prospectively  
51 identify particular subgroups of interest that may receive benefit from antiviral agents, as  
52 opposed to estimating a single overall effect. This is done by incorporating a Bayesian  
53 modelling approach, combined with response adaptive randomization based on pre-specified  
54  
55  
56  
57  
58  
59  
60

1  
2  
3 participant characteristics. There will be multiple interim analyses during recruitment;  
4 planned after every 750 patients and/or between flu seasons.  
5

6  
7 In ALIC<sup>4E</sup>, participants will be initially randomised in a 1:1 ratio to the two arms, with  
8 stratification by subgroup and random blocks. Each arm will maintain at least a 10%  
9 probability of randomisation within each subgroup throughout the course of the trial. Arm  
10 superiority will be assessed by subgroup and may be declared superior in some subgroups,  
11 but not within others. If, at an interim analysis, an arm meets the superiority criterion for one  
12 of the treatments, randomization probabilities may be modified for those subgroups such that  
13 a minimum of 10% of participants are allocated to the inferior arm, with the remaining  
14 allocation to the superior arm (a maximum of 90%, if two arms). In this event, stratification  
15 and blocking will no longer occur within these subgroups. This will ensure the majority of  
16 participants receive the best-known therapy, yet the trial design will still allow the assessment  
17 of seasonal variation and population changes in the study population over time. In addition,  
18 we will still be able to collect data about costs and health related behaviours (including health  
19 care seeking) associated with a poorly performing arm.  
20  
21  
22  
23  
24  
25  
26  
27

28 New comparator arms may enter the trial as determined by the Trial Steering Committee.  
29 Eligible therapies will include newly approved treatments for ILI or therapies recommended  
30 by public health agencies during an influenza pandemic. If an arm is added to the trial, there  
31 is a pre-specified algorithm determining randomization ratios, and for activating response  
32 adaptive randomization within subgroups to the respective treatment arms. The operating  
33 characteristics of the trial will be updated via simulation; however, the general structure of  
34 the trial does not change. Response adaptive randomization may be activated in subgroups  
35 without satisfying superiority criterion only if the number of interventions is greater than two.  
36  
37  
38  
39  
40  
41

#### 42 **Justification of sample size**

43  
44

45 A sample size calculation for the planned design is not available using traditional formulas.  
46 Instead, simulations must be used to estimate the operating characteristics of the adaptive  
47 algorithm, including estimates of how many participants with particular characteristics are  
48 required in order to detect differences in treatments. In these simulations, the pre-specified  
49 algorithm will be applied such that the randomization of participants with particular pre-  
50 specified characteristics will depend on the number of arms and the collected outcome data.  
51 In addition, the algorithm will determine when arms are dropped for futility, when an  
52  
53  
54  
55  
56  
57  
58  
59  
60

1  
2  
3 intervention is declared superior, and will have a process for adding a new intervention to the  
4 platform trial.  
5

6  
7 Between 2500 and 4500 participants will be recruited during three consecutive winters. This  
8 range has been chosen to ensure sufficient power for comparisons in the overall population,  
9 as well as within the pre-specified subgroups. Given the nature of the study's adaptive design  
10 and the desire to ensure sufficient power for multiple hypotheses across several subgroups,  
11 the number of participants needed to be recruited is a complex multi-dimensional calculation.  
12 Hence, numerous simulations were conducted to calculate power under various plausible  
13 scenarios. The maximum target of 4500 participants was chosen from these simulations  
14 because it gave over 80% power for many of the subgroup analyses with a one day benefit in  
15 terms of symptoms relief from oseltamivir. 2500 participants will provide over 99% power  
16 for comparing the primary end point in the overall study population where there is at least  
17 one day benefit of oseltamivir for participants with confirmed influenza. This number will  
18 also provide >80% power for all subgroups if there is a 2-day benefit of oseltamivir in  
19 participants with confirmed influenza. We based these simulations on the assumption that  
20 50% of patients will have confirmed influenza and 50% of patients will have ILI originating  
21 from another viral infection.  
22  
23  
24  
25  
26  
27  
28  
29  
30

### 31 32 **Statistical Analysis** 33

34  
35 The primary analysis will be intention to treat (ITT) and will include all randomised  
36 participants in the treatment arm they were assigned regardless of treatment taken. Secondary  
37 analyses will include the subset of the ITT population with confirmed influenza. There will  
38 be at least one interim analysis when accrual and data collection for each season is complete  
39 and before recruitment opens in the subsequent flu season. If accrual is rapid and large  
40 numbers of patients are enrolled, for example in the case of flu pandemic, more than one  
41 interim analysis may be conducted during a flu season, each occurring after approximately an  
42 additional 750 patients have been enrolled. The adaptive randomisation probabilities may be  
43 updated and arms assessed for superiority after each interim analysis.  
44  
45  
46  
47  
48  
49

50 The composite primary endpoint of return to usual activities with resolution of any fever,  
51 muscle- and headache to a minor problem or less will be modelled according to a Bayesian  
52 piece-wise exponential model. This is a survival time model that allows the baseline hazard  
53 to vary across follow-up. The hazard for reaching the primary endpoint will be modelled  
54  
55  
56  
57  
58  
59  
60



1  
2  
3 during four time intervals – 0-2 day, 3-5 days, 6-10 days, and 11 or more days. Participants  
4 not reaching the primary endpoint by 28 days (including participants that die) will be  
5 considered censored at 28 days. Participants who withdraw, are lost to follow-up, or not  
6 evaluated for the primary endpoint for any reason will be considered censored at their last  
7 contact date or 28 days, whichever is earlier.  
8  
9  
10

## 11 **Cost-Effectiveness Analysis**

12  
13  
14  
15 Cost-effectiveness analysis (CEA) will compare the direct medical costs and health outcomes  
16 (in terms of number of days where ILI limits usual activities and in terms of Quality Adjusted  
17 Life Years gained) between the different arms. The analysis will use data from the trial  
18 (resource use, EQ-5D-5L, EQ-5D-3Y and VAS scores), and other relevant data from the  
19 countries in which the trial is set (e.g., unit costs, and type of health care provided within  
20 each country). Potential differences in repeated measures (EQ-5D-5L, EQ-5D-3Y and VAS)  
21 between arms will be investigated on a per-participant basis using mixed effects models.  
22 Valuation of quality of life (using a standardized instrument for measuring generic health  
23 status) will be done in accordance with the guidelines of the Euroqol group<sup>35</sup>, using the ‘EQ-  
24 5D-5L Crosswalk Index Value Calculator’.  
25  
26  
27  
28  
29  
30

31  
32 Uncertainty will be explored using bootstrapping to represent clouds of Incremental Cost-  
33 effectiveness Ratios (ICERs) on the cost-effectiveness plane, as well as cost-effectiveness  
34 acceptability curves. Subgroup analyses will be performed to acknowledge heterogeneity  
35 within each arm of the trial (e.g., age, severity, country). Value of perfect information  
36 analysis may also be performed to identify which sources of uncertainty should be reduced  
37 through additional research to efficiently improve decision making.  
38  
39  
40  
41

## 42 **Discussion**

43  
44  
45 The ALIC<sup>4</sup>E Trial will be the first large-scale, international, non-industry sponsored,  
46 pragmatic, randomised trial of (cost-)effectiveness of adding oseltamivir to best usual  
47 primary care for people suffering from ILI.  
48  
49  
50

51 ALIC<sup>4</sup>E will be an open trial in order to approximate effects in conditions close to those of  
52 usual care in order to determine real-world estimates of (cost-) effectiveness. Open trials have  
53 been criticised because, should a treatment appear beneficial, it may not be clear if the effect  
54 resulted from biological mechanism or because of a placebo effect. When considering the  
55  
56  
57  
58  
59  
60



1  
2  
3 possible outcomes of ALIC<sup>4</sup>E, if no benefit is found in the antiviral arm, despite the  
4 comparator usual care arm not being enhanced by the possible effects of a placebo, then  
5 prescribing the antiviral agent should not be recommended. On the other hand, if a benefit  
6 from an antiviral agent is identified in the pragmatic trial, given that the drug's efficacy will  
7 have already been demonstrated in many placebo controlled trials and that the drug's  
8 mechanisms of action is known and is specific to the condition under study, then it would be  
9 obtuse to suggest that any benefit ALIC<sup>4</sup>E may identify derives from the placebo effect, and  
10 not from the antiviral's effect on influenza.  
11  
12  
13  
14  
15  
16

17 The lack of cost-effectiveness analyses alongside clinical trials, and given that children, older  
18 people and people with co-morbidities are underrepresented in studies that have been done,  
19 has once again been highlighted after the WHO's decision to downgrade the status of  
20 oseltamivir<sup>9,36</sup>. Despite the lack of trial evidence, the 2017 WHO Model List of Essential  
21 Medicines states that the use of oseltamivir should be restricted to severe illness due to  
22 confirmed, or suspected influenza virus infection in critically ill hospitalised patients<sup>10</sup>.  
23 Another report quoting the WHO states: "unless new information supporting the use in  
24 seasonal and pandemic outbreaks is provided, the next Expert Committee might consider  
25 oseltamivir for deletion"<sup>9</sup>. The current UK and US guidelines recommend treatment of  
26 defined subgroups of frail patients and patients with increased risk for complications<sup>6,37</sup>.  
27 Because the evidence base for these recommendations is incomplete, withholding treatment  
28 from these or other patients may possibly deny them benefit. By including a 'best usual  
29 primary care' arm, our study will determine the added benefit of antiviral agents over and  
30 above current practice for seasonal and potentially pandemic influenza. This information will  
31 be of great importance to the delivery of primary care for ILI, as well as enhance the evidence  
32 base around advocating self-care. In many countries, patients with ILI symptoms are advised  
33 not to consult but to self-manage, and patients with additional risk factors are seldom  
34 routinely treated with an antiviral agent. This is largely because of an absence of evidence  
35 about the cost-effectiveness overall and in sub-groups of interest.  
36  
37  
38  
39  
40  
41  
42  
43  
44  
45  
46  
47  
48

49 The virulence, spread and type of circulating influenza strains varies from season to season.  
50 ALIC<sup>4</sup>E aims to recruit over three winter/influenza seasons in 15 countries, thereby obtaining  
51 widely applicable data allowing us to determine whether any benefit or otherwise of antiviral  
52 agents is influenced by season. Furthermore, the aim is to include a wide age-range of  
53 participants, as well as those with co-morbidities. Additionally, in the event of an influenza  
54  
55  
56  
57  
58  
59  
60

1  
2  
3 pandemic, or should additional intervention arms be included, a decision could be made to  
4 increase the maximum sample size.  
5  
6

7  
8 The adaptive design offers several advantages over a traditional study design. Recruitment  
9 into a particular arm can be stopped once a pre-determined level of certainty about the  
10 effectiveness or non-effectiveness of treatment in that arm has reached a pre-defined  
11 estimated precision. Adaptive randomisation will increase the chances of participants being  
12 allocated to arms where their information will be most useful and to the intervention that is  
13 most effective for them. This can lead to better patient care and better patient outcomes as the  
14 trial progresses. Secondly, the platform design allows new intervention arms to be added to  
15 the trial, benefiting from comparisons with existing treatment arms in a head to head way.  
16 This flexibility extends to a potential pandemic situation where additional or alternative  
17 interventions may be added according to governmental or public health recommendations. In  
18 this way, the study will remain current and relevant to clinical practice and evolving  
19 circumstances throughout.  
20  
21  
22  
23  
24  
25  
26

27  
28 ALIC<sup>4</sup>E will be novel in many ways. It will provide critical information about the clinical and  
29 cost-effectiveness of adding oseltamivir to best current ILI management in conditions that  
30 approximate usual care, both overall, as well as in important, pre-specified subgroups.  
31 ALIC<sup>4</sup>E is likely therefore to enhance the evidence base supporting an important and  
32 common area of clinical practice.  
33  
34  
35  
36  
37  
38  
39  
40

## 41 **Declarations**

### 42 **Competing interests**

43  
44 The authors declare that they have no competing interests.  
45  
46

### 47 **Funding**

48  
49 This work was supported by the European Commission FP7 Programme grant number  
50 HEALTH-F3-2013-602525.  
51  
52

### 53 **Authors' contributions**

1  
2  
3 CCB and TV are co-chief investigators of this trial and act as guarantors of the study in its  
4 entirety. CCB and TV led the development of the research question, study design and  
5 obtaining the funding along with AV, JC, PB, HG, MJ and PL. EB, JC and AV manage the  
6 trial and coordinate the operational delivery of the study protocol to the networks co-  
7 ordinating centres. BS and JH are the trial statisticians. PB provides health economics input.  
8 MI provides support with sampling and analysis. RMA, CBr, SCh, SC, AC, MD, MDP, ADS,  
9 NF, DG, MGC, ML, FMT, AM, JP, MP, RRJ, PDS, AT, PTL, DV are representatives of the  
10 collaborating co-ordinating centres responsible for their networks participation in the trial.  
11 EB and AV drafted the manuscript, supervised by CCB. All other authors provided critical  
12 review and final approval of the manuscript.  
13  
14  
15  
16  
17  
18  
19

## 20 **Acknowledgements**

21  
22  
23 In addition to the authors, we would like to acknowledge the contribution of the other  
24 members of the 21 ALIC<sup>4</sup>E co-ordinating centres: Bohumil Seifert, Lars Bjerrum, Mike  
25 Moore, Christos Lionis, Katalin Bezzegh, Tom Fahey, Florian Nicula, Carl Llor, Heiner  
26 Bucher, Sabine de Weirdt, Jane Barnett, Nicola Blakey, Pascale Bruno, Christine Pintaric,  
27 Bernadett Kovács, Réka Pauer, Dovile Narvilaite, Nicolay Jonassen Harbin, Anna Gryko,  
28 Basia Pytel, Ania Kowalczyk, Anca Balan, Monica Groza, Patricia Fernandez-Vandellos,  
29 Carmen Rodriguez-tenreiro Sanchez, Rosa Morros, Helena Pera, Anna Garcia Sangenis,  
30 Sofia Sundvall, Filothei Voltyraki, Irene Vasilaki, Antonios Bertias and Ioanna Tsiligianni.  
31 We also acknowledge and thank the hard work and dedication of all the networks recruitment  
32 teams, practices and local laboratories.  
33  
34  
35  
36  
37  
38  
39

40 The authors would like to acknowledge the contribution of the Trial Steering Committee  
41 members, namely Patrick Bindels, Gordon Taylor, Åke Örtqvist and Keith Shankland  
42 (patient/public representative) and the Independent Data Monitoring Committee members  
43 Deborah Ashby, Sonia Saxena and Simon Gates. Also all the members of the Patient and  
44 Public Involvement group that contributed to the study design and development.  
45  
46  
47  
48

49 The authors would also like to acknowledge the other members of the collaborative  
50 PREPARE work packages, in particular: Nina Gobat and Micaela Gal (WP1); Mandy  
51 Kuijstermans, Pieter Moons and Veronique Nussenblatt (WP7); and Frank Leus, Joost  
52 Schotsman, and Susan van Hemert (WP8). Finally we acknowledge the help and support  
53 from the Nuffield Department of Primary Care Health Sciences and Primary Care Clinical  
54  
55  
56  
57  
58  
59

1  
2  
3 Trials Unit, University of Oxford in particular Sonya Beecher and Julie Allen for their  
4 respective administrative and trial management support.  
5

## 6 7 **Trial Status**

8  
9 Recruitment started in January 2016 and is expected to be completed by May 2018. The first  
10 two seasons assessed only oseltamivir as an antiviral. There are currently no other suitable  
11 antivirals available to evaluate within this trial. The current protocol is version 4.1 02-DEC-  
12 2017.  
13  
14  
15

## 16 17 **References**

- 18  
19  
20  
21 1. Antonova EN, Rycroft CE, Ambrose CS, et al. Burden of paediatric influenza in Western Europe: a  
22 systematic review. *BMC Public Health* 2012;12:968. doi: 10.1186/1471-2458-12-968  
23 <https://doi.org/10.1186/1471-2458-12-968>
- 24 2. World Health Organisation. Factsheet. <http://www.who.int/mediacentre/factsheets/fs211/en/>  
25 (accessed 10 Aug 2017).
- 26 3. Centers for Disease Control and Prevention (CDC). Estimates of deaths associated with seasonal  
27 influenza --- United States, 1976-2007. *MMWR Morb Mortal Wkly Rep* 2010;59(33):1057-62.  
28 [published Online First: 2010/08/28]
- 29 4. Schanzer DL, Langley JM, Tam TW. Co-morbidities associated with influenza-attributed mortality,  
30 1994-2000, Canada. *Vaccine* 2008;26(36):4697-703. doi: 10.1016/j.vaccine.2008.06.087  
31 [published Online First: 2008/07/16]
- 32 5. Adriaenssens N, Coenen S, Kroes AC, et al. European Surveillance of Antimicrobial Consumption  
33 (ESAC): systemic antiviral use in Europe. *J Antimicrob Chemother* 2011;66(8):1897-905. doi:  
34 10.1093/jac/dkr190 [published Online First: 2011/05/31]
- 35 6. The National Institute for Health and Care Excellence. Amantadine, oseltamivir and zanamivir for  
36 the treatment of influenza. Technology appraisal guidance 168., 2009.  
37 <http://nice.org.uk/guidance/ta168> (accessed 10 Aug 2017).  
38
- 39 7. Kramarz P, Monnet D, Nicoll A, et al. Use of oseltamivir in 12 European countries between 2002  
40 and 2007 – lack of association with the appearance of oseltamivir-resistant influenza  
41 A(H1N1) viruses. *Eurosurveillance* 2009;14(5):19112.  
42 doi:<https://doi.org/10.2807/ese.14.05.19112-en>
- 43 8. Stephenson I, Clark TW, Pareek M. Antiviral treatment and prevention of seasonal influenza: A  
44 comparative review of recommendations in the European Union. *Journal of Clinical Virology*  
45 2008;42(3):244-48. doi: <https://doi.org/10.1016/j.jcv.2008.04.001>
- 46 9. Kmietowicz Z. WHO downgrades oseltamivir on drugs list after reviewing evidence. *BMJ* 2017;357  
47 <http://www.bmj.com/content/bmj/357/bmj.j2841.full.pdf> doi: 10.1136/bmj.j2841
- 48 10. World Health Organization. WHO model list of essential medicines 20th list, 2017.  
49 [http://www.who.int/medicines/publications/essentialmedicines/20th\\_EML2017\\_FINAL\\_ammendedAug2017.pdf?ua=1](http://www.who.int/medicines/publications/essentialmedicines/20th_EML2017_FINAL_ammendedAug2017.pdf?ua=1) (accessed 08 Dec 2017).
- 50 11. McNicholl IR, McNicholl JJ. Neuraminidase inhibitors: zanamivir and oseltamivir. *Ann*  
51 *Pharmacother* 2001;35(1):57-70. doi: 10.1345/aph.10118 [published Online First:  
52 2001/02/24]
- 53 12. Roche Products Limited. SPC Tamiflu 30 mg, 45 mg and 75 mg Hard Capsules, 2017.  
54 <https://www.medicines.org.uk/emc/medicine/20294> (accessed 10 Aug 2017).  
55  
56  
57  
58  
59

13. Jefferson T, Jones MA, Doshi P, et al. Neuraminidase inhibitors for preventing and treating influenza in healthy adults and children. *Cochrane Database Syst Rev* 2014(4):Cd008965. doi: 10.1002/14651858.CD008965.pub4 [published Online First: 2014/04/11]
14. Jefferson T, Jones M, Doshi P, et al. Oseltamivir for influenza in adults and children: systematic review of clinical study reports and summary of regulatory comments. *Bmj* 2014;348:g2545. doi: 10.1136/bmj.g2545 [published Online First: 2014/05/09]
15. Dobson J, Whitley RJ, Pocock S, et al. Oseltamivir treatment for influenza in adults: a meta-analysis of randomised controlled trials. *Lancet* 2015;385(9979):1729-37. doi: 10.1016/s0140-6736(14)62449-1 [published Online First: 2015/02/03]
16. Okoli GN, Otete HE, Beck CR, et al. Use of neuraminidase inhibitors for rapid containment of influenza: a systematic review and meta-analysis of individual and household transmission studies. *PLoS One* 2014;9(12):e113633. doi: 10.1371/journal.pone.0113633 [published Online First: 2014/12/10]
17. The Academy of Medical Sciences and Wellcome Trust. Use of neuraminidase inhibitors in influenza, October 2015. <https://acmedsci.ac.uk/file-download/38069-561595082cd83.pdf> (accessed 10 Aug 2017).
18. Abbasi K. The missing data that cost \$20bn. *BMJ : British Medical Journal* 2014;348 <http://www.bmj.com/content/bmj/348/bmj.g2695.full.pdf> doi: 10.1136/bmj.g2695
19. PREPARE Consortium. Platform for European Preparedness Against (Re-) emerging Epidemics. <https://www.prepare-europe.eu/> (accessed 10 Aug 2017).
20. GRACE-LRTI Consortium. Genomics to combat Resistance against Antibiotics in Community-acquired LRTI in Europe [Available from: <http://www.grace-lrti.org> (accessed 10 Aug 2017)].
21. Nuttall J, Hood K, Verheij TJ, et al. Building an international network for a primary care research program: reflections on challenges and solutions in the set-up and delivery of a prospective observational study of acute cough in 13 European countries. *BMC Family Practice* 2011;12(1):78. doi: 10.1186/1471-2296-12-78
22. European Centre for Disease Prevention and Control. Seasonal Influenza Surveillance Reports. <https://ecdc.europa.eu/en/seasonal-influenza/surveillance-reports-and-disease-data> (accessed 08 Dec 2017).
23. Official Journal of European Union. Commission implementing decision of 8 August 2012 amending Decision 2002/253/EC laying down case definitions for reporting communicable diseases to the Community network under Decision No 2119/98/EC of the European Parliament and of the Council (notified under document C(2012) 5538)., 2012:16. <http://eur-lex.europa.eu/legal-content/EN/TXT/PDF/?uri=CELEX:32012D0506&qid=1428573336660&from=EN#page=16> (accessed 08 Feb 2018).
24. Casalegno JS, Eibach D, Valette M, et al. Performance of influenza case definitions for influenza community surveillance: based on the French influenza surveillance network GROG, 2009-2014. *Euro Surveill* 2017.
25. Aguilera JF, Paget WJ, Mosnier A, et al. Heterogeneous case definitions used for the surveillance of influenza in Europe. *Eur J Epidemiol* 2003;18(8):751-4. [published Online First: 2003/09/17]
26. Berry DA. Bayesian clinical trials. *Nat Rev Drug Discov* 2006;5(1):27-36. doi: 10.1038/nrd1927 [published Online First: 2006/02/18]
27. Krumholz HM. Neuraminidase inhibitors for influenza. *BMJ : British Medical Journal* 2014;348 doi: 10.1136/bmj.g2548
28. Thorpe KE, Zwarenstein M, Oxman AD, et al. A pragmatic-explanatory continuum indicator summary (PRECIS): a tool to help trial designers. *J Clin Epidemiol* 2009;62(5):464-75. doi: 10.1016/j.jclinepi.2008.12.011 [published Online First: 2009/04/08]

- 1  
2  
3 29. Little P, Williamson I, Warner G, et al. Open randomised trial of prescribing strategies in  
4 managing sore throat. *Bmj* 1997;314(7082):722-7. [published Online First: 1997/03/08]  
5 30. Little P, Rumsby K, Kelly J, et al. Information leaflet and antibiotic prescribing strategies for acute  
6 lower respiratory tract infection: a randomized controlled trial. *Jama* 2005;293(24):3029-35.  
7 doi: 10.1001/jama.293.24.3029 [published Online First: 2005/06/24]  
8 31. Jacobs B, Young NL, Dick PT, et al. Canadian Acute Respiratory Illness and Flu Scale (CARIFS):  
9 development of a valid measure for childhood respiratory infections. *J Clin Epidemiol*  
10 2000;53(8):793-9. [published Online First: 2000/08/16]  
11 32. Berry SM, Connor JT, Lewis RJ. The platform trial: an efficient strategy for evaluating multiple  
12 treatments. *Jama* 2015;313(16):1619-20. doi: 10.1001/jama.2015.2316 [published Online  
13 First: 2015/03/24]  
14 33. Woodcock J, LaVange LM. Master Protocols to Study Multiple Therapies, Multiple Diseases, or  
15 Both. *New England Journal of Medicine* 2017;377(1):62-70. doi: 10.1056/NEJMra1510062  
16 34. Saville BR, Berry SM. Efficiencies of platform clinical trials: A vision of the future. *Clin Trials*  
17 2016;13(3):358-66. doi: 10.1177/1740774515626362 [published Online First: 2016/02/26]  
18 35. EuroQol Research Foundation. EuroQol EQ-5D. <https://euroqol.org/euroqol/2017> (accessed 27  
19 Nov 2017).  
20 36. Ebell MH. WHO downgrades status of oseltamivir. *Bmj* 2017;358:j3266. doi: 10.1136/bmj.j3266  
21 [published Online First: 2017/07/14]  
22 37. Fiore AE, Fry A, Shay D, et al. Antiviral agents for the treatment and chemoprophylaxis of  
23 influenza --- recommendations of the Advisory Committee on Immunization Practices (ACIP).  
24 *MMWR Recomm Rep* 2011;60(1):1-24. [published Online First: 2011/01/21]  
25  
26

27 Figure 1. ALIC<sup>4</sup>E European Networks. Coordinating centres are in Oxford, UK and Utrecht,  
28 The Netherlands. The ALIC<sup>4</sup>E recruiting networks include: Belgium (Antwerp, Ghent);  
29 Czech Republic; Denmark; France; Greece; Hungary; Ireland; Lithuania; Netherlands,  
30 Norway; Poland (Bialystok, Lodz); Spain (Barcelona, Catalonia, Santiago de Compostela);  
31 Sweden; Switzerland; and the UK (Oxford, Southampton and Cardiff).  
32  
33  
34  
35

## 36 Endnotes

37  
38  
39 <sup>i</sup> Heart Disease/ Diabetes/Chronic respiratory condition (e.g. asthma, COPD)/Hepatic, hematologic, neurologic  
40 or neurodevelopmental condition/Stroke or Transient Ischemic Attack/Overnight hospital admission in the last  
41 year.

42 <sup>ii</sup> Rhinovirus, Coronavirus (NL63/229E/OC43/HKU1), Parainfluenza (1, 2, 3, 4), Human Metapneumovirus A/B,  
43 Bocavirus, Respiratory Syncytial Viruses A/B, Adenovirus, Enterovirus, Parechovirus.

44 <sup>iii</sup> *Mycoplasma pneumoniae*, *Chlamydia pneumoniae*, *Streptococcus pneumoniae*, *Haemophilus influenzae type*  
45 *B*, *Staphylococcus aureus*.  
46  
47  
48  
49  
50  
51  
52  
53  
54  
55  
56  
57  
58  
59  
60

1  
2  
3  
4  
5  
6  
7  
8  
9  
10  
11  
12  
13  
14  
15  
16  
17  
18  
19  
20  
21  
22  
23  
24  
25  
26  
27  
28  
29  
30  
31  
32  
33  
34  
35  
36  
37  
38  
39  
40  
41  
42  
43  
44  
45  
46  
47  
48  
49  
50  
51  
52  
53  
54  
55  
56  
57  
58  
59  
60

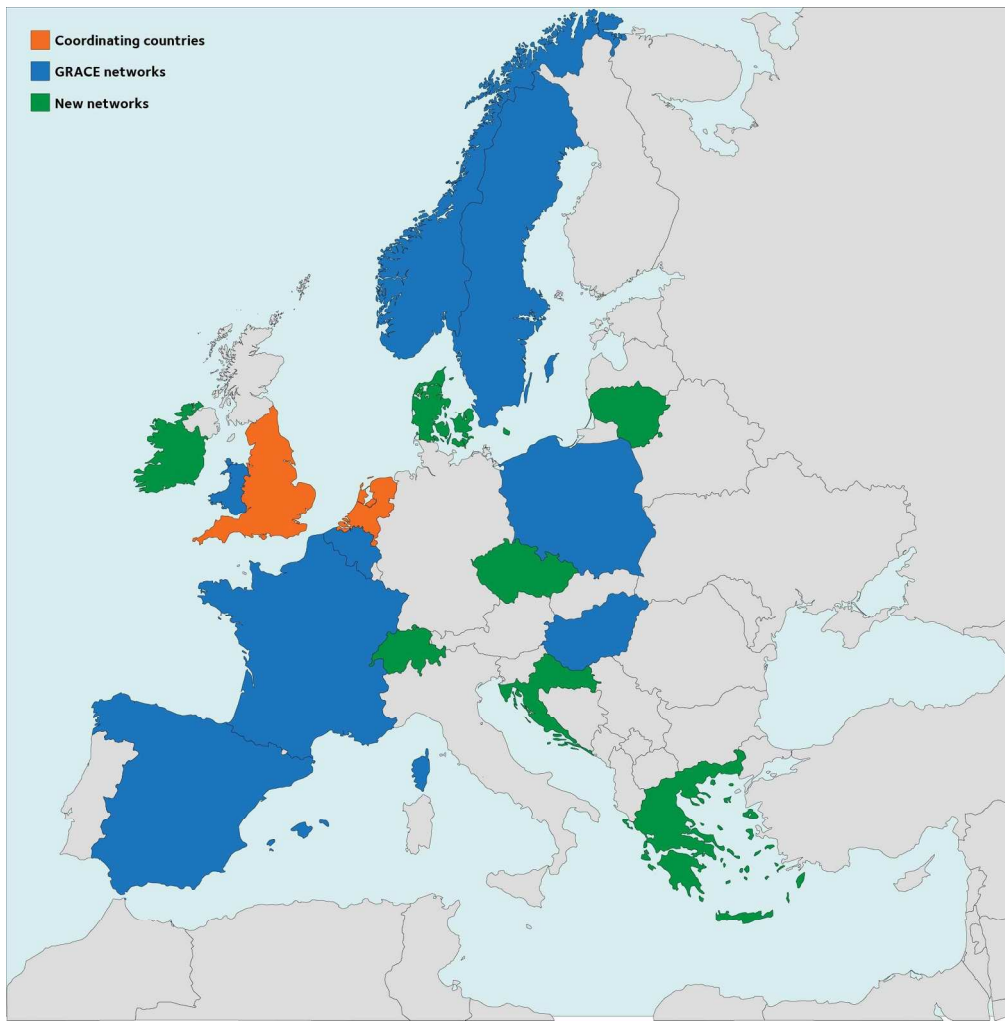

Figure 1. ALIC4E European Networks. Coordinating centres are in Oxford, UK and Utrecht, The Netherlands. The ALIC4E recruiting networks include: Belgium (Antwerp, Ghent); Czech Republic; Denmark; France; Greece; Hungary; Ireland; Lithuania; Netherlands, Norway; Poland (Bialystok, Lodz); Spain (Barcelona, Catalonia, Santiago de Compostela); Sweden; Switzerland; and the UK (Oxford, Southampton and Cardiff).

171x173mm (300 x 300 DPI)



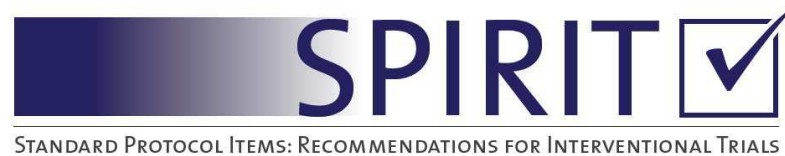

SPIRIT 2013 Checklist: Recommended items to address in a clinical trial protocol and related documents\*

| Section/item                      | Item No | Description                                                                                                                                                                                                                                                                              | Addressed on page number        |
|-----------------------------------|---------|------------------------------------------------------------------------------------------------------------------------------------------------------------------------------------------------------------------------------------------------------------------------------------------|---------------------------------|
| <b>Administrative information</b> |         |                                                                                                                                                                                                                                                                                          |                                 |
| Title                             | 1       | Descriptive title identifying the study design, population, interventions, and, if applicable, trial acronym                                                                                                                                                                             | _____1_____                     |
| Trial registration                | 2a      | Trial identifier and registry name. If not yet registered, name of intended registry                                                                                                                                                                                                     | _____3_____                     |
|                                   | 2b      | All items from the World Health Organization Trial Registration Data Set                                                                                                                                                                                                                 | __1, 3, 8, 18, 23, 30, 34, 38__ |
| Protocol version                  | 3       | Date and version identifier                                                                                                                                                                                                                                                              | _____2_____                     |
| Funding                           | 4       | Sources and types of financial, material, and other support                                                                                                                                                                                                                              | _____3, 35__                    |
| Roles and responsibilities        | 5a      | Names, affiliations, and roles of protocol contributors                                                                                                                                                                                                                                  | _____3, 7_____                  |
|                                   | 5b      | Name and contact information for the trial sponsor                                                                                                                                                                                                                                       | _____7_____                     |
|                                   | 5c      | Role of study sponsor and funders, if any, in study design; collection, management, analysis, and interpretation of data; writing of the report; and the decision to submit the report for publication, including whether they will have ultimate authority over any of these activities | _____n/a_____                   |
|                                   | 5d      | Composition, roles, and responsibilities of the coordinating centre, steering committee, endpoint adjudication committee, data management team, and other individuals or groups overseeing the trial, if applicable (see Item 21a for data monitoring committee)                         | _____33_____                    |



1  
2  
3  
4  
5  
6  
7  
8  
9  
10  
11  
12  
13  
14  
15  
16  
17  
18  
19  
20  
21  
22  
23  
24  
25  
26  
27  
28  
29  
30  
31  
32  
33  
34  
35  
36  
37  
38  
39  
40  
41  
42  
43  
44  
45  
46  
47**Introduction**

|                          |    |                                                                                                                                                                                                           |              |
|--------------------------|----|-----------------------------------------------------------------------------------------------------------------------------------------------------------------------------------------------------------|--------------|
| Background and rationale | 6a | Description of research question and justification for undertaking the trial, including summary of relevant studies (published and unpublished) examining benefits and harms for each intervention        | _____10_____ |
|                          | 6b | Explanation for choice of comparators                                                                                                                                                                     | _____11-14__ |
| Objectives               | 7  | Specific objectives or hypotheses                                                                                                                                                                         | _____16__    |
| Trial design             | 8  | Description of trial design including type of trial (eg, parallel group, crossover, factorial, single group), allocation ratio, and framework (eg, superiority, equivalence, noninferiority, exploratory) | _____13__    |

**Methods: Participants, interventions, and outcomes**

|                      |     |                                                                                                                                                                                                                                                                                                                                                                                |                 |
|----------------------|-----|--------------------------------------------------------------------------------------------------------------------------------------------------------------------------------------------------------------------------------------------------------------------------------------------------------------------------------------------------------------------------------|-----------------|
| Study setting        | 9   | Description of study settings (eg, community clinic, academic hospital) and list of countries where data will be collected. Reference to where list of study sites can be obtained                                                                                                                                                                                             | ___19, 32, 38__ |
| Eligibility criteria | 10  | Inclusion and exclusion criteria for participants. If applicable, eligibility criteria for study centres and individuals who will perform the interventions (eg, surgeons, psychotherapists)                                                                                                                                                                                   | _____18__       |
| Interventions        | 11a | Interventions for each group with sufficient detail to allow replication, including how and when they will be administered                                                                                                                                                                                                                                                     | ___18-24_____   |
|                      | 11b | Criteria for discontinuing or modifying allocated interventions for a given trial participant (eg, drug dose change in response to harms, participant request, or improving/worsening disease)                                                                                                                                                                                 | _____23, 26__   |
|                      | 11c | Strategies to improve adherence to intervention protocols, and any procedures for monitoring adherence (eg, drug tablet return, laboratory tests)                                                                                                                                                                                                                              | _____24__       |
|                      | 11d | Relevant concomitant care and interventions that are permitted or prohibited during the trial                                                                                                                                                                                                                                                                                  | _____24__       |
| Outcomes             | 12  | Primary, secondary, and other outcomes, including the specific measurement variable (eg, systolic blood pressure), analysis metric (eg, change from baseline, final value, time to event), method of aggregation (eg, median, proportion), and time point for each outcome. Explanation of the clinical relevance of chosen efficacy and harm outcomes is strongly recommended | _____16-17__    |
| Participant timeline | 13  | Time schedule of enrolment, interventions (including any run-ins and washouts), assessments, and visits for participants. A schematic diagram is highly recommended (see Figure)                                                                                                                                                                                               | _____37, 39__   |

|   |             |    |                                                                                                                                                                                       |              |
|---|-------------|----|---------------------------------------------------------------------------------------------------------------------------------------------------------------------------------------|--------------|
| 1 |             |    |                                                                                                                                                                                       |              |
| 2 |             |    |                                                                                                                                                                                       |              |
| 3 | Sample size | 14 | Estimated number of participants needed to achieve study objectives and how it was determined, including clinical and statistical assumptions supporting any sample size calculations | _____30_____ |
| 4 |             |    |                                                                                                                                                                                       |              |
| 5 | Recruitment | 15 | Strategies for achieving adequate participant enrolment to reach target sample size                                                                                                   | _____30_____ |
| 6 |             |    |                                                                                                                                                                                       |              |
| 7 |             |    |                                                                                                                                                                                       |              |

### 8 **Methods: Assignment of interventions (for controlled trials)**

#### 9 Allocation:

|    |                                  |     |                                                                                                                                                                                                                                                                                                                                                          |              |
|----|----------------------------------|-----|----------------------------------------------------------------------------------------------------------------------------------------------------------------------------------------------------------------------------------------------------------------------------------------------------------------------------------------------------------|--------------|
| 10 |                                  |     |                                                                                                                                                                                                                                                                                                                                                          |              |
| 11 |                                  |     |                                                                                                                                                                                                                                                                                                                                                          |              |
| 12 | Sequence generation              | 16a | Method of generating the allocation sequence (eg, computer-generated random numbers), and list of any factors for stratification. To reduce predictability of a random sequence, details of any planned restriction (eg, blocking) should be provided in a separate document that is unavailable to those who enrol participants or assign interventions | _____20_____ |
| 13 |                                  |     |                                                                                                                                                                                                                                                                                                                                                          |              |
| 14 |                                  |     |                                                                                                                                                                                                                                                                                                                                                          |              |
| 15 |                                  |     |                                                                                                                                                                                                                                                                                                                                                          |              |
| 16 |                                  |     |                                                                                                                                                                                                                                                                                                                                                          |              |
| 17 | Allocation concealment mechanism | 16b | Mechanism of implementing the allocation sequence (eg, central telephone; sequentially numbered, opaque, sealed envelopes), describing any steps to conceal the sequence until interventions are assigned                                                                                                                                                | _____20_____ |
| 18 |                                  |     |                                                                                                                                                                                                                                                                                                                                                          |              |
| 19 |                                  |     |                                                                                                                                                                                                                                                                                                                                                          |              |
| 20 |                                  |     |                                                                                                                                                                                                                                                                                                                                                          |              |
| 21 | Implementation                   | 16c | Who will generate the allocation sequence, who will enrol participants, and who will assign participants to interventions                                                                                                                                                                                                                                | _____20_____ |
| 22 |                                  |     |                                                                                                                                                                                                                                                                                                                                                          |              |
| 23 |                                  |     |                                                                                                                                                                                                                                                                                                                                                          |              |
| 24 | Blinding (masking)               | 17a | Who will be blinded after assignment to interventions (eg, trial participants, care providers, outcome assessors, data analysts), and how                                                                                                                                                                                                                | _____20_____ |
| 25 |                                  |     |                                                                                                                                                                                                                                                                                                                                                          |              |
| 26 |                                  |     |                                                                                                                                                                                                                                                                                                                                                          |              |
| 27 |                                  | 17b | If blinded, circumstances under which unblinding is permissible, and procedure for revealing a participant's allocated intervention during the trial                                                                                                                                                                                                     | _____20_____ |
| 28 |                                  |     |                                                                                                                                                                                                                                                                                                                                                          |              |
| 29 |                                  |     |                                                                                                                                                                                                                                                                                                                                                          |              |
| 30 |                                  |     |                                                                                                                                                                                                                                                                                                                                                          |              |

### 31 **Methods: Data collection, management, and analysis**

|    |                         |     |                                                                                                                                                                                                                                                                                                                                                                                                              |                   |
|----|-------------------------|-----|--------------------------------------------------------------------------------------------------------------------------------------------------------------------------------------------------------------------------------------------------------------------------------------------------------------------------------------------------------------------------------------------------------------|-------------------|
| 32 |                         |     |                                                                                                                                                                                                                                                                                                                                                                                                              |                   |
| 33 | Data collection methods | 18a | Plans for assessment and collection of outcome, baseline, and other trial data, including any related processes to promote data quality (eg, duplicate measurements, training of assessors) and a description of study instruments (eg, questionnaires, laboratory tests) along with their reliability and validity, if known. Reference to where data collection forms can be found, if not in the protocol | _____20 - 23_____ |
| 34 |                         |     |                                                                                                                                                                                                                                                                                                                                                                                                              |                   |
| 35 |                         |     |                                                                                                                                                                                                                                                                                                                                                                                                              |                   |
| 36 |                         |     |                                                                                                                                                                                                                                                                                                                                                                                                              |                   |
| 37 |                         |     |                                                                                                                                                                                                                                                                                                                                                                                                              |                   |
| 38 |                         | 18b | Plans to promote participant retention and complete follow-up, including list of any outcome data to be collected for participants who discontinue or deviate from intervention protocols                                                                                                                                                                                                                    | _____23, 29_____  |
| 39 |                         |     |                                                                                                                                                                                                                                                                                                                                                                                                              |                   |
| 40 |                         |     |                                                                                                                                                                                                                                                                                                                                                                                                              |                   |
| 41 |                         |     |                                                                                                                                                                                                                                                                                                                                                                                                              |                   |
| 42 |                         |     |                                                                                                                                                                                                                                                                                                                                                                                                              |                   |
| 43 |                         |     |                                                                                                                                                                                                                                                                                                                                                                                                              |                   |
| 44 |                         |     |                                                                                                                                                                                                                                                                                                                                                                                                              |                   |
| 45 |                         |     |                                                                                                                                                                                                                                                                                                                                                                                                              |                   |
| 46 |                         |     |                                                                                                                                                                                                                                                                                                                                                                                                              |                   |
| 47 |                         |     |                                                                                                                                                                                                                                                                                                                                                                                                              |                   |

1  
2  
3  
4  
5  
6  
7  
8  
9  
10  
11  
12  
13  
14  
15  
16  
17  
18  
19  
20  
21  
22  
23  
24  
25  
26  
27  
28  
29  
30  
31  
32  
33  
34  
35  
36  
37  
38  
39  
40  
41  
42  
43  
44  
45  
46  
47

Data management 19 Plans for data entry, coding, security, and storage, including any related processes to promote data quality (eg, double data entry; range checks for data values). Reference to where details of data management procedures can be found, if not in the protocol 32-33

Statistical methods 20a Statistical methods for analysing primary and secondary outcomes. Reference to where other details of the statistical analysis plan can be found, if not in the protocol 27-32

20b Methods for any additional analyses (eg, subgroup and adjusted analyses) 27-32

20c Definition of analysis population relating to protocol non-adherence (eg, as randomised analysis), and any statistical methods to handle missing data (eg, multiple imputation) 30

**Methods: Monitoring**

Data monitoring 21a Composition of data monitoring committee (DMC); summary of its role and reporting structure; statement of whether it is independent from the sponsor and competing interests; and reference to where further details about its charter can be found, if not in the protocol. Alternatively, an explanation of why a DMC is not needed 27, 33

21b Description of any interim analyses and stopping guidelines, including who will have access to these interim results and make the final decision to terminate the trial 28, 33

Harms 22 Plans for collecting, assessing, reporting, and managing solicited and spontaneously reported adverse events and other unintended effects of trial interventions or trial conduct 25-27

Auditing 23 Frequency and procedures for auditing trial conduct, if any, and whether the process will be independent from investigators and the sponsor 33

**Ethics and dissemination**

Research ethics approval 24 Plans for seeking research ethics committee/institutional review board (REC/IRB) approval 34

Protocol amendments 25 Plans for communicating important protocol modifications (eg, changes to eligibility criteria, outcomes, analyses) to relevant parties (eg, investigators, REC/IRBs, trial participants, trial registries, journals, regulators) 34

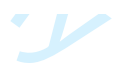

|    |                               |     |                                                                                                                                                                                                                                                                                     |                    |
|----|-------------------------------|-----|-------------------------------------------------------------------------------------------------------------------------------------------------------------------------------------------------------------------------------------------------------------------------------------|--------------------|
| 1  |                               |     |                                                                                                                                                                                                                                                                                     |                    |
| 2  |                               |     |                                                                                                                                                                                                                                                                                     |                    |
| 3  | Consent or assent             | 26a | Who will obtain informed consent or assent from potential trial participants or authorised surrogates, and how (see Item 32)                                                                                                                                                        | _____19_____       |
| 4  |                               |     |                                                                                                                                                                                                                                                                                     |                    |
| 5  |                               |     |                                                                                                                                                                                                                                                                                     |                    |
| 6  |                               | 26b | Additional consent provisions for collection and use of participant data and biological specimens in ancillary studies, if applicable                                                                                                                                               | _____19_____       |
| 7  |                               |     |                                                                                                                                                                                                                                                                                     |                    |
| 8  | Confidentiality               | 27  | How personal information about potential and enrolled participants will be collected, shared, and maintained in order to protect confidentiality before, during, and after the trial                                                                                                | _____34_____       |
| 9  |                               |     |                                                                                                                                                                                                                                                                                     |                    |
| 10 |                               |     |                                                                                                                                                                                                                                                                                     |                    |
| 11 | Declaration of interests      | 28  | Financial and other competing interests for principal investigators for the overall trial and each study site                                                                                                                                                                       | _____3_____        |
| 12 |                               |     |                                                                                                                                                                                                                                                                                     |                    |
| 13 |                               |     |                                                                                                                                                                                                                                                                                     |                    |
| 14 | Access to data                | 29  | Statement of who will have access to the final trial dataset, and disclosure of contractual agreements that limit such access for investigators                                                                                                                                     | _____32_____       |
| 15 |                               |     |                                                                                                                                                                                                                                                                                     |                    |
| 16 |                               |     |                                                                                                                                                                                                                                                                                     |                    |
| 17 | Ancillary and post-trial care | 30  | Provisions, if any, for ancillary and post-trial care, and for compensation to those who suffer harm from trial participation                                                                                                                                                       | _____35_____       |
| 18 |                               |     |                                                                                                                                                                                                                                                                                     |                    |
| 19 |                               |     |                                                                                                                                                                                                                                                                                     |                    |
| 20 | Dissemination policy          | 31a | Plans for investigators and sponsor to communicate trial results to participants, healthcare professionals, the public, and other relevant groups (eg, via publication, reporting in results databases, or other data sharing arrangements), including any publication restrictions | _____35_____       |
| 21 |                               |     |                                                                                                                                                                                                                                                                                     |                    |
| 22 |                               |     |                                                                                                                                                                                                                                                                                     |                    |
| 23 |                               |     |                                                                                                                                                                                                                                                                                     |                    |
| 24 |                               |     |                                                                                                                                                                                                                                                                                     |                    |
| 25 |                               | 31b | Authorship eligibility guidelines and any intended use of professional writers                                                                                                                                                                                                      | _____35_____       |
| 26 |                               |     |                                                                                                                                                                                                                                                                                     |                    |
| 27 |                               | 31c | Plans, if any, for granting public access to the full protocol, participant-level dataset, and statistical code                                                                                                                                                                     | _____n/a_____      |
| 28 |                               |     |                                                                                                                                                                                                                                                                                     |                    |
| 29 | <b>Appendices</b>             |     |                                                                                                                                                                                                                                                                                     |                    |
| 30 |                               |     |                                                                                                                                                                                                                                                                                     |                    |
| 31 | Informed consent materials    | 32  | Model consent form and other related documentation given to participants and authorised surrogates                                                                                                                                                                                  | _____separate_____ |
| 32 |                               |     |                                                                                                                                                                                                                                                                                     |                    |
| 33 |                               |     |                                                                                                                                                                                                                                                                                     |                    |
| 34 | Biological specimens          | 33  | Plans for collection, laboratory evaluation, and storage of biological specimens for genetic or molecular analysis in the current trial and for future use in ancillary studies, if applicable                                                                                      | _____41_____       |
| 35 |                               |     |                                                                                                                                                                                                                                                                                     |                    |
| 36 |                               |     |                                                                                                                                                                                                                                                                                     |                    |

37 \*It is strongly recommended that this checklist be read in conjunction with the SPIRIT 2013 Explanation & Elaboration for important clarification on the items.  
 38 Amendments to the protocol should be tracked and dated. The SPIRIT checklist is copyrighted by the SPIRIT Group under the Creative Commons  
 39 "[Attribution-NonCommercial-NoDerivs 3.0 Unported](https://creativecommons.org/licenses/by-nc-nd/3.0/)" license.  
 40

# BMJ Open

## Antivirals for influenza-Like Illness? A randomized Controlled trial of Clinical and Cost effectiveness in primary Care (ALIC4E): The ALIC4E Protocol

|                               |                                                                                                                                                                                                                                                                                                                                                                                                                                                                                                                                                                                                                                                                                                                                                                                                                                                                                                                                                                                                                                                                                                                                                                                                                                                                                                                                                                                                                                                                                                                                                                                                                                                                                                                                                                                                                                                                                                                                                                                                                                                                                                                                                                                                                                                                                                                                               |
|-------------------------------|-----------------------------------------------------------------------------------------------------------------------------------------------------------------------------------------------------------------------------------------------------------------------------------------------------------------------------------------------------------------------------------------------------------------------------------------------------------------------------------------------------------------------------------------------------------------------------------------------------------------------------------------------------------------------------------------------------------------------------------------------------------------------------------------------------------------------------------------------------------------------------------------------------------------------------------------------------------------------------------------------------------------------------------------------------------------------------------------------------------------------------------------------------------------------------------------------------------------------------------------------------------------------------------------------------------------------------------------------------------------------------------------------------------------------------------------------------------------------------------------------------------------------------------------------------------------------------------------------------------------------------------------------------------------------------------------------------------------------------------------------------------------------------------------------------------------------------------------------------------------------------------------------------------------------------------------------------------------------------------------------------------------------------------------------------------------------------------------------------------------------------------------------------------------------------------------------------------------------------------------------------------------------------------------------------------------------------------------------|
| Journal:                      | <i>BMJ Open</i>                                                                                                                                                                                                                                                                                                                                                                                                                                                                                                                                                                                                                                                                                                                                                                                                                                                                                                                                                                                                                                                                                                                                                                                                                                                                                                                                                                                                                                                                                                                                                                                                                                                                                                                                                                                                                                                                                                                                                                                                                                                                                                                                                                                                                                                                                                                               |
| Manuscript ID                 | bmjopen-2017-021032.R2                                                                                                                                                                                                                                                                                                                                                                                                                                                                                                                                                                                                                                                                                                                                                                                                                                                                                                                                                                                                                                                                                                                                                                                                                                                                                                                                                                                                                                                                                                                                                                                                                                                                                                                                                                                                                                                                                                                                                                                                                                                                                                                                                                                                                                                                                                                        |
| Article Type:                 | Protocol                                                                                                                                                                                                                                                                                                                                                                                                                                                                                                                                                                                                                                                                                                                                                                                                                                                                                                                                                                                                                                                                                                                                                                                                                                                                                                                                                                                                                                                                                                                                                                                                                                                                                                                                                                                                                                                                                                                                                                                                                                                                                                                                                                                                                                                                                                                                      |
| Date Submitted by the Author: | 01-May-2018                                                                                                                                                                                                                                                                                                                                                                                                                                                                                                                                                                                                                                                                                                                                                                                                                                                                                                                                                                                                                                                                                                                                                                                                                                                                                                                                                                                                                                                                                                                                                                                                                                                                                                                                                                                                                                                                                                                                                                                                                                                                                                                                                                                                                                                                                                                                   |
| Complete List of Authors:     | <p>Bongard, Emily; University of Oxford, Nuffield Department of Primary Care Health Sciences<br/> van der Velden, AW; University Medical Center Utrecht<br/> Cook, Johanna; University of Oxford, Nuffield Department of Primary Care Health Sciences<br/> Saville, Ben; Berry Consultants; Vanderbilt University School of Medicine, Department of Biostatistics<br/> Beutels, Philippe; University of Antwerp, Centre for Health Economics Research and Modelling Infectious Diseases (CHERMID), Vaccine &amp; Infectious Disease Institute (WHO collaborating centre)<br/> Munck Aabenhus, Rune; University of Copenhagen, Institute for Public Health<br/> Brugman, Curt; University Medical Center Utrecht<br/> Chlabicz, Slawomir; Medical University of Bialystok, Department of Family Medicine and Community Nursing<br/> Coenen, Samuel; University of Antwerp, Centre for General Practice, Department of Primary and Interdisciplinary Care (ELIZA); University of Antwerp, Laboratory of Medical Microbiology, Vaccine and Infectious Disease Institute (VAXINFECTIO)<br/> Colliers, Annelies; University Of Antwerp, Centre for General Practice, Department of Primary and Interdisciplinary Care (ELIZA)<br/> Davies, Melanie; Ely Bridge Surgery<br/> De Paor, Muireann; Royal College of Surgeons in Ireland School of Medicine, Department of General Practice<br/> De Sutter, An; Ghent University, Department of Family Medicine and Primary Health Care<br/> Francis, Nick A.; Cardiff University School of Medicine, Department of Population Medicine<br/> Glinz, Dominik; University of Basel; University Hospital Basel, Basel Institute for Clinical Epidemiology and Biostatistics<br/> Godycki-Cwirko, Maciek; Medical University of Lodz, Department of Family and Community Medicine<br/> Goossens, Herman; University of Antwerp, Laboratory of Medical Microbiology, Vaccine &amp; Infectious Disease Institute (VAXINFECTIO)<br/> Holmes, Jane; University of Oxford, Centre for Statistics in Medicine, Nuffield Department of Orthopaedics, Rheumatology and Musculoskeletal Sciences<br/> Ieven, Margareta; University of Antwerp, Laboratory of Medical Microbiology, Vaccine &amp; Infectious Diseases Institute (VAXINFECTIO)<br/> de Jong, Menno; Academic Medical Center, Department of Medical</p> |

|                                 |                                                                                                                                                                                                                                                                                                                                                                                                                                                                                                                                                                                                                                                                                                                                                                                                                                                                                                                                                                                                                                                                                                                                                                                                                                                                                                                                                                                                                                                                           |
|---------------------------------|---------------------------------------------------------------------------------------------------------------------------------------------------------------------------------------------------------------------------------------------------------------------------------------------------------------------------------------------------------------------------------------------------------------------------------------------------------------------------------------------------------------------------------------------------------------------------------------------------------------------------------------------------------------------------------------------------------------------------------------------------------------------------------------------------------------------------------------------------------------------------------------------------------------------------------------------------------------------------------------------------------------------------------------------------------------------------------------------------------------------------------------------------------------------------------------------------------------------------------------------------------------------------------------------------------------------------------------------------------------------------------------------------------------------------------------------------------------------------|
|                                 | <p>Microbiology<br/> Lindbaek, Morten; University of Oslo, Department of General Practice, Institute of Health and Society<br/> Little, Paul; University of Southampton, Primary Care and Population Science<br/> Martinon Torres, Frederico; Hospital Clinico Universitario de Santiago de Compostela, SERGAS<br/> Moragas, Ana; Universitat Rovira i Virgili, Primary Healthcare Centre Jaume I<br/> Pauer, József; Drug Research Centre LLC<br/> Pfeiferová, Markéta; Charles University, Institute of General Practice, First Faculty of Medicine<br/> Radzeviciene-Jurgute, Ruta; JSC Mano Seimos Gydytojas<br/> Sundvall, Pär-Daniel; Research and Development Center Södra Älvsborg, Närhälsan, Research and Development Primary Health Care, Region Västra Götaland; Sahlgrenska Academy at the University of Gothenburg, Department of Public Health and Community Medicine<br/> Torres, Antoni; Universitat de Barcelona and IDIBAPS, Department of Pulmonology, Hospital Clínic de Barcelona<br/> Touboul, Pia; University Hospital of Nice, Department of Public Health; University of Côte d'Azur, Department of Teaching and Research in General Practice<br/> Varthalis, Dionyssios; University of Crete, Clinic of Social and Family Medicine<br/> Verheij, Theo; University Medical Center Utrecht, Julius Center for Health Sciences and Primary Care<br/> Butler, C; University of Oxford, The Nuffield Department of Primary Care Health Sciences</p> |
| <b>Primary Subject Heading</b>: | General practice / Family practice                                                                                                                                                                                                                                                                                                                                                                                                                                                                                                                                                                                                                                                                                                                                                                                                                                                                                                                                                                                                                                                                                                                                                                                                                                                                                                                                                                                                                                        |
| Secondary Subject Heading:      | Health economics, Evidence based practice, Public health, Research methods, Infectious diseases                                                                                                                                                                                                                                                                                                                                                                                                                                                                                                                                                                                                                                                                                                                                                                                                                                                                                                                                                                                                                                                                                                                                                                                                                                                                                                                                                                           |
| Keywords:                       | Influenza, Oseltamivir, Primary Health Care, Cost-Benefit Analysis, Adaptive Clinical Trial                                                                                                                                                                                                                                                                                                                                                                                                                                                                                                                                                                                                                                                                                                                                                                                                                                                                                                                                                                                                                                                                                                                                                                                                                                                                                                                                                                               |
|                                 |                                                                                                                                                                                                                                                                                                                                                                                                                                                                                                                                                                                                                                                                                                                                                                                                                                                                                                                                                                                                                                                                                                                                                                                                                                                                                                                                                                                                                                                                           |

SCHOLARONE™  
Manuscripts

only

1  
2  
3 **Antivirals for influenza-Like Illness? A randomized Controlled trial of Clinical and**  
4 **Cost effectiveness in primary Care (ALIC<sup>4</sup>E): The ALIC<sup>4</sup>E Protocol**  
5  
6

7 Emily Bongard, Alike van der Velden, Johanna Cook, Ben Saville, Philippe Beutels, Rune  
8 Munck Aabenhus, Curt Brugman, Slawomir Chlabicz, Samuel Coenen, Annelies Colliers,  
9 Melanie Davies, Muireann De Paor, An De Sutter, Nick Francis, Dominik Glinz, Maciek  
10 Godycki-ćwirko, Herman Goossens, Jane Holmes, Margareta Ieven, Menno de Jong, Morten  
11 Lindbæk, Paul Little, Federico Martínón-Torres, Ana Moragas, József Pauer, Markéta  
12 Pfeiferová, Ruta Radzeviciene-Jurgute, Pär-Daniel Sundvall, Antoni Torres, Pia Touboul,  
13 Dionyssios Varthalis, Theo Verheij, Christopher C. Butler.  
14  
15

16 Corresponding author: Emily Bongard, University of Oxford, Nuffield Department of  
17 Primary Care Health Sciences, Radcliffe Primary Care, Radcliffe Observatory Quarter,  
18 Woodstock Road, Oxford, Oxfordshire, UK OX2 6GG. Email: [emily.bongard@phc.ox.ac.uk](mailto:emily.bongard@phc.ox.ac.uk).  
19 Tel: +44 (0)1865 289296. Fax: +44 (0)1865 289412.  
20

21 Alike van der Velden<sup>1</sup>, University Medical Center Utrecht, Utrecht, Netherlands.  
22

23 Johanna Cook, The Nuffield Department of Primary Care Health Sciences, University of  
24 Oxford, Oxford, UK.  
25

26 Ben Saville, Berry Consultants, Austin, Texas, USA; Department of Biostatistics, Vanderbilt  
27 University School of Medicine, Nashville, Tennessee, USA.  
28

29 Philippe Beutels, Centre for Health Economics Research and Modelling Infectious Diseases  
30 (CHERMID), Vaccine and Infectious Disease Institute (VAXINFECTIO), University of  
31 Antwerp, Antwerp, Belgium.  
32

33 Rune Munck Aabenhus, Institute for Public Health, University of Copenhagen, Copenhagen,  
34 Denmark.  
35

36 Curt Brugman, University Medical Center Utrecht, Utrecht, Netherlands.  
37

38 Slawomir Chlabicz, Department of Family Medicine and Community Nursing, Medical  
39 University of Bialystok, Bialystok, Poland.  
40

41 Samuel Coenen, Centre for General Practice, Department of Primary and Interdisciplinary  
42 Care (ELIZA), University of Antwerp, Antwerp, Belgium; Laboratory of Medical  
43 Microbiology, Vaccine & Infectious Disease Institute (VAXINFECTIO), University of  
44 Antwerp, Antwerp, Belgium.  
45

46 Annelies Colliers, Centre for General Practice, Department of Primary and Interdisciplinary  
47 Care (ELIZA), University of Antwerp, Antwerp, Belgium.  
48

49 Melanie Davies, Ely Bridge Surgery, Ely, Cardiff, UK.  
50

51 Muireann De Paor, Royal College of Surgeons in Ireland, School of Medicine, Department of  
52 General Practice, Dublin, Ireland.  
53  
54  
55

56 <sup>1</sup> Author 1 and Author 2 contributed equally to this paper.  
57  
58  
59  
60

1  
2  
3 An De Sutter, Department of Family Medicine and Primary Health Care, Ghent University,  
4 Ghent, Belgium.

5  
6 Nick A. Francis, Department of Population Medicine, Cardiff University School of Medicine,  
7 Cardiff, UK.

8  
9 Dominik Glinz, University of Basel, Basel, Switzerland; Basel Institute for Clinical  
10 Epidemiology and Biostatistics, University Hospital Basel, Basel, Switzerland.

11  
12 Maciek Godycki-Cwirko, Department of Family and Community Medicine, Medical  
13 University of Lodz, Lodz, Poland.

14  
15 Herman Goossens, Laboratory of Medical Microbiology, Vaccine & Infectious Disease  
16 Institute (VAXINFECTIO), University of Antwerp, Antwerp, Belgium.

17  
18 Jane Holmes, Centre for Statistics in Medicine, Nuffield Department of Orthopaedics,  
19 Rheumatology and Musculoskeletal Sciences, University of Oxford, Oxford, UK.

20  
21 Margareta Ieven, Laboratory of Medical Microbiology, Vaccine & Infectious Diseases  
22 Institute (VAXINFECTIO), University of Antwerp, Antwerp, Belgium.

23  
24 Menno de Jong, Department of Medical Microbiology, Academic Medical Center,  
25 Amsterdam, Netherlands.

26  
27 Morten Lindbæk, Department of General Practice, Institute of Health and Society, University  
28 of Oslo, Oslo, Norway.

29  
30 Paul Little, Primary Care and Population Science, University of Southampton, Southampton,  
31 UK.

32  
33 Federico Martinon-Torres, Hospital Clínico Universitario de Santiago de Compostela,  
34 SERGAS, Santiago de Compostela, Spain.

35  
36 Ana Moragas, Universitat Rovira i Virgili, Primary Healthcare Centre Jaume I, Tarragona,  
37 Catalonia, Spain.

38  
39 József Pauer, Drug Research Centre LLC, Balatonfüred, Hungary.

40  
41 Markéta Pfeiferová, Institute of General Practice, First Faculty of Medicine, Charles  
42 University, Prague, Czech Republic.

43  
44 Ruta Radzeviciene-Jurgute, JSC Mano Seimos Gydytojas, Klaipėda, Lithuania.

45  
46 Pär-Daniel Sundvall, Närhälsan, Research and Development Primary Health Care, Region  
47 Västra Götaland, Research and Development Center Södra Älvsborg Sweden, Borås,  
48 Sweden; Department of Public Health and Community Medicine/Primary Health Care,  
49 Sahlgrenska Academy at the University of Gothenburg, Gothenburg, Sweden.

50  
51 Antoni Torres, Department of Pulmonology, Hospital Clínic de Barcelona, Universitat de  
52 Barcelona and IDIBAPS, CIBERES, Barcelona, Spain.

53  
54 Pia Touboul Lundgren, Department of Public Health, University Hospital of Nice, Nice,  
55 France; Department of Teaching and Research in General Practice, University of Côte  
56 d'Azur, Nice, France.



1  
2  
3 Dionyssios Varthalis, Clinic of Social and Family Medicine, University of Crete, Heraklion,  
4 Greece.

5  
6 Theo Verheij, Julius Center for Health Sciences and Primary Care, University Medical  
7 Center, Utrecht, Netherlands

8  
9 Christopher C. Butler, The Nuffield Department of Primary Care Health Sciences, University  
10 of Oxford, Oxford, UK.

11  
12  
13 Word Count 5612

## 14 15 Abstract

### 16 17 Introduction

18  
19 Effective management of seasonal and pandemic influenza is a high priority internationally.  
20 Guidelines in many countries recommend antiviral treatment for older people and individuals  
21 with co-morbidity at increased risk of complications. However, antivirals are not often  
22 prescribed in primary care in Europe, partly because its clinical and cost effectiveness has  
23 been insufficiently demonstrated by non-industry funded and pragmatic studies.  
24  
25  
26  
27  
28  
29

### 30 31 Methods and analysis

32  
33  
34 ALIC<sup>4</sup>E is a European multi-national, multi-centre, open-labelled, non-industry funded,  
35 pragmatic, adaptive-platform, randomised controlled trial (RCT). Initial trial arms will be  
36 best usual primary care, and best usual primary care plus treatment with oseltamivir for five  
37 days. We aim to recruit at least 2500 participants  $\geq 1$  year old presenting with influenza-like  
38 illness (ILI), with symptom duration  $\leq 72$  hours in primary care over three consecutive  
39 periods of confirmed high influenza incidence. Participant outcomes will be followed-up to  
40 28 days by diary and telephone. The primary objective is to determine whether adding  
41 antiviral treatment to best usual primary care is effective in reducing time to return to usual  
42 daily activity with fever, head- and muscle-ache reduced to minor severity or less. Secondary  
43 objectives include estimating cost-effectiveness, benefits in subgroups according to age (<12,  
44 12-64, >64 years), severity of symptoms at presentation (low, medium, high), comorbidity  
45 (yes/no), and duration of symptoms ( $\leq 48$  hours/ $> 48-72$  hours), complications (hospital  
46 admission and pneumonia); use of additional prescribed medication including antibiotics,  
47 and; use of over-the-counter medicines and self-management of ILI symptoms.  
48  
49  
50  
51  
52  
53  
54  
55  
56  
57  
58  
59  
60

## Ethics and dissemination

Research ethics committee (REC) approval was granted by the NRES Committee South Central (Oxford B) and Clinical Trial Authority (CTA) approval by The Medicines and Healthcare products Regulatory Agency. All participating countries gained national REC and CTA approval as required. Dissemination of results will be through peer reviewed scientific journals and conference presentations.

## Trial Registration

ISRCTN27908921

## Strengths and limitations of this study

- ALIC<sup>4</sup>E will be the first publicly funded, multi-country, pragmatic study determining whether antivirals should be routinely prescribed for influenza like illness (ILI) in primary care and if pre-specified characteristics (age, symptom duration, illness severity, and co-morbidities) influence outcomes.
- The platform design allows the study to remain relevant to evolving circumstances, with the ability to add treatments arms.
- Response adaptation allows the proportion of participants with key characteristics allocated to study arms to be altered during the course of the trial according to emerging outcome data, so that participants' information will be most useful, and increasing their chances of receiving the intervention that will be most effective for them.
- Because the possibility of taking a placebo influences participant expectation about their treatment, and determining effects of the interventions on patient behaviour in real-world care is critical to estimates of cost effectiveness, ALIC<sup>4</sup>E is designed as an open-labelled trial.
- The open design carries risk of bias in participants' self-reported outcomes; clear explanation of equipoise by recruiters may mitigate this.

## Keywords

Influenza, Oseltamivir, Primary Health Care, Cost-Benefit Analysis, Adaptive Clinical Trial

## Background

The influenza virus is highly contagious and represents a common cause of respiratory infection with local and systemic symptoms. Annual influenza epidemics account for considerable morbidity and mortality<sup>1-4</sup> and influenza outbreaks have the potential to become pandemics<sup>2</sup>. Effective control and management of seasonal and pandemic influenza is a high priority for national governments. Routine use of antiviral agents is rare in European primary care<sup>5</sup>. General practitioners (GPs) in Europe generally advise patients who consult with influenza-like illness (ILI) to take paracetamol or non-steroidal anti-inflammatory agents (NSAIDs), either as required or at regular intervals. They may also provide advice about other over-the-counter (OTC) medicines and self-management of ILI symptoms, e.g. maintaining fluids, bed rest and taking time off work or school. This broad approach is currently considered best usual care for the empirical management of ILI in Europe<sup>6-8</sup>.

Currently, the most suitable antiviral agent available for pragmatic evaluation in ALIC<sup>4</sup>E is oseltamivir (Tamiflu®), a neuraminidase inhibitor (NI). The US Food and Drug Administration (FDA) approved oseltamivir in 1999. Oseltamivir was classified by the WHO as an essential medicine until 2017<sup>9,10</sup>, and many countries have stockpiles of the drug to ensure it is readily available to treat seasonal and pandemic influenza<sup>5</sup>. Oseltamivir could therefore be used for the management of ILI on assumption that many cases of ILI may be caused by influenza, the probability of this being higher during confirmed periods of heightened influenza based on national reports of ILI consultations and laboratory confirmed influenza cases.

Oseltamivir phosphate is an oral pro-drug which undergoes hydrolysis by hepatic esterase to form active oseltamivir carboxylate. Oseltamivir carboxylate acts by selective inhibition of influenza A and B viral neuraminidase. This enzyme normally promotes release of the virus from infected cells by cleaving terminal sialic acid residues on the surface of host cells and influenza virus envelopes, and facilitates viral movement within the respiratory tract. By blocking the activity of the enzyme, oseltamivir prevents new viral particles from being released<sup>11,12</sup>. Oseltamivir might also modify the immune response to influenza infection by reducing levels of pro-inflammatory cytokines which might, in turn, modulate symptoms of influenza<sup>13</sup>.

1  
2  
3 Industry-sponsored trials (or studies), efficacy studies and clinical study reports of NIs, most  
4 often oseltamivir, have been the subject of many systematic reviews and meta-analyses,  
5 including individual patient meta-analyses<sup>14-16</sup>. In two recent meta-analyses that differed in  
6 their methods and the primary outcome measures used, but that included almost the same set  
7 of trials, Jefferson *et al.* found that oseltamivir improved the mean time to first alleviation of  
8 symptoms over the placebo by 16.8 hours<sup>13</sup> and Dobson *et al.* found oseltamivir improved the  
9 median time to alleviation of all symptoms over the placebo by 17.8 hours<sup>15</sup>. The reviewers  
10 also found that oseltamivir reduced the risk of self-reported, non-verified pneumonia but not  
11 for clinically diagnosed pneumonia<sup>13,15</sup>. Dobson *et al.* furthermore indicated that treatment  
12 with oseltamivir might reduce the risk of lower respiratory tract infection complications and  
13 hospitalization in patients testing positive for influenza<sup>15</sup>. However, increased nausea and  
14 vomiting were found to be associated with oseltamivir use<sup>13,15</sup>. Even with a possible  
15 reduction in symptom duration (compared to a placebo) the value of oseltamivir treatment of  
16 previously healthy individuals with non-severe seasonal influenza is questionable.  
17 Conversely, circumstances of some individuals, for example those urgently needing to return  
18 to work and parents and other carers, may mean that a reduction in function-limiting  
19 symptoms of a day may be considered very worthwhile. The UK Academy of Medical  
20 Sciences recently reviewed current evidence, and they advised that additional pragmatic trials  
21 in primary care and cost-effectiveness analyses that take virulence and severity of the  
22 circulating strain into account are required to further inform such judgements<sup>17</sup>.

23  
24  
25  
26  
27  
28  
29  
30  
31  
32  
33  
34  
35  
36 Since 1999, oseltamivir has generated sales in excess of \$18bn (£11bn; €13bn). The United  
37 States stockpiled 65 million treatments at a cost of \$1.3bn. The United Kingdom spent £424m  
38 on a stockpile of 40 million doses. By 2009, 96 countries possessed enough oseltamivir for  
39 350 million people<sup>18</sup>. In 2017 the WHO downgraded oseltamivir in the list of essential  
40 medicines from a “core” drug to one that is “complimentary”—a category of drugs  
41 considered less cost-effective<sup>9,10</sup>. However, there has never been a large-scale, international,  
42 publicly funded, pragmatic RCT of its cost-effectiveness in primary care, and so the evidence  
43 base either to support or not support the routine use of this agent in primary care is  
44 inadequate and raises the question: does the effect found in previous efficacy studies translate  
45 into a meaningful benefit in every day primary care? Specifically, what are the overall costs  
46 and benefits of this possible shortened symptom duration from the perspective of the  
47 individual sufferer, the health services, and for society? Do patients considered to be at higher  
48 risk for complications of influenza (for example due to age, duration and severity of  
49  
50  
51  
52  
53  
54  
55  
56  
57  
58  
59  
60

1  
2  
3 symptoms, or relevant co-morbidity) benefit more from antiviral treatment in primary care?  
4 Answering these questions will reduce important clinical uncertainty for primary care  
5 clinicians about whether to prescribe antiviral agents for ILI, and whether or not to prioritise  
6 antiviral treatment for subgroups of primary care patients.  
7  
8

9  
10 The ALIC<sup>4</sup>E trial will be delivered as work package (WP) 4 of the Platform for European  
11 Preparedness Against (Re-) emerging Epidemics (PREPARE: [www.prepare-europe.eu/](http://www.prepare-europe.eu/))  
12 consortium grant. PREPARE is a European Commission funded network for the rapid and  
13 efficient delivery of harmonised, large-scale clinical research studies on infectious diseases  
14 (ID)<sup>19</sup>. ALIC<sup>4</sup>E will be a randomised controlled trial of investigational medicinal products  
15 (CTIMP) in primary care that will determine the clinical- and cost-effectiveness of adding  
16 antiviral agents to best usual primary care for patients with specific characteristics suffering  
17 from ILI, and thus enable clinicians to better individualise prescribing decisions.  
18  
19

20  
21  
22  
23  
24 The primary objective of ALIC<sup>4</sup>E is therefore to determine whether adding antiviral treatment  
25 to best usual primary care is effective in reducing time taken to return to usual daily activity  
26 in patients with ILI. Secondary objectives will be to determine whether antiviral treatment is  
27 cost-effective; benefits pre-specified subgroups of participants; decreases hospital  
28 admissions; decreases complications related to ILI, especially pneumonia; improves the  
29 health-related quality of life; decreases (repeat) attendance at the GP, or other health services;  
30 decreases time to first reduction, time to alleviation, and new/worsening of ILI symptoms;  
31 reduces the use of over the counter (OTC) and prescribed medication, including antibiotics,  
32 and; affects the self-management of ILI symptoms.  
33  
34  
35  
36  
37  
38  
39

## 40 Methods/Design

41  
42  
43 The protocol for ALIC<sup>4</sup>E, is reported according to the Standard Protocol Items  
44 Recommendations for Interventional Trials (SPIRIT) guidelines.  
45  
46

## 47 Ethics and dissemination

48  
49  
50 The trial was granted research ethics committee (REC) approval by the NRES Committee  
51 South Central (Oxford B) and Clinical Trial Authority (CTA) approval by The Medicines and  
52 Healthcare products Regulatory Agency, i.e. the competent authority in the UK. All  
53 participating countries gained national REC and CTA approval as required and when needed.  
54  
55  
56  
57  
58  
59  
60

1  
2  
3 All participants will provide written informed consent before participation. The study will be  
4 conducted (using Good Clinical practice guidelines) according to the principles of the  
5 Declaration of Helsinki and in accordance with other relevant national guidelines,  
6 regulations, and acts. An independent Data Monitoring Committee (DMC) will review  
7 efficacy and safety data by treatment allocation, and a Trial Steering Committee will provide  
8 oversight of the trial.  
9  
10  
11  
12

13  
14 A manuscript with the results of the primary outcome will be published in a peer-reviewed  
15 journal. Additional manuscripts will be report secondary outcomes, and be submitted for  
16 publication in peer-reviewed journals.  
17  
18

### 19 Patient and public involvement

20  
21  
22 The relevance and necessity of the research question, study design and development of  
23 patient facing documents including the Consent Forms, Participant Information Sheets,  
24 Symptom Diary, all follow up forms and promotional materials have been reviewed by  
25 members of the public. The patient and public involvement (PPI) group included a mixture of  
26 research experienced and inexperienced people, parents and elderly members of the public.  
27  
28  
29  
30

31  
32 As part of the Trial Steering Committee (TSC) a representative of the relevant patient group  
33 is involved in the continued review of the recruitment to and conduct of the study. A TSC  
34 meeting is held at least once per year before each recruiting season.  
35  
36  
37

38 The intervention arm in ALIC<sup>4</sup>E is the use of an antiviral in addition to best usual primary  
39 care. The burden to participants was assessed by the TSC and considered minimal as the only  
40 antiviral currently being assessed in ALIC<sup>4</sup>E, oseltamivir, is a licensed medication with  
41 marketing authorisation globally. In the context of the ALIC<sup>4</sup>E Trial a standard dose of  
42 oseltamivir has been shown to be well tolerated. The study itself is only using the standard  
43 does of oseltamivir and is being used according to the marketing authorisation it has been  
44 granted.  
45  
46  
47  
48  
49

50 Trial participants will not be informed of the trial results directly. However, the results will  
51 be published on the PREPARE Consortium website (<http://www.prepare-europe.eu/>) and on  
52 the Nuffield Department of Primary Care website (<https://www.phc.ox.ac.uk/phctrials>), both  
53 can be accessed freely.  
54  
55  
56  
57  
58  
59  
60

## Networks and participants

ALIC<sup>4</sup>E is a European multi-national, multi-centre, open-labelled, pragmatic, adaptive-platform, randomised controlled trial (RCT). 21 primary care clinical research networks in 15 European countries will recruit participants (Figure 1), and each network will co-ordinate the recruiting sites within their network. A number of the primary care research networks had already established collaborations through the GRACE (Genomics to combat Resistance against Antibiotics in Community-acquired LRTI in Europe; [www.grace-lrti.org](http://www.grace-lrti.org)) Network of Excellence<sup>20,21</sup>. They were sustained through TRACE (Translational Research on Antimicrobial resistance and Community-acquired infections in Europe; [www.esf.org/trace](http://www.esf.org/trace)) and were complemented by PREPARE for ALIC<sup>4</sup>E with six additional primary care research networks.

Recruitment will be over three consecutive flu seasons, Q4 2015 to Q1/2 2018. Each season's start and end of recruitment will be based on reports of local influenza-like illness incidence rising above (or falling below) pre-specified thresholds, using information supplied by the European Centre of Disease Prevention and Control (ECDC)<sup>22</sup>, and local and regional sources for each network.

We aim to recruit a minimum of 2500 participants through recruiting sites (GP Practice, primary care Out of Hours (OOH) service or Paediatric Centres within primary care). Potential participants will be identified when they present to the recruiting sites with symptoms of ILI, or when they telephone for an appointment or advice about their symptoms. Participants must meet the inclusion criteria (including symptom onset of 72 hours or less) and have none of the exclusion criteria (Table 1). The definition of ILI used in ALIC<sup>4</sup>E was based on the European Centre for Disease Prevention and Control (ECDC) definition<sup>23</sup> with flexibility to maximise recruitment of children and the elderly<sup>24,25</sup>. If eligible and willing to participate, the participant will complete the rest of the initial trial procedures either within the same visit, or at a second appointment with a recruiter at the recruiting site, or at home.

Table 1. Eligibility criteria

| Inclusion | Exclusion |
|-----------|-----------|
|-----------|-----------|

- 
- Male or Female, aged at least one year
  - Presenting with ILI\* in primary care during a period of increased influenza activity.
- \* ILI=sudden onset of self-reported fever, with at least one respiratory symptom (cough, sore throat, running or congested nose) and one systemic symptom (headache, muscle ache, sweats or chills or tiredness), with symptom duration of 72 hours or less
- Is able and willing to comply with all trial requirements
  - Participant or legal guardian(s) of a child is willing and able to give informed consent
  - Agrees not to take antiviral agents apart from study antiviral agents according to patient randomisation
- Chronic renal failure e.g. known or estimated creatinine glomerular filtration rate <60 ml/min (known = recorded in participant's clinical records)
  - Condition or treatment associated with significant impaired immunity (e.g. long-term oral steroids, chemotherapy, or immune disorder) (known=recorded in participant's clinical records)
  - Those who in the opinion of the responsible clinician should be prescribed immediate antiviral treatment
  - Allergic to oseltamivir or any other trial medication
  - Scheduled elective surgery or other procedures requiring general anaesthesia during the subsequent two weeks
  - Participant with life expectancy estimate by a clinician to be less than 6 months
  - Patient with severe hepatic impairment
  - Responsible clinician considers urgent hospital admission is required
  - Any other significant disease or disorder which, in the opinion of the responsible clinician, may either put the participants at risk because of participation in the trial, or may influence the result of the trial, or may affect the participant's ability to participate in the trial
  - Involvement, including completion of any follow up procedures, in another clinical trial of an investigational medicinal product in the last 90 days
  - Previous ALIC<sup>4</sup>E trial participation
  - Patients unable to be randomised within 72 hours after onset of symptoms
  - Requirement for any live viral vaccine in the next 7 days
  - *Optional according to specific country legislation:*
    - Pregnant, lactating or breastfeeding women
- 

The local implementation of the trial has built-in flexibility and local network recruitment processes vary. For example, medical students may assist with recruitment tasks in certain practices, while others will incorporate triage systems or additional trial specific clinics and/or research support staff in their recruitment processes.



## Randomization and blinding

After obtaining informed, written consent, participants will be randomised at the point of care using a remote online electronic data capture (EDC) system (Research Online 2). Emergency randomisation procedures will be available should this web-based facility be temporarily unavailable. Randomisation will initially be a 1:1 ratio between the two arms, with stratification by subgroup according to ECDC definitions of those at higher risk of complications from influenza, namely their age (<12, 12-64, >64 years), severity of symptoms (low, medium, high), any relevant comorbidity<sup>i</sup> (yes/no), and duration of symptoms since onset ( $\leq 48$  hours/ $> 48-72$  hours). The proportions randomised to study arms may be altered during the course of the trial following a pre-specified Bayesian, response adaptive approach<sup>26</sup>.

ALIC<sup>4E</sup> is an open trial. The participant, the recruiting clinician and the study personnel will be aware of the participant's allocation. An open pragmatic trial was chosen because this design is better for determining effects in routine care when patients are much less tightly supervised. Estimates of effect from placebo-controlled efficacy trials may not translate into similar effect sizes when interventions are taken up into routine clinical care. Knowledge of what medication one is taking influences help-seeking behaviour, and decisions to re-consult may substantially affect cost-effectiveness. In addition, efficacy estimates have already been repeatedly determined in efficacy trials with tightly controlled inclusion criteria, in which children, the elderly and people with co-morbidities have been under represented<sup>27</sup>. Clinicians do not prescribe placebos in routine care, and so the credible comparator is current best practice<sup>28</sup>. Therefore, no un-blinding or code breaking is required in the event of a relevant emergency. However, the trial team will be blind to treatment allocation at the aggregate level. The recruiter will promote equipoise for the participant about the two arms which will be carefully covered in trial specific training, and each arm of the trial will be supported as in routine practice; previous open pragmatic trials have been able to minimise placebo effects using this approach<sup>29,30</sup>.

## Intervention

Participants randomised to best usual primary care plus oseltamivir arm will be given a dose of 75 mg oseltamivir twice a day for five days by the oral route (capsules) for those  $\geq 13$  years. For those who are  $\geq 1$  year but  $< 13$  years the doses will be twice daily for 5 days in

suspension, administered orally, according to weight: 10-15 kg = 30 mg; >15-23 kg = 45 mg; >23-40 kg = 60 mg; >40 kg = 75 mg. Children weighing >40 kg and who are able to swallow capsules may receive treatment with the adult dosage of 75 mg capsules twice daily for five days as an alternative to the same dose of oseltamivir suspension. Route of administration, dosage and treatment periods follow the manufacturers Summary of Product Characteristics (SPC)<sup>12</sup>. Weight will be measured in children  $\leq 12$  years of age during the recruitment visit for medication dosing. All other participants will be asked about their weight at the baseline assessment and measured in case of uncertainty. A daily Symptom Diary and subsequent day 14-28 telephone call will be used to monitor intervention compliance, and together with a telephone call after day 28, will also ascertain a minimal data set for some other outcomes.

## Endpoints

The primary outcome is patient reported time to having both returned to usual daily activity, and 'fever', 'headache' and 'muscle-ache' symptoms all rated as ' $\leq$ minor problem'. For non-verbal children, 'clinginess' will replace 'headache' and 'muscle ache', when both are unanswered.

Secondary outcomes will include (collected up to day 28):

- Cost-effectiveness measures through health care resource use and health-related quality of life
- Effectiveness in subgroups of participants (based on age bands, initial illness severity, relevant co-morbidity, duration of symptoms, and laboratory confirmed influenza A/B positivity)
- Hospital admissions (overnight stay)
- (Re-) attendance at GP Practice, hospital emergency care, primary care OOH services or Paediatric Centres
- Complications related to ILI and/or potential relevant complications such as pneumonia
- Time to first reduction, time to alleviation of, and new/worsening ILI symptoms
- Use of prescription medications, including antibiotics
- Use of over-the-counter medications
- Participant reported self-management and usual daily activities

## Procedures and assessments

Table 2 outlines the ALIC<sup>4</sup>E Schedule of Procedures according to the SPIRIT guidelines.

Table 2. ALIC<sup>4</sup>E Schedule of Procedures

|                                        | Screening | Baseline<br>Day 1 | Day 1-14 | Day 14 - 28 | Post day 28 |
|----------------------------------------|-----------|-------------------|----------|-------------|-------------|
| Eligibility assessment <sup>1</sup>    | ✓         |                   |          |             |             |
| Informed consent <sup>1+2</sup>        |           | ✓                 |          |             |             |
| Baseline CRF <sup>1</sup>              |           | ✓                 |          |             |             |
| Physical examination <sup>1</sup>      |           | ✓                 |          |             |             |
| Swab(s) <sup>1</sup>                   |           | ✓                 |          |             |             |
| Randomisation <sup>1</sup>             |           | ✓                 |          |             |             |
| Dispensing of trial drugs <sup>1</sup> |           | ✓                 |          |             |             |
| Symptom Diary <sup>2</sup>             |           |                   | ✓        |             |             |
| Day 2-4 Phone Call <sup>3</sup>        |           |                   | ✓        |             |             |
| Day 14 -28 Phone Call <sup>3</sup>     |           |                   |          | ✓           |             |
| After day 28 Phone Call <sup>3</sup>   |           |                   |          |             | ✓           |
| Clinical notes Review* <sup>3</sup>    |           |                   |          |             | ✓           |
| Adverse event assessments <sup>3</sup> |           |                   | ✓        |             | ✓           |
| SAE Follow-up <sup>3</sup>             |           |                   | ✓        |             | ✓           |

\*Country dependent

<sup>1</sup>Completed by recruiter

<sup>2</sup>Completed by participant, includes standardised written health-related quality of life assessment and documents resource use

<sup>3</sup>Completed by trial team (CI/PI/coordinator), Day 28 call includes standardised verbal health-related quality of life assessment

### Baseline Assessment (Day 1)

After obtaining written, informed consent, recruiters will complete a baseline Case Report Form (CRF). This will include the required information for randomisation: age; relevant comorbidities; duration of symptoms; clinician's rating of severity of ILI as mild, moderate or severe. In addition, the CRF will ascertain participant's/parent's severity grading for:

1  
2  
3 fever, running or congested nose, sore throat, headache, cough, shortness of breath, muscle  
4 ache and pains, sweats/chills, diarrhoea, nausea and/or vomiting, abdominal pain, low  
5 energy/tired, not sleeping well, dizziness, feeling generally unwell (grading = no, minor,  
6 moderate, major problem); information about any usual care advice given to the participant;  
7 and type of health care coverage (e.g. public, private or mixed). The symptom questions will  
8 be supplemented with child-specific questions so that the Canadian Acute Respiratory Illness  
9 Flu Scale will be completed for children  $\leq 12$  years of age<sup>31</sup>.

10  
11  
12  
13  
14  
15 Additionally, clinical examination findings will be recorded including: temperature and the  
16 way it was measured (oral, ear or axilla); use of antipyretics in the last 4 hours; pulse rate;  
17 weight ( $\leq 12$  years of age or in cases of uncertainty); height; smoking status; gender; and  
18 whether they have had flu vaccination within six months and pneumococcal vaccination  
19 within five years.

20  
21  
22  
23  
24 The recruiter will provide antiviral medication according to the participant's group allocation  
25 and standardised instructions on how to take the medication. The recruiter will also take an  
26 oropharyngeal and a nasal swab (COPAN®) from those  $< 16$  years of age and a  
27 nasopharyngeal swab (COPAN®) from those  $\geq 16$  years of age. All swabs will be placed in  
28 3mL universal transport media (UTM) and transported to a local laboratory for storage.  
29 Finally, they will instruct participants how to complete the Symptom Diary and give  
30 information about telephone follow-up assessments.

### 31 32 33 34 35 36 37 **Diary (Day 1 – 14) and Follow-up**

38  
39 There is no requirement for participants to attend a face-to-face follow-up visit as part of their  
40 study participation, as all subsequent measurements will be ascertained by self-completed  
41 diary-based questionnaires and through telephone calls from the local trial team.

42  
43  
44  
45 Participants (or their legal guardian or their carer) will be asked to complete a Symptom  
46 Diary from day 1 (baseline) through to day 14 after randomisation. The following data points  
47 will be collected once: expectations of treatment benefit; ethnicity; employment status;  
48 cohabitation; pregnancy and stage; and current long-term medication. The following data  
49 points are collected daily in the diary: severity of selected ILI symptom; quality of life (EQ  
50 Visual Analogue Scale (VAS)); return to usual daily activity; prescription medication use  
51 (including antibiotics); use of OTC medication or remedies; adherence to trial medication and  
52  
53  
54  
55  
56  
57  
58  
59  
60

1  
2  
3 potential side-effects (up to day 7). The following data points will be collected weekly:  
4 quality of life (using EQ 5D 5L index (respondents >12 years) or EQ 5D 3Y (respondents  
5 ≤12 years)); effect of the participants' symptoms on usual daily activities; health care  
6 resource use; out-of-pocket expenditure; and ILI state of people in the same household.  
7  
8  
9

10 Participants and legal guardians will be telephoned on day three (+/- one day) (with day one  
11 defined as the day they were recruited into the study) to offer support with Symptom Diary  
12 completion and to check for any urgent issues. They will also be telephoned on day 14 (up to  
13 day 28) and asked on what day they returned to their usual daily activity, if and when their  
14 fever, head- and muscle-ache symptoms reduced to minor severity or less to ensure the  
15 primary end point is collected for all participants, and to ascertain any Serious Adverse  
16 Events (SAEs) in the preceding two weeks. Participants will receive a final telephone call on  
17 or after day 28 to complete a verbal EQ-5D-5L/3Y and VAS, to answer remaining questions  
18 about symptom resolution if needed, and about their trial participation and consent process as  
19 part of a process evaluation (see below). The trial team will ask whether participants have had  
20 a recurrence of their symptoms during this time and whether they have been admitted into  
21 hospital as a result of their symptoms.  
22  
23  
24  
25  
26  
27  
28  
29  
30

31 Participants who have visited the hospital with complications possibly related to ILI and who  
32 have had a chest X-ray will have their primary care clinical records examined by the trial  
33 team for confirmation of relevant diagnoses of complications, including pneumonia.  
34  
35  
36

### 37 **Laboratory testing and point of care test (POCT)**

38  
39 Once the swabs have been received at local laboratories, samples will be frozen and stored at  
40 -70°C (-20°C is acceptable if there is no deep-freezer). After each flu season, samples will be  
41 transported to the Laboratory of Medical Microbiology, University of Antwerp, Belgium for  
42 analysis. Each participant's swab(s) will be analysed using a Multiplex RT-PCR for detection  
43 of pathogen genes by TaqMan® technology to identify whether or not the participant is  
44 infected with influenza A or B, with other respiratory viruses<sup>ii</sup>, or with bacteria<sup>iii</sup>.  
45  
46  
47  
48  
49

### 50 **Interviews and Qualitative assessment**

51  
52 As part of the day 28 telephone call to the participants or legal guardians or carers, questions  
53 will be asked about motivation for participating in the ALIC<sup>4</sup>E study, what influenced that  
54 decision, and questions related to research participation during a pandemic.  
55  
56  
57  
58  
59  
60

1  
2  
3 All participating clinicians will be asked to complete a brief questionnaire, and a sub-sample  
4 will be asked their perspectives on the trial process, their views of influenza management in  
5 primary care, and participation in pandemic research.  
6  
7

### 8 **Safety and discontinuation or withdrawal of participants from trial treatment**

9  
10  
11 Oseltamivir has a well-documented safety profile and is a commonly used medication in a  
12 primary care setting. As a result, no non-serious adverse events will be recorded in this study.  
13 All Serious Adverse Events (SAEs) occurring during the 28 days participants are enrolled on  
14 the trial will be recorded. It will be left to the Investigator's clinical judgment to decide  
15 whether or not a symptom or side effect is of sufficient severity to require the participant's  
16 removal from treatment. If the participant is withdrawn due to an adverse event (AE), the  
17 investigator will arrange for follow-up visits or telephone calls until the adverse event has  
18 resolved or stabilised or until the end of their trial participation, whichever is later. If the  
19 participant is withdrawn due to an AE, follow up data will continue to be collected and their  
20 information will be included for the purpose of the intention to treat analysis. Participants  
21 have the right to withdraw from the study at any time without any prejudice to current and  
22 future health care.  
23  
24  
25  
26  
27  
28  
29  
30

### 31 **Response Adaptive-Platform Trial Design**

32  
33  
34 An "adaptive platform trial" enables multiple interventions for the same indication to be  
35 tested simultaneously within a master protocol, and often includes the capacity to add, or  
36 drop, study arms while the study is in progress<sup>32,33</sup>. Platform trials provide an effective  
37 framework to study patient heterogeneity in outcomes, with the goal of determining the best  
38 treatment for various subgroups of patients. In addition, platform trial designs can incorporate  
39 response adaptive randomization in order to randomize more participants to the best  
40 performing interventions during the course of the trial. This can increase statistical power and  
41 efficiency of the trial, as well as lead to better patient outcomes over the course of the study<sup>34</sup>.  
42  
43  
44  
45  
46  
47

48 We chose an adaptive platform trial design because it provided flexibility to evaluate  
49 additional interventions in the trial, should interventions emerge that are suitable to pragmatic  
50 evaluation in primary care. Additionally, the design provides the ability to prospectively  
51 identify particular subgroups of interest that may receive benefit from antiviral agents, as  
52 opposed to estimating a single overall effect. This is done by incorporating a Bayesian  
53 modelling approach, combined with response adaptive randomization based on pre-specified  
54  
55  
56  
57  
58  
59  
60

1  
2  
3 participant characteristics. There will be multiple interim analyses during recruitment;  
4 planned after every 750 patients and/or between flu seasons.  
5

6  
7 In ALIC<sup>4E</sup>, participants will be initially randomised in a 1:1 ratio to the two arms, with  
8 stratification by subgroup and random blocks. Each arm will maintain at least a 10%  
9 probability of randomisation within each subgroup throughout the course of the trial. Arm  
10 superiority will be assessed by subgroup and may be declared superior in some subgroups,  
11 but not within others. If, at an interim analysis, an arm meets the superiority criterion for one  
12 of the treatments, randomization probabilities may be modified for those subgroups such that  
13 a minimum of 10% of participants are allocated to the inferior arm, with the remaining  
14 allocation to the superior arm (a maximum of 90%, if two arms). In this event, stratification  
15 and blocking will no longer occur within these subgroups. This will ensure the majority of  
16 participants receive the best-known therapy, yet the trial design will still allow the assessment  
17 of seasonal variation and population changes in the study population over time. In addition,  
18 we will still be able to collect data about costs and health related behaviours (including health  
19 care seeking) associated with a poorly performing arm.  
20  
21  
22  
23  
24  
25  
26  
27

28 New comparator arms may enter the trial as determined by the Trial Steering Committee.  
29 Eligible therapies will include newly approved treatments for ILI or therapies recommended  
30 by public health agencies during an influenza pandemic. If an arm is added to the trial, there  
31 is a pre-specified algorithm determining randomization ratios, and for activating response  
32 adaptive randomization within subgroups to the respective treatment arms. The operating  
33 characteristics of the trial will be updated via simulation; however, the general structure of  
34 the trial does not change. Response adaptive randomization may be activated in subgroups  
35 without satisfying superiority criterion only if the number of interventions is greater than two.  
36  
37  
38  
39  
40  
41

#### 42 **Justification of sample size**

43  
44

45 A sample size calculation for the planned design is not available using traditional formulas.  
46 Instead, simulations must be used to estimate the operating characteristics of the adaptive  
47 algorithm, including estimates of how many participants with particular characteristics are  
48 required in order to detect differences in treatments. In these simulations, the pre-specified  
49 algorithm will be applied such that the randomization of participants with particular pre-  
50 specified characteristics will depend on the number of arms and the collected outcome data.  
51 In addition, the algorithm will determine when arms are dropped for futility, when an  
52  
53  
54  
55  
56  
57  
58  
59  
60

1  
2  
3 intervention is declared superior, and will have a process for adding a new intervention to the  
4 platform trial.  
5

6  
7 Between 2500 and 4500 participants will be recruited during three consecutive winters. This  
8 range has been chosen to ensure sufficient power for comparisons in the overall population,  
9 as well as within the pre-specified subgroups. Given the nature of the study's adaptive design  
10 and the desire to ensure sufficient power for multiple hypotheses across several subgroups,  
11 the number of participants needed to be recruited is a complex multi-dimensional calculation.  
12 Hence, numerous simulations were conducted to calculate power under various plausible  
13 scenarios. The maximum target of 4500 participants was chosen from these simulations  
14 because it gave over 80% power for many of the subgroup analyses with a one day benefit in  
15 terms of symptoms relief from oseltamivir. 2500 participants will provide over 99% power  
16 for comparing the primary end point in the overall study population where there is at least  
17 one day benefit of oseltamivir for participants with confirmed influenza. This number will  
18 also provide >80% power for all subgroups if there is a 2-day benefit of oseltamivir in  
19 participants with confirmed influenza. We based these simulations on the assumption that  
20 50% of patients will have confirmed influenza and 50% of patients will have ILI originating  
21 from another viral infection.  
22  
23  
24  
25  
26  
27  
28  
29  
30

### 31 32 **Statistical Analysis** 33

34  
35 The primary analysis will be intention to treat (ITT) and will include all randomised  
36 participants in the treatment arm they were assigned regardless of treatment taken. Secondary  
37 analyses will include the subset of the ITT population with confirmed influenza. There will  
38 be at least one interim analysis when accrual and data collection for each season is complete  
39 and before recruitment opens in the subsequent flu season. If accrual is rapid and large  
40 numbers of patients are enrolled, for example in the case of flu pandemic, more than one  
41 interim analysis may be conducted during a flu season, each occurring after approximately an  
42 additional 750 patients have been enrolled. The adaptive randomisation probabilities may be  
43 updated and arms assessed for superiority after each interim analysis.  
44  
45  
46  
47  
48  
49

50 The composite primary endpoint of return to usual activities with resolution of any fever,  
51 muscle- and headache to a minor problem or less will be modelled according to a Bayesian  
52 piece-wise exponential model. This is a survival time model that allows the baseline hazard  
53 to vary across follow-up. The hazard for reaching the primary endpoint will be modelled  
54  
55  
56  
57  
58  
59  
60



1  
2  
3 during four time intervals – 0-2 day, 3-5 days, 6-10 days, and 11 or more days. Participants  
4 not reaching the primary endpoint by 28 days (including participants that die) will be  
5 considered censored at 28 days. Participants who withdraw, are lost to follow-up, or not  
6 evaluated for the primary endpoint for any reason will be considered censored at their last  
7 contact date or 28 days, whichever is earlier.  
8  
9  
10

## 11 **Cost-Effectiveness Analysis**

12  
13  
14 Cost-effectiveness analysis (CEA) will compare the direct medical costs and health outcomes  
15 (in terms of number of days where ILI limits usual activities and in terms of Quality Adjusted  
16 Life Years gained) between the different arms. The analysis will use data from the trial  
17 (resource use, EQ-5D-5L, EQ-5D-3Y and VAS scores), and other relevant data from the  
18 countries in which the trial is set (e.g., unit costs, and type of health care provided within  
19 each country). Potential differences in repeated measures (EQ-5D-5L, EQ-5D-3Y and VAS)  
20 between arms will be investigated on a per-participant basis using mixed effects models.  
21 Valuation of quality of life (using a standardized instrument for measuring generic health  
22 status) will be done in accordance with the guidelines of the Euroqol group<sup>35</sup>, using the ‘EQ-  
23 5D-5L Crosswalk Index Value Calculator’.  
24  
25  
26  
27  
28  
29  
30

31  
32 Uncertainty will be explored using bootstrapping to represent clouds of Incremental Cost-  
33 effectiveness Ratios (ICERs) on the cost-effectiveness plane, as well as cost-effectiveness  
34 acceptability curves. Subgroup analyses will be performed to acknowledge heterogeneity  
35 within each arm of the trial (e.g., age, severity, country). Value of perfect information  
36 analysis may also be performed to identify which sources of uncertainty should be reduced  
37 through additional research to efficiently improve decision making.  
38  
39  
40  
41

## 42 **Discussion**

43  
44  
45 The ALIC<sup>4</sup>E Trial will be the first large-scale, international, non-industry sponsored,  
46 pragmatic, randomised trial of (cost-)effectiveness of adding oseltamivir to best usual  
47 primary care for people suffering from ILI.  
48  
49  
50

51 ALIC<sup>4</sup>E will be an open trial in order to approximate effects in conditions close to those of  
52 usual care in order to determine real-world estimates of (cost-) effectiveness. Open trials have  
53 been criticised because, should a treatment appear beneficial, it may not be clear if the effect  
54 resulted from biological mechanism or because of a placebo effect. When considering the  
55  
56  
57  
58  
59  
60

1  
2  
3 possible outcomes of ALIC<sup>4</sup>E, if no benefit is found in the antiviral arm, despite the  
4 comparator usual care arm not being enhanced by the possible effects of a placebo, then  
5 prescribing the antiviral agent should not be recommended. On the other hand, if a benefit  
6 from an antiviral agent is identified in the pragmatic trial, given that the drug's efficacy will  
7 have already been demonstrated in many placebo-controlled trials and that the drug's  
8 mechanisms of action is known and is specific to the condition under study, then it would be  
9 obtuse to suggest that any benefit ALIC<sup>4</sup>E may identify derives from the placebo effect, and  
10 not from the antiviral's effect on influenza.  
11  
12  
13  
14  
15  
16

17 The lack of cost-effectiveness analyses alongside clinical trials, and given that children, older  
18 people and people with co-morbidities are underrepresented in studies that have been done,  
19 has once again been highlighted after the WHO's decision to downgrade the status of  
20 oseltamivir<sup>9,36</sup>. Despite the lack of trial evidence, the 2017 WHO Model List of Essential  
21 Medicines states that the use of oseltamivir should be restricted to severe illness due to  
22 confirmed, or suspected influenza virus infection in critically ill hospitalised patients<sup>10</sup>.  
23 Another report quoting the WHO states: "unless new information supporting the use in  
24 seasonal and pandemic outbreaks is provided, the next Expert Committee might consider  
25 oseltamivir for deletion"<sup>9</sup>. The current UK and US guidelines recommend treatment of  
26 defined subgroups of frail patients and patients with increased risk for complications<sup>6,37</sup>.  
27 Because the evidence base for these recommendations is incomplete, withholding treatment  
28 from these or other patients may possibly deny them benefit. By including a 'best usual  
29 primary care' arm, our study will determine the added benefit of antiviral agents over and  
30 above current practice for seasonal and potentially pandemic influenza. This information will  
31 be of great importance to the delivery of primary care for ILI, as well as enhance the evidence  
32 base around advocating self-care. In many countries, patients with ILI symptoms are advised  
33 not to consult but to self-manage, and patients with additional risk factors are seldom  
34 routinely treated with an antiviral agent. This is largely because of an absence of evidence  
35 about the cost-effectiveness overall and in sub-groups of interest.  
36  
37  
38  
39  
40  
41  
42  
43  
44  
45  
46  
47  
48

49 The virulence, spread and type of circulating influenza strains varies from season to season.  
50 ALIC<sup>4</sup>E aims to recruit over three winter/influenza seasons in 15 countries, thereby obtaining  
51 widely applicable data allowing us to determine whether any benefit or otherwise of antiviral  
52 agents is influenced by season. Furthermore, the aim is to include a wide age-range of  
53 participants from many different settings, as well as those with co-morbidities. Additionally,  
54  
55  
56  
57  
58  
59  
60

1  
2  
3 in the event of an influenza pandemic, or should additional intervention arms be included, a  
4 decision could be made to increase the maximum sample size.  
5  
6

7  
8 The adaptive design offers several advantages over a traditional study design. Recruitment  
9 into a particular arm can be stopped once a pre-determined level of certainty about the  
10 effectiveness or non-effectiveness of treatment in that arm has reached a pre-defined  
11 estimated precision. Adaptive randomisation could increase the chances of participants being  
12 allocated to arms where their information will be most useful and to the intervention that is  
13 most effective for them. This can lead to better patient care and better patient outcomes as the  
14 trial progresses. Secondly, the platform design allows new intervention arms to be added to  
15 the trial, benefiting from comparisons with existing treatment arms in a head to head way.  
16 This flexibility extends to a potential pandemic situation where additional or alternative  
17 interventions may be added according to governmental or public health recommendations. In  
18 this way, the study will remain current and relevant to clinical practice and evolving  
19 circumstances throughout.  
20  
21  
22  
23  
24  
25  
26

27  
28  
29 ALIC<sup>4</sup>E will be novel in many ways. It will provide critical information about the clinical and  
30 cost-effectiveness of adding oseltamivir to best current ILI management in conditions that  
31 approximate usual care, both overall, as well as in important, pre-specified subgroups.  
32 ALIC<sup>4</sup>E is likely therefore to enhance the evidence base supporting an important and  
33 common area of clinical practice.  
34  
35  
36  
37  
38  
39  
40

## 41 **Declarations**

### 42 **Competing interests**

43  
44 The authors declare that they have no competing interests.  
45

### 46 **Funding**

47  
48 This work was supported by the European Commission FP7 Programme grant number  
49 HEALTH-F3-2013-602525.  
50  
51

### 52 **Authors' contributions**

1  
2  
3 CCB and TV are co-chief investigators of this trial and act as guarantors of the study in its  
4 entirety. CCB and TV led the development of the research question, study design and  
5 obtaining the funding along with AV, JC, PB, HG, MJ and PL. EB, JC and AV manage the  
6 trial and coordinate the operational delivery of the study protocol to the networks co-  
7 ordinating centres. BS and JH are the trial statisticians. PB provides health economics input.  
8 MI provides support with sampling and analysis. RMA, CBr, SCh, SC, AC, MD, MDP, ADS,  
9 NF, DG, MGC, ML, FMT, AM, JP, MP, RRJ, PDS, AT, PTL, DV are representatives of the  
10 collaborating co-ordinating centres responsible for their networks participation in the trial.  
11 EB and AV drafted the manuscript, supervised by CCB. All other authors provided critical  
12 review and final approval of the manuscript.  
13  
14  
15  
16  
17  
18  
19

## 20 **Acknowledgements**

21  
22  
23 In addition to the authors, we would like to acknowledge the contribution of the other  
24 members of the 21 ALIC<sup>4</sup>E co-ordinating centres: Bohumil Seifert, Lars Bjerrum, Mike  
25 Moore, Christos Lionis, Katalin Bezzegh, Tom Fahey, Florian Nicula, Carl Llor, Heiner  
26 Bucher, Sabine de Weirdt, Jane Barnett, Nicola Blakey, Pascale Bruno, Christine Pintaric,  
27 Bernadett Kovács, Réka Pauer, Dovile Narvilaite, Nicolay Jonassen Harbin, Anna Gryko,  
28 Basia Pytel, Ania Kowalczyk, Anca Balan, Monica Groza, Patricia Fernandez-Vandellos,  
29 Carmen Rodriguez-tenreiro Sanchez, Rosa Morros, Helena Pera, Anna Garcia Sangenis,  
30 Sofia Sundvall, Filothei Voltyraki, Irene Vasilaki, Antonios Bertias and Ioanna Tsiligianni.  
31 We also acknowledge and thank the hard work and dedication of all the networks recruitment  
32 teams, practices and local laboratories.  
33  
34  
35  
36  
37  
38  
39

40 The authors would like to acknowledge the contribution of the Trial Steering Committee  
41 members, namely Patrick Bindels, Gordon Taylor, Åke Örtqvist and Keith Shankland  
42 (patient/public representative) and the Independent Data Monitoring Committee members  
43 Deborah Ashby, Sonia Saxena and Simon Gates. Also all the members of the Patient and  
44 Public Involvement group that contributed to the study design and development.  
45  
46  
47  
48

49 The authors would also like to acknowledge the other members of the collaborative  
50 PREPARE work packages, in particular: Nina Gobat and Micaela Gal (WP1); Mandy  
51 Kuijstermans, Pieter Moons and Veronique Nussenblatt (WP7); and Frank Leus, Joost  
52 Schotsman, and Susan van Hemert (WP8). Finally we acknowledge the help and support  
53 from the Nuffield Department of Primary Care Health Sciences and Primary Care Clinical  
54  
55  
56  
57  
58  
59  
60

Trials Unit, University of Oxford in particular Sonya Beecher and Julie Allen for their respective administrative and trial management support.

## Trial Status

Recruitment started in January 2016 and is expected to be completed by May 2018. The first two seasons assessed only oseltamivir as an antiviral. There are currently no other suitable antivirals available to evaluate within this trial. The current protocol is version 4.1 02-DEC-2017.

## References

1. Antonova EN, Rycroft CE, Ambrose CS, et al. Burden of paediatric influenza in Western Europe: a systematic review. *BMC Public Health* 2012;12:968. doi: 10.1186/1471-2458-12-968 <https://doi.org/10.1186/1471-2458-12-968>
2. World Health Organisation. Factsheet. <http://www.who.int/mediacentre/factsheets/fs211/en/> (accessed 10 Aug 2017).
3. Centers for Disease Control and Prevention (CDC). Estimates of deaths associated with seasonal influenza --- United States, 1976-2007. *MMWR Morb Mortal Wkly Rep* 2010;59(33):1057-62. [published Online First: 2010/08/28]
4. Schanzer DL, Langley JM, Tam TW. Co-morbidities associated with influenza-attributed mortality, 1994-2000, Canada. *Vaccine* 2008;26(36):4697-703. doi: 10.1016/j.vaccine.2008.06.087 [published Online First: 2008/07/16]
5. Adriaenssens N, Coenen S, Kroes AC, et al. European Surveillance of Antimicrobial Consumption (ESAC): systemic antiviral use in Europe. *J Antimicrob Chemother* 2011;66(8):1897-905. doi: 10.1093/jac/dkr190 [published Online First: 2011/05/31]
6. The National Institute for Health and Care Excellence. Amantadine, oseltamivir and zanamivir for the treatment of influenza. Technology appraisal guidance 168., 2009. <http://nice.org.uk/guidance/ta168> (accessed 10 Aug 2017).
7. Kramarz P, Monnet D, Nicoll A, et al. Use of oseltamivir in 12 European countries between 2002 and 2007 – lack of association with the appearance of oseltamivir-resistant influenza A(H1N1) viruses. *Eurosurveillance* 2009;14(5):19112. doi:<https://doi.org/10.2807/ese.14.05.19112-en>
8. Stephenson I, Clark TW, Pareek M. Antiviral treatment and prevention of seasonal influenza: A comparative review of recommendations in the European Union. *Journal of Clinical Virology* 2008;42(3):244-48. doi: <https://doi.org/10.1016/j.jcv.2008.04.001>
9. Kmietowicz Z. WHO downgrades oseltamivir on drugs list after reviewing evidence. *BMJ* 2017;357 <http://www.bmj.com/content/bmj/357/bmj.j2841.full.pdf> doi: 10.1136/bmj.j2841
10. World Health Organization. WHO model list of essential medicines 20th list, 2017. [http://www.who.int/medicines/publications/essentialmedicines/20th\\_EML2017\\_FINAL\\_ amendedAug2017.pdf?ua=1](http://www.who.int/medicines/publications/essentialmedicines/20th_EML2017_FINAL_ amendedAug2017.pdf?ua=1) (accessed 08 Dec 2017).
11. McNicholl IR, McNicholl JJ. Neuraminidase inhibitors: zanamivir and oseltamivir. *Ann Pharmacother* 2001;35(1):57-70. doi: 10.1345/aph.10118 [published Online First: 2001/02/24]
12. Roche Products Limited. SPC Tamiflu 30 mg, 45 mg and 75 mg Hard Capsules, 2017. <https://www.medicines.org.uk/emc/medicine/20294> (accessed 10 Aug 2017).

13. Jefferson T, Jones MA, Doshi P, et al. Neuraminidase inhibitors for preventing and treating influenza in healthy adults and children. *Cochrane Database Syst Rev* 2014(4):Cd008965. doi: 10.1002/14651858.CD008965.pub4 [published Online First: 2014/04/11]
14. Jefferson T, Jones M, Doshi P, et al. Oseltamivir for influenza in adults and children: systematic review of clinical study reports and summary of regulatory comments. *Bmj* 2014;348:g2545. doi: 10.1136/bmj.g2545 [published Online First: 2014/05/09]
15. Dobson J, Whitley RJ, Pocock S, et al. Oseltamivir treatment for influenza in adults: a meta-analysis of randomised controlled trials. *Lancet* 2015;385(9979):1729-37. doi: 10.1016/s0140-6736(14)62449-1 [published Online First: 2015/02/03]
16. Okoli GN, Otete HE, Beck CR, et al. Use of neuraminidase inhibitors for rapid containment of influenza: a systematic review and meta-analysis of individual and household transmission studies. *PLoS One* 2014;9(12):e113633. doi: 10.1371/journal.pone.0113633 [published Online First: 2014/12/10]
17. The Academy of Medical Sciences and Wellcome Trust. Use of neuraminidase inhibitors in influenza, October 2015. <https://acmedsci.ac.uk/file-download/38069-561595082cd83.pdf> (accessed 10 Aug 2017).
18. Abbasi K. The missing data that cost \$20bn. *BMJ : British Medical Journal* 2014;348 <http://www.bmj.com/content/bmj/348/bmj.g2695.full.pdf> doi: 10.1136/bmj.g2695
19. PREPARE Consortium. Platform for European Preparedness Against (Re-) emerging Epidemics. <https://www.prepare-europe.eu/> (accessed 10 Aug 2017).
20. GRACE-LRTI Consortium. Genomics to combat Resistance against Antibiotics in Community-acquired LRTI in Europe [Available from: <http://www.grace-lrti.org> (accessed 10 Aug 2017)].
21. Nuttall J, Hood K, Verheij TJ, et al. Building an international network for a primary care research program: reflections on challenges and solutions in the set-up and delivery of a prospective observational study of acute cough in 13 European countries. *BMC Family Practice* 2011;12(1):78. doi: 10.1186/1471-2296-12-78
22. European Centre for Disease Prevention and Control. Seasonal Influenza Surveillance Reports. <https://ecdc.europa.eu/en/seasonal-influenza/surveillance-reports-and-disease-data> (accessed 08 Dec 2017).
23. Official Journal of European Union. Commission implementing decision of 8 August 2012 amending Decision 2002/253/EC laying down case definitions for reporting communicable diseases to the Community network under Decision No 2119/98/EC of the European Parliament and of the Council (notified under document C(2012) 5538)., 2012:16. <http://eur-lex.europa.eu/legal-content/EN/TXT/PDF/?uri=CELEX:32012D0506&qid=1428573336660&from=EN#page=16> (accessed 08 Feb 2018).
24. Casalegno JS, Eibach D, Valette M, et al. Performance of influenza case definitions for influenza community surveillance: based on the French influenza surveillance network GROG, 2009-2014. *Euro Surveill* 2017.
25. Aguilera JF, Paget WJ, Mosnier A, et al. Heterogeneous case definitions used for the surveillance of influenza in Europe. *Eur J Epidemiol* 2003;18(8):751-4. [published Online First: 2003/09/17]
26. Berry DA. Bayesian clinical trials. *Nat Rev Drug Discov* 2006;5(1):27-36. doi: 10.1038/nrd1927 [published Online First: 2006/02/18]
27. Krumholz HM. Neuraminidase inhibitors for influenza. *BMJ : British Medical Journal* 2014;348 doi: 10.1136/bmj.g2548
28. Thorpe KE, Zwarenstein M, Oxman AD, et al. A pragmatic-explanatory continuum indicator summary (PRECIS): a tool to help trial designers. *J Clin Epidemiol* 2009;62(5):464-75. doi: 10.1016/j.jclinepi.2008.12.011 [published Online First: 2009/04/08]

- 1  
2  
3 29. Little P, Williamson I, Warner G, et al. Open randomised trial of prescribing strategies in  
4 managing sore throat. *Bmj* 1997;314(7082):722-7. [published Online First: 1997/03/08]  
5 30. Little P, Rumsby K, Kelly J, et al. Information leaflet and antibiotic prescribing strategies for acute  
6 lower respiratory tract infection: a randomized controlled trial. *Jama* 2005;293(24):3029-35.  
7 doi: 10.1001/jama.293.24.3029 [published Online First: 2005/06/24]  
8 31. Jacobs B, Young NL, Dick PT, et al. Canadian Acute Respiratory Illness and Flu Scale (CARIFS):  
9 development of a valid measure for childhood respiratory infections. *J Clin Epidemiol*  
10 2000;53(8):793-9. [published Online First: 2000/08/16]  
11 32. Berry SM, Connor JT, Lewis RJ. The platform trial: an efficient strategy for evaluating multiple  
12 treatments. *Jama* 2015;313(16):1619-20. doi: 10.1001/jama.2015.2316 [published Online  
13 First: 2015/03/24]  
14 33. Woodcock J, LaVange LM. Master Protocols to Study Multiple Therapies, Multiple Diseases, or  
15 Both. *New England Journal of Medicine* 2017;377(1):62-70. doi: 10.1056/NEJMra1510062  
16 34. Saville BR, Berry SM. Efficiencies of platform clinical trials: A vision of the future. *Clin Trials*  
17 2016;13(3):358-66. doi: 10.1177/1740774515626362 [published Online First: 2016/02/26]  
18 35. EuroQol Research Foundation. EuroQol EQ-5D. <https://euroqol.org/euroqol/2017> (accessed 27  
19 Nov 2017).  
20 36. Ebell MH. WHO downgrades status of oseltamivir. *Bmj* 2017;358:j3266. doi: 10.1136/bmj.j3266  
21 [published Online First: 2017/07/14]  
22 37. Fiore AE, Fry A, Shay D, et al. Antiviral agents for the treatment and chemoprophylaxis of  
23 influenza --- recommendations of the Advisory Committee on Immunization Practices (ACIP).  
24 *MMWR Recomm Rep* 2011;60(1):1-24. [published Online First: 2011/01/21]  
25  
26

27 Figure 1. ALIC<sup>4</sup>E European Networks. Coordinating centres are in Oxford, UK and Utrecht,  
28 The Netherlands. The ALIC<sup>4</sup>E recruiting networks include: Belgium (Antwerp, Ghent);  
29 Czech Republic; Denmark; France; Greece; Hungary; Ireland; Lithuania; Netherlands,  
30 Norway; Poland (Bialystok, Lodz); Spain (Barcelona, Catalonia, Santiago de Compostela);  
31 Sweden; Switzerland; and the UK (Oxford, Southampton and Cardiff).  
32  
33  
34  
35

## 36 Endnotes

37  
38  
39 <sup>i</sup> Heart Disease/ Diabetes/Chronic respiratory condition (e.g. asthma, COPD)/Hepatic, hematologic, neurologic  
40 or neurodevelopmental condition/Stroke or Transient Ischemic Attack/Overnight hospital admission in the last  
41 year.

42 <sup>ii</sup> Rhinovirus, Coronavirus (NL63/229E/OC43/HKU1), Parainfluenza (1, 2, 3, 4), Human Metapneumovirus A/B,  
43 Bocavirus, Respiratory Syncytial Viruses A/B, Adenovirus, Enterovirus, Parechovirus.

44 <sup>iii</sup> *Mycoplasma pneumoniae*, *Chlamydia pneumoniae*, *Streptococcus pneumoniae*, *Haemophilus influenzae type*  
45 *B*, *Staphylococcus aureus*.  
46  
47  
48  
49  
50  
51  
52  
53  
54  
55  
56  
57  
58  
59  
60



1  
2  
3  
4  
5  
6  
7  
8  
9  
10  
11  
12  
13  
14  
15  
16  
17  
18  
19  
20  
21  
22  
23  
24  
25  
26  
27  
28  
29  
30  
31  
32  
33  
34  
35  
36  
37  
38  
39  
40  
41  
42  
43  
44  
45  
46  
47  
48  
49  
50  
51  
52  
53  
54  
55  
56  
57  
58  
59  
60

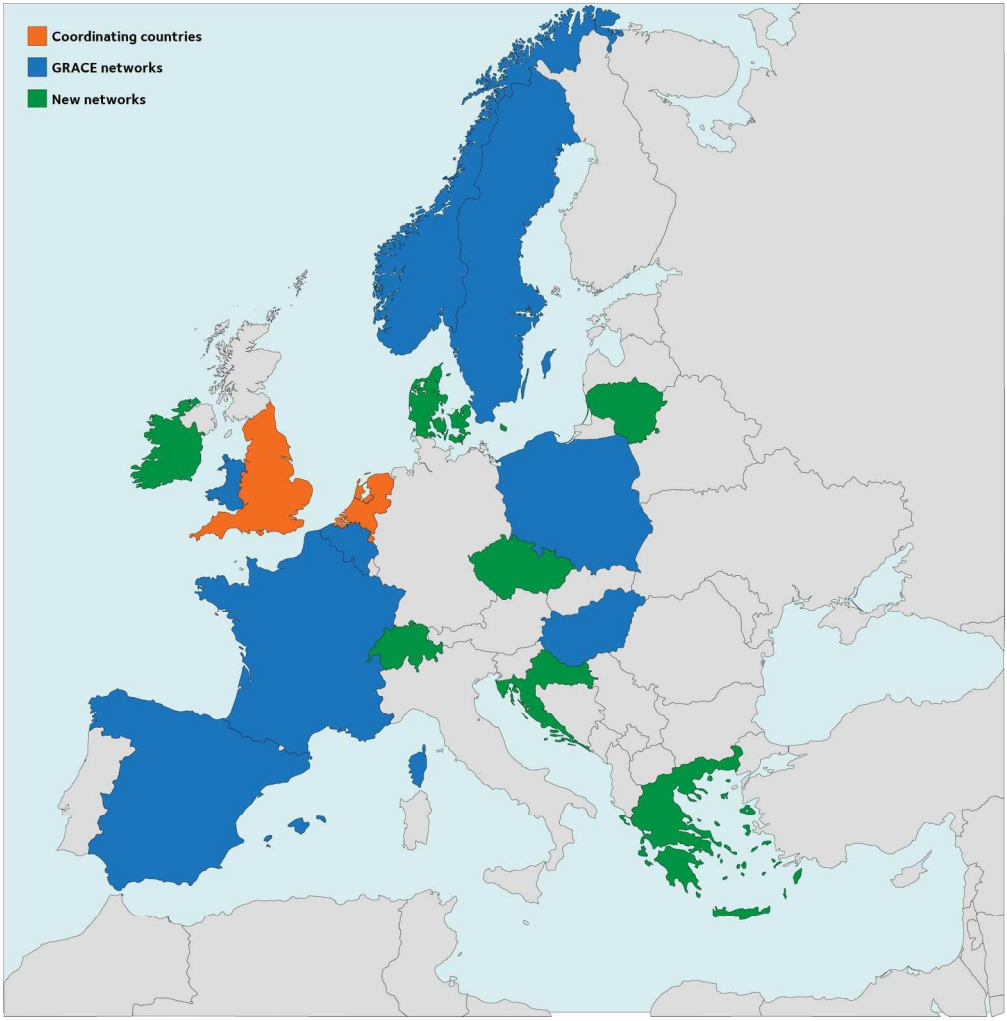

Figure 1. ALIC4E European Networks. Coordinating centres are in Oxford, UK and Utrecht, The Netherlands. The ALIC4E recruiting networks include: Belgium (Antwerp, Ghent); Czech Republic; Denmark; France; Greece; Hungary; Ireland; Lithuania; Netherlands, Norway; Poland (Bialystok, Lodz); Spain (Barcelona, Catalonia, Santiago de Compostela); Sweden; Switzerland; and the UK (Oxford, Southampton and Cardiff).

171x173mm (300 x 300 DPI)





SPIRIT 2013 Checklist: Recommended items to address in a clinical trial protocol and related documents\*

| Section/item                      | Item No | Description                                                                                                                                                                                                                                                                              | Addressed on page number        |
|-----------------------------------|---------|------------------------------------------------------------------------------------------------------------------------------------------------------------------------------------------------------------------------------------------------------------------------------------------|---------------------------------|
| <b>Administrative information</b> |         |                                                                                                                                                                                                                                                                                          |                                 |
| Title                             | 1       | Descriptive title identifying the study design, population, interventions, and, if applicable, trial acronym                                                                                                                                                                             | _____1_____                     |
| Trial registration                | 2a      | Trial identifier and registry name. If not yet registered, name of intended registry                                                                                                                                                                                                     | _____3_____                     |
|                                   | 2b      | All items from the World Health Organization Trial Registration Data Set                                                                                                                                                                                                                 | __1, 3, 8, 18, 23, 30, 34, 38__ |
| Protocol version                  | 3       | Date and version identifier                                                                                                                                                                                                                                                              | _____2_____                     |
| Funding                           | 4       | Sources and types of financial, material, and other support                                                                                                                                                                                                                              | _____3, 35__                    |
| Roles and responsibilities        | 5a      | Names, affiliations, and roles of protocol contributors                                                                                                                                                                                                                                  | _____3, 7_____                  |
|                                   | 5b      | Name and contact information for the trial sponsor                                                                                                                                                                                                                                       | _____7_____                     |
|                                   | 5c      | Role of study sponsor and funders, if any, in study design; collection, management, analysis, and interpretation of data; writing of the report; and the decision to submit the report for publication, including whether they will have ultimate authority over any of these activities | _____n/a_____                   |
|                                   | 5d      | Composition, roles, and responsibilities of the coordinating centre, steering committee, endpoint adjudication committee, data management team, and other individuals or groups overseeing the trial, if applicable (see Item 21a for data monitoring committee)                         | _____33_____                    |

1  
2  
3  
4  
5  
6  
7  
8  
9  
10  
11  
12  
13  
14  
15  
16  
17  
18  
19  
20  
21  
22  
23  
24  
25  
26  
27  
28  
29  
30  
31  
32  
33  
34  
35  
36  
37  
38  
39  
40  
41  
42  
43  
44  
45  
46  
47

## Introduction

|                          |    |                                                                                                                                                                                                           |              |
|--------------------------|----|-----------------------------------------------------------------------------------------------------------------------------------------------------------------------------------------------------------|--------------|
| Background and rationale | 6a | Description of research question and justification for undertaking the trial, including summary of relevant studies (published and unpublished) examining benefits and harms for each intervention        | _____10_____ |
|                          | 6b | Explanation for choice of comparators                                                                                                                                                                     | _____11-14__ |
| Objectives               | 7  | Specific objectives or hypotheses                                                                                                                                                                         | _____16__    |
| Trial design             | 8  | Description of trial design including type of trial (eg, parallel group, crossover, factorial, single group), allocation ratio, and framework (eg, superiority, equivalence, noninferiority, exploratory) | _____13__    |

## Methods: Participants, interventions, and outcomes

|                      |     |                                                                                                                                                                                                                                                                                                                                                                                |                 |
|----------------------|-----|--------------------------------------------------------------------------------------------------------------------------------------------------------------------------------------------------------------------------------------------------------------------------------------------------------------------------------------------------------------------------------|-----------------|
| Study setting        | 9   | Description of study settings (eg, community clinic, academic hospital) and list of countries where data will be collected. Reference to where list of study sites can be obtained                                                                                                                                                                                             | ___19, 32, 38__ |
| Eligibility criteria | 10  | Inclusion and exclusion criteria for participants. If applicable, eligibility criteria for study centres and individuals who will perform the interventions (eg, surgeons, psychotherapists)                                                                                                                                                                                   | _____18__       |
| Interventions        | 11a | Interventions for each group with sufficient detail to allow replication, including how and when they will be administered                                                                                                                                                                                                                                                     | ___18-24_____   |
|                      | 11b | Criteria for discontinuing or modifying allocated interventions for a given trial participant (eg, drug dose change in response to harms, participant request, or improving/worsening disease)                                                                                                                                                                                 | _____23, 26__   |
|                      | 11c | Strategies to improve adherence to intervention protocols, and any procedures for monitoring adherence (eg, drug tablet return, laboratory tests)                                                                                                                                                                                                                              | _____24__       |
|                      | 11d | Relevant concomitant care and interventions that are permitted or prohibited during the trial                                                                                                                                                                                                                                                                                  | _____24__       |
| Outcomes             | 12  | Primary, secondary, and other outcomes, including the specific measurement variable (eg, systolic blood pressure), analysis metric (eg, change from baseline, final value, time to event), method of aggregation (eg, median, proportion), and time point for each outcome. Explanation of the clinical relevance of chosen efficacy and harm outcomes is strongly recommended | _____16-17__    |
| Participant timeline | 13  | Time schedule of enrolment, interventions (including any run-ins and washouts), assessments, and visits for participants. A schematic diagram is highly recommended (see Figure)                                                                                                                                                                                               | _____37, 39__   |

|   |             |    |                                                                                                                                                                                       |              |
|---|-------------|----|---------------------------------------------------------------------------------------------------------------------------------------------------------------------------------------|--------------|
| 1 |             |    |                                                                                                                                                                                       |              |
| 2 |             |    |                                                                                                                                                                                       |              |
| 3 | Sample size | 14 | Estimated number of participants needed to achieve study objectives and how it was determined, including clinical and statistical assumptions supporting any sample size calculations | _____30_____ |
| 4 |             |    |                                                                                                                                                                                       |              |
| 5 | Recruitment | 15 | Strategies for achieving adequate participant enrolment to reach target sample size                                                                                                   | _____30_____ |
| 6 |             |    |                                                                                                                                                                                       |              |
| 7 |             |    |                                                                                                                                                                                       |              |

### 8 **Methods: Assignment of interventions (for controlled trials)**

#### 9 Allocation:

|    |                                  |     |                                                                                                                                                                                                                                                                                                                                                          |              |
|----|----------------------------------|-----|----------------------------------------------------------------------------------------------------------------------------------------------------------------------------------------------------------------------------------------------------------------------------------------------------------------------------------------------------------|--------------|
| 10 |                                  |     |                                                                                                                                                                                                                                                                                                                                                          |              |
| 11 |                                  |     |                                                                                                                                                                                                                                                                                                                                                          |              |
| 12 | Sequence generation              | 16a | Method of generating the allocation sequence (eg, computer-generated random numbers), and list of any factors for stratification. To reduce predictability of a random sequence, details of any planned restriction (eg, blocking) should be provided in a separate document that is unavailable to those who enrol participants or assign interventions | _____20_____ |
| 13 |                                  |     |                                                                                                                                                                                                                                                                                                                                                          |              |
| 14 |                                  |     |                                                                                                                                                                                                                                                                                                                                                          |              |
| 15 |                                  |     |                                                                                                                                                                                                                                                                                                                                                          |              |
| 16 |                                  |     |                                                                                                                                                                                                                                                                                                                                                          |              |
| 17 | Allocation concealment mechanism | 16b | Mechanism of implementing the allocation sequence (eg, central telephone; sequentially numbered, opaque, sealed envelopes), describing any steps to conceal the sequence until interventions are assigned                                                                                                                                                | _____20_____ |
| 18 |                                  |     |                                                                                                                                                                                                                                                                                                                                                          |              |
| 19 |                                  |     |                                                                                                                                                                                                                                                                                                                                                          |              |
| 20 |                                  |     |                                                                                                                                                                                                                                                                                                                                                          |              |
| 21 | Implementation                   | 16c | Who will generate the allocation sequence, who will enrol participants, and who will assign participants to interventions                                                                                                                                                                                                                                | _____20_____ |
| 22 |                                  |     |                                                                                                                                                                                                                                                                                                                                                          |              |
| 23 |                                  |     |                                                                                                                                                                                                                                                                                                                                                          |              |
| 24 | Blinding (masking)               | 17a | Who will be blinded after assignment to interventions (eg, trial participants, care providers, outcome assessors, data analysts), and how                                                                                                                                                                                                                | _____20_____ |
| 25 |                                  |     |                                                                                                                                                                                                                                                                                                                                                          |              |
| 26 |                                  |     |                                                                                                                                                                                                                                                                                                                                                          |              |
| 27 |                                  | 17b | If blinded, circumstances under which unblinding is permissible, and procedure for revealing a participant's allocated intervention during the trial                                                                                                                                                                                                     | _____20_____ |
| 28 |                                  |     |                                                                                                                                                                                                                                                                                                                                                          |              |
| 29 |                                  |     |                                                                                                                                                                                                                                                                                                                                                          |              |
| 30 |                                  |     |                                                                                                                                                                                                                                                                                                                                                          |              |

### 31 **Methods: Data collection, management, and analysis**

|    |                         |     |                                                                                                                                                                                                                                                                                                                                                                                                              |                   |
|----|-------------------------|-----|--------------------------------------------------------------------------------------------------------------------------------------------------------------------------------------------------------------------------------------------------------------------------------------------------------------------------------------------------------------------------------------------------------------|-------------------|
| 32 |                         |     |                                                                                                                                                                                                                                                                                                                                                                                                              |                   |
| 33 | Data collection methods | 18a | Plans for assessment and collection of outcome, baseline, and other trial data, including any related processes to promote data quality (eg, duplicate measurements, training of assessors) and a description of study instruments (eg, questionnaires, laboratory tests) along with their reliability and validity, if known. Reference to where data collection forms can be found, if not in the protocol | _____20 - 23_____ |
| 34 |                         |     |                                                                                                                                                                                                                                                                                                                                                                                                              |                   |
| 35 |                         |     |                                                                                                                                                                                                                                                                                                                                                                                                              |                   |
| 36 |                         |     |                                                                                                                                                                                                                                                                                                                                                                                                              |                   |
| 37 |                         |     |                                                                                                                                                                                                                                                                                                                                                                                                              |                   |
| 38 |                         | 18b | Plans to promote participant retention and complete follow-up, including list of any outcome data to be collected for participants who discontinue or deviate from intervention protocols                                                                                                                                                                                                                    | _____23, 29_____  |
| 39 |                         |     |                                                                                                                                                                                                                                                                                                                                                                                                              |                   |
| 40 |                         |     |                                                                                                                                                                                                                                                                                                                                                                                                              |                   |
| 41 |                         |     |                                                                                                                                                                                                                                                                                                                                                                                                              |                   |
| 42 |                         |     |                                                                                                                                                                                                                                                                                                                                                                                                              |                   |
| 43 |                         |     |                                                                                                                                                                                                                                                                                                                                                                                                              |                   |
| 44 |                         |     |                                                                                                                                                                                                                                                                                                                                                                                                              |                   |
| 45 |                         |     |                                                                                                                                                                                                                                                                                                                                                                                                              |                   |
| 46 |                         |     |                                                                                                                                                                                                                                                                                                                                                                                                              |                   |
| 47 |                         |     |                                                                                                                                                                                                                                                                                                                                                                                                              |                   |

1  
2  
3  
4  
5  
6  
7  
8  
9  
10  
11  
12  
13  
14  
15  
16  
17  
18  
19  
20  
21  
22  
23  
24  
25  
26  
27  
28  
29  
30  
31  
32  
33  
34  
35  
36  
37  
38  
39  
40  
41  
42  
43  
44  
45  
46  
47

Data management 19 Plans for data entry, coding, security, and storage, including any related processes to promote data quality (eg, double data entry; range checks for data values). Reference to where details of data management procedures can be found, if not in the protocol 32-33

Statistical methods 20a Statistical methods for analysing primary and secondary outcomes. Reference to where other details of the statistical analysis plan can be found, if not in the protocol 27-32

20b Methods for any additional analyses (eg, subgroup and adjusted analyses) 27-32

20c Definition of analysis population relating to protocol non-adherence (eg, as randomised analysis), and any statistical methods to handle missing data (eg, multiple imputation) 30

**Methods: Monitoring**

Data monitoring 21a Composition of data monitoring committee (DMC); summary of its role and reporting structure; statement of whether it is independent from the sponsor and competing interests; and reference to where further details about its charter can be found, if not in the protocol. Alternatively, an explanation of why a DMC is not needed 27, 33

21b Description of any interim analyses and stopping guidelines, including who will have access to these interim results and make the final decision to terminate the trial 28, 33

Harms 22 Plans for collecting, assessing, reporting, and managing solicited and spontaneously reported adverse events and other unintended effects of trial interventions or trial conduct 25-27

Auditing 23 Frequency and procedures for auditing trial conduct, if any, and whether the process will be independent from investigators and the sponsor 33

**Ethics and dissemination**

Research ethics approval 24 Plans for seeking research ethics committee/institutional review board (REC/IRB) approval 34

Protocol amendments 25 Plans for communicating important protocol modifications (eg, changes to eligibility criteria, outcomes, analyses) to relevant parties (eg, investigators, REC/IRBs, trial participants, trial registries, journals, regulators) 34



|    |                               |     |                                                                                                                                                                                                                                                                                     |                    |
|----|-------------------------------|-----|-------------------------------------------------------------------------------------------------------------------------------------------------------------------------------------------------------------------------------------------------------------------------------------|--------------------|
| 1  |                               |     |                                                                                                                                                                                                                                                                                     |                    |
| 2  |                               |     |                                                                                                                                                                                                                                                                                     |                    |
| 3  | Consent or assent             | 26a | Who will obtain informed consent or assent from potential trial participants or authorised surrogates, and how (see Item 32)                                                                                                                                                        | _____19_____       |
| 4  |                               |     |                                                                                                                                                                                                                                                                                     |                    |
| 5  |                               |     |                                                                                                                                                                                                                                                                                     |                    |
| 6  |                               | 26b | Additional consent provisions for collection and use of participant data and biological specimens in ancillary studies, if applicable                                                                                                                                               | _____19_____       |
| 7  |                               |     |                                                                                                                                                                                                                                                                                     |                    |
| 8  | Confidentiality               | 27  | How personal information about potential and enrolled participants will be collected, shared, and maintained in order to protect confidentiality before, during, and after the trial                                                                                                | _____34_____       |
| 9  |                               |     |                                                                                                                                                                                                                                                                                     |                    |
| 10 |                               |     |                                                                                                                                                                                                                                                                                     |                    |
| 11 | Declaration of interests      | 28  | Financial and other competing interests for principal investigators for the overall trial and each study site                                                                                                                                                                       | _____3_____        |
| 12 |                               |     |                                                                                                                                                                                                                                                                                     |                    |
| 13 |                               |     |                                                                                                                                                                                                                                                                                     |                    |
| 14 | Access to data                | 29  | Statement of who will have access to the final trial dataset, and disclosure of contractual agreements that limit such access for investigators                                                                                                                                     | _____32_____       |
| 15 |                               |     |                                                                                                                                                                                                                                                                                     |                    |
| 16 |                               |     |                                                                                                                                                                                                                                                                                     |                    |
| 17 | Ancillary and post-trial care | 30  | Provisions, if any, for ancillary and post-trial care, and for compensation to those who suffer harm from trial participation                                                                                                                                                       | _____35_____       |
| 18 |                               |     |                                                                                                                                                                                                                                                                                     |                    |
| 19 |                               |     |                                                                                                                                                                                                                                                                                     |                    |
| 20 | Dissemination policy          | 31a | Plans for investigators and sponsor to communicate trial results to participants, healthcare professionals, the public, and other relevant groups (eg, via publication, reporting in results databases, or other data sharing arrangements), including any publication restrictions | _____35_____       |
| 21 |                               |     |                                                                                                                                                                                                                                                                                     |                    |
| 22 |                               |     |                                                                                                                                                                                                                                                                                     |                    |
| 23 |                               |     |                                                                                                                                                                                                                                                                                     |                    |
| 24 |                               |     |                                                                                                                                                                                                                                                                                     |                    |
| 25 |                               | 31b | Authorship eligibility guidelines and any intended use of professional writers                                                                                                                                                                                                      | _____35_____       |
| 26 |                               |     |                                                                                                                                                                                                                                                                                     |                    |
| 27 |                               | 31c | Plans, if any, for granting public access to the full protocol, participant-level dataset, and statistical code                                                                                                                                                                     | _____n/a_____      |
| 28 |                               |     |                                                                                                                                                                                                                                                                                     |                    |
| 29 | <b>Appendices</b>             |     |                                                                                                                                                                                                                                                                                     |                    |
| 30 |                               |     |                                                                                                                                                                                                                                                                                     |                    |
| 31 | Informed consent materials    | 32  | Model consent form and other related documentation given to participants and authorised surrogates                                                                                                                                                                                  | _____separate_____ |
| 32 |                               |     |                                                                                                                                                                                                                                                                                     |                    |
| 33 |                               |     |                                                                                                                                                                                                                                                                                     |                    |
| 34 | Biological specimens          | 33  | Plans for collection, laboratory evaluation, and storage of biological specimens for genetic or molecular analysis in the current trial and for future use in ancillary studies, if applicable                                                                                      | _____41_____       |
| 35 |                               |     |                                                                                                                                                                                                                                                                                     |                    |
| 36 |                               |     |                                                                                                                                                                                                                                                                                     |                    |

37 \*It is strongly recommended that this checklist be read in conjunction with the SPIRIT 2013 Explanation & Elaboration for important clarification on the items.  
 38 Amendments to the protocol should be tracked and dated. The SPIRIT checklist is copyrighted by the SPIRIT Group under the Creative Commons  
 39 "[Attribution-NonCommercial-NoDerivs 3.0 Unported](https://creativecommons.org/licenses/by-nc-nd/3.0/)" license.  
 40
